# Supplementary material for: An RNAi in silico approach to find an optimal shRNA cocktail against HIV-1
Source: Virol J. 2010 Dec 20;7:369. doi: 10.1186/1743-422X-7-369 (PMC3022682; doi:10.1186/1743-422X-7-369)
Supplement: Additional file 1 — Frequent shRNAs in all the MSA. The table shows all the frequent shRNAs (48), each of which occurred at least 4 times in an alignment. [file 1743-422X-7-369-S1.XLS]

## Sheet: Hoja1
Additional file 1. List of the dominant and subdominant shRNAs for each MSA
shRNA	shRNA Sequence	a MSA	b Freq	Score
1	GCCTGAAAATCCATACAATACTCC	ZDV-3TC-ABC	33	5
		D4T-3TC-NVP	52
		ZDV-3TC-EFV	741
		2298_Resistant_Isolates	22
2	GCCTGAAAATCCATATAACACTCC	ZDV-3TC-ABC	4	4.5
		D4T-3TC-NVP	6
		ZDV-3TC-EFV	19
3	GCCTGAAAACCCATATAATACTCC	ZDV-3TC-ABC	4	7.5
4	GCCTGAAAATCCATATAATACTCC	D4T-3TC-NVP	6	6.5
		ZDV-3TC-EFV	223
5	GCCTGAAAACCCATACAATACTCC	D4T-3TC-NVP	4	5
		ZDV-3TC-EFV	62
6	GCCTGAAAATCCATACAACACTCC	D4T-3TC-NVP	3	2
		ZDV-3TC-EFV	29
7	AGCAGATGATACAGTAGTAGAAGA	POL_DNA_No_Recombinants	10	6
		GENOME_DNA_No_Recombinants	11
		POL_DNA_GroupM_Recombinants	14
		GENOME_DNA_GroupM_Recombinants	16
		POL_DNA_All_Subtypes	16
		GENOME_DNA_All_Subtype	18
8	AGCAGATGATACAGTGTTAGAAGA	POL_DNA_No_Recombinants	23	6
		GENOME_DNA_No_Recombinants	25
		POL_DNA_GroupM_Recombinants	30
		GENOME_DNA_GroupM_Recombinants	33
		POL_DNA_All_Subtypes	30
		GENOME_DNA_All_Subtype	33
9	AGCAGATGATACAGTATTAGAGGA	POL_DNA_No_Recombinants	12	3
		GENOME_DNA_No_Recombinants	12
		POL_DNA_GroupM_Recombinants	15
		GENOME_DNA_GroupM_Recombinants	14
		POL_DNA_All_Subtypes	15
		GENOME_DNA_All_Subtype	14
10	AGCAGATGATACAGTCTTAGAAGA	POL_DNA_No_Recombinants	6	6
		GENOME_DNA_No_Recombinants	6
		POL_DNA_GroupM_Recombinants	9
		POL_DNA_All_Subtypes	9
		GENOME_DNA_All_Subtype	9
11	AGCAGATGATACAGTACTAGAAGA	POL_DNA_No_Recombinants	13	6
		GENOME_DNA_No_Recombinants	11
		GENOME_DNA_GroupM_Recombinants	17
		POL_DNA_All_Subtypes	17
		GENOME_DNA_All_Subtype	17
		2298_Resistant_Isolates	6
12	CCTGTAAAATTAAAGCCAGGAATG	AZT-3TC-EFV	14	2
		2298_Resistant_Isolates	14
		2298_Resistant_Isolates	14
13	AGCAGATGACACAGTATTAGAAGA	POL_DNA_No_Recombinants	21	7
		GENOME_DNA_No_Recombinants	21
		POL_DNA_GroupM_Recombinants	31
		GENOME_DNA_GroupM_Recombinants	31
		POL_DNA_All_Subtypes	31
		GENOME_DNA_All_Subtype	31
14	AGCAGATGATACAGTATTGGAAGA	POL_DNA_No_Recombinants	11	6
		GENOME_DNA_No_Recombinants	11
		POL_DNA_GroupM_Recombinants	15
		GENOME_DNA_GroupM_Recombinants	15
		POL_DNA_All_Subtypes	15
		GENOME_DNA_All_Subtype	15
15	GGCAGATGATACAGTATTAGAAGA	POL_DNA_No_Recombinants	16	7
		GENOME_DNA_No_Recombinants	17
		POL_DNA_GroupM_Recombinants	26
		GENOME_DNA_GroupM_Recombinants	27
		POL_DNA_All_Subtypes	26
		GENOME_DNA_All_Subtype	27
16	AGCAGATGATACAGTATTAGAAGA	POL_DNA_No_Recombinants	588	7
		GENOME_DNA_No_Recombinants	599
		POL_DNA_GroupM_Recombinants	913
		GENOME_DNA_GroupM_Recombinants	918
		POL_DNA_All_Subtypes	916
		GENOME_DNA_All_Subtype	920
		2298_Resistant_Isolates	21
17	AGCAGACGATACAGTATTAGAAGA	POL_DNA_No_Recombinants	7	7
		GENOME_DNA_No_Recombinants	6
		POL_DNA_GroupM_Recombinants	8
		GENOME_DNA_GroupM_Recombinants	7
		POL_DNA_All_Subtypes	8
18	AGCGGATGATACAGTATTAGAAGA	POL_DNA_No_Recombinants	4	7
		GENOME_DNA_No_Recombinants	5
		POL_DNA_GroupM_Recombinants	6
		POL_DNA_All_Subtypes	6
		GENOME_DNA_All_Subtype	7
19	AGTCCTATTGACACTGTACCAGTA	ZDV-3TC-EFV	8	2.5
20	AGTCCTATTGAAACTGTGCCAGTA	ZDV-3TC-EFV	21	2.5
21	AGTCCTATTGAAACTGTACCAGTA	ZDV-3TC-EFV	1013	2.5
22	AGTCCTATCGAAACTGTACCAGTA	ZDV-3TC-EFV	6	2.5
23	AGTCCTATTGAAGCTGTACCAGTA	ZDV-3TC-EFV	8	2
24	AGTCCTATTGAAACTGTACCTGTA	ZDV-3TC-EFV	14	2.5
25	AGTCCTATTAAAACTGTACCAGTA	ZDV-3TC-EFV	11	2.5
26	AGTCCTATTGAAACTGTACCAGTG	ZDV-3TC-EFV	6	2
27	AGTCCTATTGAGACTGTACCAGTA	ZDV-3TC-EFV	51	2.5
28	AGTCCTATTGAAACAGTACCAGTG	ZDV-3TC-EFV	13	2
29	CCAGTAAGACTAAAACCAGGAATG	ZDV-3TC-EFV	13	3
30	CCAGCAAAATTAAAGCCAGGAATG	ZDV-3TC-EFV	7	3
31	cCCAGTAAGATTAAAGCCAGGAATG	ZDV-3TC-EFV	9	2
		2299_Resistant_Isolates	12
		2299_Resistant_Isolates	12
32	cCCAGTAAAATTAAAACCAGGAATG	ZDV-3TC-EFV	60	3
		2299_Resistant_Isolates	74
		2299_Resistant_Isolates	74
33	cCCAGTAAAATTAAAGCCAGGAATG	ZDV-3TC-EFV	926	2
		2299_Resistant_Isolates	1255
		2299_Resistant_Isolates	1267
34	CCAGTAAAATTAAAGCCAGGTATG	ZDV-3TC-EFV	13	2
35	cCCAGTGAAATTAAAGCCAGGAATG	ZDV-3TC-EFV	27	2
		2299_Resistant_Isolates	18
		2299_Resistant_Isolates	18
36	cCCAGTAAAATTGAAACCAGGAATG	ZDV-3TC-EFV	15	3
		2299_Resistant_Isolates	8
		2299_Resistant_Isolates	8
37	CCAGCAAAATTAAAGCCAGGTATG	ZDV-3TC-EFV	6	3
38	cCCAGTAAAGTTAAAGCCAGGAATG	ZDV-3TC-EFV	17	2
		2299_Resistant_Isolates	16
		2299_Resistant_Isolates	16
39	cCCAGTAAAATTGAAGCCAGGAATG	ZDV-3TC-EFV	48	2
		2299_Resistant_Isolates	77
		2299_Resistant_Isolates	77
40	CCAGTAAAATTAAGGCCAGGAATG	ZDV-3TC-EFV	7	2
41	cCCAGTAAAATTAAAGCCAGGAGTG	ZDV-3TC-EFV	11	2
		2299_Resistant_Isolates	8
		2299_Resistant_Isolates	8
42	GCCTGAGAATCCATATAATACTCC	ZDV-3TC-EFV	8	7
43	GCCTGAGAATCCATACAATACTCC	ZDV-3TC-EFV	22	4.5
44	GCCTGAAAATCCGTACAATACTCC	ZDV-3TC-EFV	42	3.5
45	ACCTGAAAATCCATACAATACTCC	ZDV-3TC-EFV	43	5
46	GCCTGAAAATCCCTACAATACTCC	ZDV-3TC-EFV	67	3.5
47	ACCTGAAAATCCATATAACACTCC	ZDV-3TC-EFV	7	4.5
48	GCCCGAAAATCCATACAATACTCC	ZDV-3TC-EFV	10	4
49	ACCTGAAAATCCATACAACACTCC	ZDV-3TC-EFV	8	3
43	cCCAGTAACATTAAAGCCAGGAATG	2299_Resistant_Isolates	14	3
		2299_Resistant_Isolates	14
44	cCCAGTAAAATTAAACCCAGGAATG	2299_Resistant_Isolates	6	2
		2299_Resistant_Isolates	6
45	cCCAGTAAAACTAAAGCCAGGAATG	2299_Resistant_Isolates	23	2
		2299_Resistant_Isolates	23
46	cACACCTGTCAACATAATTGGAAGA	2299_Resistant_Isolates	29	6.5
47	cCACCTGTCAACATAATTGGAAGAA	2299_Resistant_Isolates	29	3
48	cACCACACCAGACAAAAAACATCAG	2299_Resistant_Isolates	19	4
a MSA ,multiple sequence aligment
b Freq, frequence (is the number of times a shRNA sequence appears in a MSA)
c shRNA targets two different sites in the virus genome (resistant isolates)
Table 1S. List of the dominant and subdominant shRNAs for each MSA. The table shows the dominant and subdominant viral variants for each MSA in a 23 sliding window (variants must occur 4 or more times to be considered frequent). This means that there are other viral variants for each seleced window, but they are very infrequent and hence are not shown. Since a shRNA can target multiple sequences …
