# Supplementary material for: An RNAi in silico approach to find an optimal shRNA cocktail against HIV-1
Source: Virol J. 2010 Dec 20;7:369. doi: 10.1186/1743-422X-7-369 (PMC3022682; doi:10.1186/1743-422X-7-369)
Supplement: Additional file 2 — Data File. There are two sheets that correspond to raw data. The first sheet has the results obtained using a score threshold of 2, and the other sheet has the results obtained with no score threshold. Notice that in this second sheet, the same windows appeared that were selected in the first sheet, in addition to new windows that were initially discarded due to score threshold. All these new windows passed the first filters in which free energy calculation is included. [file 1743-422X-7-369-S2.XLS]

## Sheet: MSA_Output with score
Additional File 2. MSA viral variants frequency and score output
a MSA	Pol_DNA_No_recombinants
b Size	778
c In_Seqs	747
d No. V	e Win start	f Info_E.	g Sequence	h No. seqs	I Score	1	2	3	4	5	6	7	8	9	10	11	12	13	14	15	16	17	18	19	20	21	22	23	24		HXB2 ref genome
1	411	1.36182	AGCAGATGATACGGTATTAGAAGA	1	6.5	0	0	1	1	1	1	1	0.5	0	0	0	0	0	0	0	0	0	0	0	0	0	0	0	0		2333-2356
2	411	1.36182	AGCAGATGACACAGTATTAGAAGG	1	7	0	0	1	1	1	1	1	0.5	0	0.5	0	0	0	0	0	0	0	0	0	0	0	0	0	0
3	411	1.36182	AGCAGATGACACAGTATTAGAGGA	2	3	0	0	0	0	0	0	1	0.5	0	0.5	0	0	0	0	0	0	0	0	0	0	0	0	0	0
4	411	1.36182	AGCTGATGATACAGTATTAGAAGA	1	7	0	0	1	1	1	1	1	0.5	0	0.5	0	0	0	0	0	0	0	0	0	0	0	0	0	0
5	411	1.36182	GGCAGATGATACAGTGTTAGAAGA	1	6	0	0	1	1	1	0	1	0.5	0	0.5	0	0	0	0	0	0	0	0	0	0	0	0	0	0
6	411	1.36182	AGCAGACGATACAGTACTAGAGGA	1	2	0	0	0	0	0	0	1	0.5	0	0.5	0	0	0	0	0	0	0	0	0	0	0	0	0	0
7	411	1.36182	AGCCGATGATACAGTATTAGAAGA	3	7	0	0	1	1	1	1	1	0.5	0	0.5	0	0	0	0	0	0	0	0	0	0	0	0	0	0
8	411	1.36182	AGCAGATGATACAGTAGTAGAAGA	10	6	0	0	1	1	1	0	1	0.5	0	0.5	0	0	0	0	0	0	0	0	0	0	0	0	0	0
9	411	1.36182	AGCAGATGATACAGTGTTAGAAGA	23	6	0	0	1	1	1	0	1	0.5	0	0.5	0	0	0	0	0	0	0	0	0	0	0	0	0	0
10	411	1.36182	AGCAGATGATACAGTATTAGAGGA	12	3	0	0	0	0	0	0	1	0.5	0	0.5	0	0	0	0	0	0	0	0	0	0	0	0	0	0
11	411	1.36182	AGCGGATGATACAGTATTAGAAGA	5	7	0	0	1	1	1	1	1	0.5	0	0.5	0	0	0	0	0	0	0	0	0	0	0	0	0	0
12	411	1.36182	AGCAGATGATACAGCATTAGAAGA	1	6	0	0	1	1	1	0	1	0.5	0	0.5	0	0	0	0	0	0	0	0	0	0	0	0	0	0
13	411	1.36182	AGCAGATGATACCGTATTAGAAGA	3	6.5	0	0	1	1	1	1	1	0.5	0	0	0	0	0	0	0	0	0	0	0	0	0	0	0	0
14	411	1.36182	AGCAGATGATACAGTCTTAGAAGA	6	6	0	0	1	1	1	0	1	0.5	0	0.5	0	0	0	0	0	0	0	0	0	0	0	0	0	0
15	411	1.36182	AGCAGATGATACAGTACTAGAAGA	13	6	0	0	1	1	1	0	1	0.5	0	0.5	0	0	0	0	0	0	0	0	0	0	0	0	0	0
16	411	1.36182	GGCAGACGATACAGTATTAGAAGA	1	7	0	0	1	1	1	1	1	0.5	0	0.5	0	0	0	0	0	0	0	0	0	0	0	0	0	0
17	411	1.36182	AGCAGATGATACAGTATTGGAGGA	1	3	0	0	0	0	0	0	1	0.5	0	0.5	0	0	0	0	0	0	0	0	0	0	0	0	0	0
18	411	1.36182	AGCAGGTGATACAGTATTAGAAGA	2	7	0	0	1	1	1	1	1	0.5	0	0.5	0	0	0	0	0	0	0	0	0	0	0	0	0	0
19	411	1.36182	AGCAGATGATACTGTATTAGAAGA	2	7	0	0	1	1	1	1	1	0.5	0	0.5	0	0	0	0	0	0	0	0	0	0	0	0	0	0
20	411	1.36182	AGCAGATGATACAGTACTAGAGGA	2	3	0	0	0	0	0	0	1	0.5	0	0.5	0	0	0	0	0	0	0	0	0	0	0	0	0	0
21	411	1.36182	AGCAGATGACACAGTGTTAGAAGA	1	6	0	0	1	1	1	0	1	0.5	0	0.5	0	0	0	0	0	0	0	0	0	0	0	0	0	0
22	411	1.36182	AGCAGATGACACAGTATTAGAAGA	21	7	0	0	1	1	1	1	1	0.5	0	0.5	0	0	0	0	0	0	0	0	0	0	0	0	0	0
23	411	1.36182	AGCAGATGGTACAGTATTAGAAGA	1	7	0	0	1	1	1	1	1	0.5	0	0.5	0	0	0	0	0	0	0	0	0	0	0	0	0	0
24	411	1.36182	AGCAGATGATACAGTATTGGAAGA	11	6	0	0	1	1	1	0	1	0.5	0	0.5	0	0	0	0	0	0	0	0	0	0	0	0	0	0
25	411	1.36182	AGCAGATGATACAGTATTAGGAGA	3	4	0	0	1	1	1	0	0	0.5	0	0.5	0	0	0	0	0	0	0	-1	0	0	0	0	0	0
26	411	1.36182	GGCAGATGATACAGTATTGGAAGA	1	6	0	0	1	1	1	0	1	0.5	0	0.5	0	0	0	0	0	0	0	0	0	0	0	0	0	0
27	411	1.36182	GGCAGATGATACAGTATTAGAGGA	2	3	0	0	0	0	0	0	1	0.5	0	0.5	0	0	0	0	0	0	0	0	0	0	0	0	0	0
28	411	1.36182	GGCAGATAATACAGTATTAGAAGA	1	7	0	0	1	1	1	1	1	0.5	0	0.5	0	0	0	0	0	0	0	0	0	0	0	0	0	0
29	411	1.36182	AGCAGATGACACAGTACTAGAAGA	1	6	0	0	1	1	1	0	1	0.5	0	0.5	0	0	0	0	0	0	0	0	0	0	0	0	0	0
30	411	1.36182	AGCAGATGTTACAGTATTAGAAGA	1	7	0	0	1	1	1	1	1	0.5	0	0.5	0	0	0	0	0	0	0	0	0	0	0	0	0	0
31	411	1.36182	AGCAGACGATACGGTATTAGAAGA	1	6.5	0	0	1	1	1	1	1	0.5	0	0	0	0	0	0	0	0	0	0	0	0	0	0	0	0
32	411	1.36182	GGCAGATGATACAGTATTAGAAGA	16	7	0	0	1	1	1	1	1	0.5	0	0.5	0	0	0	0	0	0	0	0	0	0	0	0	0	0
33	411	1.36182	AGCAGATGATGCAGTATTAGAAGA	1	6	0	0	1	1	1	1	1	0.5	0	0.5	0	0	0	0	0	0	0	0	0	0	0	0	-1	0
34	411	1.36182	AGCAGATGATACAGTATTAGAAGA	588	7	0	0	1	1	1	1	1	0.5	0	0.5	0	0	0	0	0	0	0	0	0	0	0	0	0	0
35	411	1.36182	AGCAGACGATACAGTATTAGAAGA	7	7	0	0	1	1	1	1	1	0.5	0	0.5	0	0	0	0	0	0	0	0	0	0	0	0	0	0
a MSA	GENOME_DNA_No_Recombinants
b Size	790
c In_Seqs	760
d No. V	e Win start	f Info_E.	g Sequence	h No. seqs	I Score	1	2	3	4	5	6	7	8	9	10	11	12	13	14	15	16	17	18	19	20	21	22	23	24
1	2928	1.34727	AGCAGATGATACGGTATTAGAAGA	1	6.5	0	0	1	1	1	1	1	0.5	0	0	0	0	0	0	0	0	0	0	0	0	0	0	0	0		2333-2356
2	2928	1.34727	AGCAGATGACACAGTATTAGAAGG	1	7	0	0	1	1	1	1	1	0.5	0	0.5	0	0	0	0	0	0	0	0	0	0	0	0	0	0
3	2928	1.34727	AGCAGATGACACAGTATTAGAGGA	2	3	0	0	0	0	0	0	1	0.5	0	0.5	0	0	0	0	0	0	0	0	0	0	0	0	0	0
4	2928	1.34727	GGCAGATGATACAGTGTTAGAAGA	1	6	0	0	1	1	1	0	1	0.5	0	0.5	0	0	0	0	0	0	0	0	0	0	0	0	0	0
5	2928	1.34727	AGCAGACGATACAGTACTAGAGGA	1	2	0	0	0	0	0	0	1	0.5	0	0.5	0	0	0	0	0	0	0	0	0	0	0	0	0	0
6	2928	1.34727	AGCCGATGATACAGTATTAGAAGA	3	7	0	0	1	1	1	1	1	0.5	0	0.5	0	0	0	0	0	0	0	0	0	0	0	0	0	0
7	2928	1.34727	AGCAGATGATACAGTAGTAGAAGA	11	6	0	0	1	1	1	0	1	0.5	0	0.5	0	0	0	0	0	0	0	0	0	0	0	0	0	0
8	2928	1.34727	AGCAGATGATACAGTGTTAGAAGA	25	6	0	0	1	1	1	0	1	0.5	0	0.5	0	0	0	0	0	0	0	0	0	0	0	0	0	0
9	2928	1.34727	AGCAGATGATACAGTATTAGAGGA	12	3	0	0	0	0	0	0	1	0.5	0	0.5	0	0	0	0	0	0	0	0	0	0	0	0	0	0
10	2928	1.34727	AGCGGATGATACAGTATTAGAAGA	5	7	0	0	1	1	1	1	1	0.5	0	0.5	0	0	0	0	0	0	0	0	0	0	0	0	0	0
11	2928	1.34727	AGCAGATGATACAGCATTAGAAGA	1	6	0	0	1	1	1	0	1	0.5	0	0.5	0	0	0	0	0	0	0	0	0	0	0	0	0	0
12	2928	1.34727	AGCAGATGATACCGTATTAGAAGA	2	6.5	0	0	1	1	1	1	1	0.5	0	0	0	0	0	0	0	0	0	0	0	0	0	0	0	0
13	2928	1.34727	AGCAGATGATACAGTCTTAGAAGA	6	6	0	0	1	1	1	0	1	0.5	0	0.5	0	0	0	0	0	0	0	0	0	0	0	0	0	0
14	2928	1.34727	AGCAGATGATACAGTACTAGAAGA	11	6	0	0	1	1	1	0	1	0.5	0	0.5	0	0	0	0	0	0	0	0	0	0	0	0	0	0
15	2928	1.34727	GGCAGACGATACAGTATTAGAAGA	1	7	0	0	1	1	1	1	1	0.5	0	0.5	0	0	0	0	0	0	0	0	0	0	0	0	0	0
16	2928	1.34727	AGCAGATGATACAGTATTGGAGGA	1	3	0	0	0	0	0	0	1	0.5	0	0.5	0	0	0	0	0	0	0	0	0	0	0	0	0	0
17	2928	1.34727	AGCAGGTGATACAGTATTAGAAGA	2	7	0	0	1	1	1	1	1	0.5	0	0.5	0	0	0	0	0	0	0	0	0	0	0	0	0	0
18	2928	1.34727	AGCAGATGATACTGTATTAGAAGA	2	7	0	0	1	1	1	1	1	0.5	0	0.5	0	0	0	0	0	0	0	0	0	0	0	0	0	0
19	2928	1.34727	AGCAGATGATACAGTACTAGAGGA	3	3	0	0	0	0	0	0	1	0.5	0	0.5	0	0	0	0	0	0	0	0	0	0	0	0	0	0
20	2928	1.34727	AGCAGATGACACAGTGTTAGAAGA	1	6	0	0	1	1	1	0	1	0.5	0	0.5	0	0	0	0	0	0	0	0	0	0	0	0	0	0
21	2928	1.34727	AGCAGATGACACAGTATTAGAAGA	21	7	0	0	1	1	1	1	1	0.5	0	0.5	0	0	0	0	0	0	0	0	0	0	0	0	0	0
22	2928	1.34727	AGCAGATGGTACAGTATTAGAAGA	1	7	0	0	1	1	1	1	1	0.5	0	0.5	0	0	0	0	0	0	0	0	0	0	0	0	0	0
23	2928	1.34727	AGCAGATGATACAGTATTGGAAGA	11	6	0	0	1	1	1	0	1	0.5	0	0.5	0	0	0	0	0	0	0	0	0	0	0	0	0	0
24	2928	1.34727	AGCAGATGATACAGTATTAGGAGA	4	4	0	0	1	1	1	0	0	0.5	0	0.5	0	0	0	0	0	0	0	-1	0	0	0	0	0	0
25	2928	1.34727	GGCAGATGATACAGTATTGGAAGA	1	6	0	0	1	1	1	0	1	0.5	0	0.5	0	0	0	0	0	0	0	0	0	0	0	0	0	0
26	2928	1.34727	GGCAGATGATACAGTATTAGAGGA	2	3	0	0	0	0	0	0	1	0.5	0	0.5	0	0	0	0	0	0	0	0	0	0	0	0	0	0
27	2928	1.34727	GGCAGATAATACAGTATTAGAAGA	1	7	0	0	1	1	1	1	1	0.5	0	0.5	0	0	0	0	0	0	0	0	0	0	0	0	0	0
28	2928	1.34727	AGCAGATGACACAGTACTAGAAGA	1	6	0	0	1	1	1	0	1	0.5	0	0.5	0	0	0	0	0	0	0	0	0	0	0	0	0	0
29	2928	1.34727	AGCAGATGTTACAGTATTAGAAGA	1	7	0	0	1	1	1	1	1	0.5	0	0.5	0	0	0	0	0	0	0	0	0	0	0	0	0	0
30	2928	1.34727	GGCTGATGATACAGTATTAGAAGA	1	7	0	0	1	1	1	1	1	0.5	0	0.5	0	0	0	0	0	0	0	0	0	0	0	0	0	0
31	2928	1.34727	AGCAGACGATACGGTATTAGAAGA	1	6.5	0	0	1	1	1	1	1	0.5	0	0	0	0	0	0	0	0	0	0	0	0	0	0	0	0
32	2928	1.34727	GGCAGATGATACAGTATTAGAAGA	17	7	0	0	1	1	1	1	1	0.5	0	0.5	0	0	0	0	0	0	0	0	0	0	0	0	0	0
33	2928	1.34727	AGCAGATGATACAGTATGAGAAGA	1	6	0	0	1	1	1	0	1	0.5	0	0.5	0	0	0	0	0	0	0	0	0	0	0	0	0	0
34	2928	1.34727	AGCAGATGATACAGTATTAGAAGA	599	7	0	0	1	1	1	1	1	0.5	0	0.5	0	0	0	0	0	0	0	0	0	0	0	0	0	0
35	2928	1.34727	AGCAGACGATACAGTATTAGAAGA	6	7	0	0	1	1	1	1	1	0.5	0	0.5	0	0	0	0	0	0	0	0	0	0	0	0	0	0
a MSA	POL_DNA_GroupM_plus_Recombinants
b Size	1206
c In_Seqs	1143
d No. V	e Win start	f Info_E.	g Sequence	h No. seqs	I Score	1	2	3	4	5	6	7	8	9	10	11	12	13	14	15	16	17	18	19	20	21	22	23	24
1	411	1.41579	AGCAGATGACACAGTATTAGAAGG	1	7	0	0	1	1	1	1	1	0.5	0	0.5	0	0	0	0	0	0	0	0	0	0	0	0	0	0		2333-2356
2	411	1.41579	AGCAGATGACACAGTATTAGAGGA	3	3	0	0	0	0	0	0	1	0.5	0	0.5	0	0	0	0	0	0	0	0	0	0	0	0	0	0
3	411	1.41579	AGCAGACGATACAGTACTAGAGGA	1	2	0	0	0	0	0	0	1	0.5	0	0.5	0	0	0	0	0	0	0	0	0	0	0	0	0	0
4	411	1.41579	CGCAGATGATACAGTATTAGAAGA	1	7	0	0	1	1	1	1	1	0.5	0	0.5	0	0	0	0	0	0	0	0	0	0	0	0	0	0
5	411	1.41579	AGCAGATGATACAGTATTAGAGGA	15	3	0	0	0	0	0	0	1	0.5	0	0.5	0	0	0	0	0	0	0	0	0	0	0	0	0	0
6	411	1.41579	AGCGGATGATACAGTATTAGAAGA	6	7	0	0	1	1	1	1	1	0.5	0	0.5	0	0	0	0	0	0	0	0	0	0	0	0	0	0
7	411	1.41579	AGCAGATGATACCGTATTAGAAGA	3	6.5	0	0	1	1	1	1	1	0.5	0	0	0	0	0	0	0	0	0	0	0	0	0	0	0	0
8	411	1.41579	AGCAGATGATACAGTCTTAGAAGA	9	6	0	0	1	1	1	0	1	0.5	0	0.5	0	0	0	0	0	0	0	0	0	0	0	0	0	0
9	411	1.41579	AGCAGATGATACAGTACTAGAAGA	17	6	0	0	1	1	1	0	1	0.5	0	0.5	0	0	0	0	0	0	0	0	0	0	0	0	0	0
10	411	1.41579	AGCAGATGATACAGTATTAGCAGA	3	4	0	0	1	1	1	0	0	0.5	0	0.5	0	0	0	0	0	0	0	-1	0	0	0	0	0	0
11	411	1.41579	AGCAGATGATACAGTATTGGAGGA	1	3	0	0	0	0	0	0	1	0.5	0	0.5	0	0	0	0	0	0	0	0	0	0	0	0	0	0
12	411	1.41579	AGCAGGTGATACAGTATTAGAAGA	2	7	0	0	1	1	1	1	1	0.5	0	0.5	0	0	0	0	0	0	0	0	0	0	0	0	0	0
13	411	1.41579	AGCAGATGACACAGTGTTAGAAGA	1	6	0	0	1	1	1	0	1	0.5	0	0.5	0	0	0	0	0	0	0	0	0	0	0	0	0	0
14	411	1.41579	AGCAGATGATACAGTATTAGAAGG	2	7	0	0	1	1	1	1	1	0.5	0	0.5	0	0	0	0	0	0	0	0	0	0	0	0	0	0
15	411	1.41579	AGCAGATGATACAGTACTAGCAGA	1	3	0	0	1	1	0	0	0	0.5	0	0.5	0	0	0	0	0	0	0	-1	0	0	0	0	0	0
16	411	1.41579	AGCAGATGACACAGTATTAGAAGA	31	7	0	0	1	1	1	1	1	0.5	0	0.5	0	0	0	0	0	0	0	0	0	0	0	0	0	0
17	411	1.41579	AGCAGATAATACAGTATTCGAAGA	1	6	0	0	1	1	1	0	1	0.5	0	0.5	0	0	0	0	0	0	0	0	0	0	0	0	0	0
18	411	1.41579	AGCAGATGGTACAGTATTAGAAGA	1	7	0	0	1	1	1	1	1	0.5	0	0.5	0	0	0	0	0	0	0	0	0	0	0	0	0	0
19	411	1.41579	GGCAGATGATACAGTATTGGAAGA	1	6	0	0	1	1	1	0	1	0.5	0	0.5	0	0	0	0	0	0	0	0	0	0	0	0	0	0
20	411	1.41579	GGCAGATGATACAGTATTAGAGGA	2	3	0	0	0	0	0	0	1	0.5	0	0.5	0	0	0	0	0	0	0	0	0	0	0	0	0	0
21	411	1.41579	GGCAGATAATACAGTATTAGAAGA	1	7	0	0	1	1	1	1	1	0.5	0	0.5	0	0	0	0	0	0	0	0	0	0	0	0	0	0
22	411	1.41579	AGCAGACGATACGGTATTAGAAGA	1	6.5	0	0	1	1	1	1	1	0.5	0	0	0	0	0	0	0	0	0	0	0	0	0	0	0	0
23	411	1.41579	GGCAGATGATACAGTATTAGAAGA	26	7	0	0	1	1	1	1	1	0.5	0	0.5	0	0	0	0	0	0	0	0	0	0	0	0	0	0
24	411	1.41579	AGCAGATGATGCAGTATTAGAAGA	1	6	0	0	1	1	1	1	1	0.5	0	0.5	0	0	0	0	0	0	0	0	0	0	0	0	-1	0
25	411	1.41579	GGCAGATGACACAGTATTAGAAGA	1	7	0	0	1	1	1	1	1	0.5	0	0.5	0	0	0	0	0	0	0	0	0	0	0	0	0	0
26	411	1.41579	AGCAGATGATACGGTATTAGAAGA	3	6.5	0	0	1	1	1	1	1	0.5	0	0	0	0	0	0	0	0	0	0	0	0	0	0	0	0
27	411	1.41579	AGCTGATGATACAGTATTAGAAGA	4	7	0	0	1	1	1	1	1	0.5	0	0.5	0	0	0	0	0	0	0	0	0	0	0	0	0	0
28	411	1.41579	GGCAGATGATACAGTGTTAGAAGA	1	6	0	0	1	1	1	0	1	0.5	0	0.5	0	0	0	0	0	0	0	0	0	0	0	0	0	0
29	411	1.41579	AGCCGATGATACAGTATTAGAAGA	3	7	0	0	1	1	1	1	1	0.5	0	0.5	0	0	0	0	0	0	0	0	0	0	0	0	0	0
30	411	1.41579	AGCAGATGATACAGTAGTAGAAGA	14	6	0	0	1	1	1	0	1	0.5	0	0.5	0	0	0	0	0	0	0	0	0	0	0	0	0	0
31	411	1.41579	AGCAGATGATACAGTGTTAGAAGA	30	6	0	0	1	1	1	0	1	0.5	0	0.5	0	0	0	0	0	0	0	0	0	0	0	0	0	0
32	411	1.41579	AGCAGATGATACAGCATTAGAAGA	1	6	0	0	1	1	1	0	1	0.5	0	0.5	0	0	0	0	0	0	0	0	0	0	0	0	0	0
33	411	1.41579	AGCTGATGATACAGTAGTAGAAGA	1	6	0	0	1	1	1	0	1	0.5	0	0.5	0	0	0	0	0	0	0	0	0	0	0	0	0	0
34	411	1.41579	GGCAGACGATACAGTATTAGAAGA	1	7	0	0	1	1	1	1	1	0.5	0	0.5	0	0	0	0	0	0	0	0	0	0	0	0	0	0
35	411	1.41579	AGCAGATGATACTGTATTAGAAGA	3	7	0	0	1	1	1	1	1	0.5	0	0.5	0	0	0	0	0	0	0	0	0	0	0	0	0	0
36	411	1.41579	AGCAGATGATACAGTAATAGAAGA	1	7	0	0	1	1	1	1	1	0.5	0	0.5	0	0	0	0	0	0	0	0	0	0	0	0	0	0
37	411	1.41579	AGCAGATGATACAGTACTAGAGGA	3	3	0	0	0	0	0	0	1	0.5	0	0.5	0	0	0	0	0	0	0	0	0	0	0	0	0	0
38	411	1.41579	AGCAGATGATCCAGTATTAGAAGA	1	7	0	0	1	1	1	1	1	0.5	0	0.5	0	0	0	0	0	0	0	0	0	0	0	0	0	0
39	411	1.41579	AGCAGATGATACAGTGTTAGAGGA	2	3	0	0	0	0	0	0	1	0.5	0	0.5	0	0	0	0	0	0	0	0	0	0	0	0	0	0
40	411	1.41579	AGCAGATGATACAGTATTAGGAAG	1	4	0	0	1	1	1	0	0	0.5	0	0.5	0	0	0	0	0	0	0	-1	0	0	0	0	0	0
41	411	1.41579	AGCAGATGATACAGTATTGGAAGA	15	6	0	0	1	1	1	0	1	0.5	0	0.5	0	0	0	0	0	0	0	0	0	0	0	0	0	0
42	411	1.41579	AGCAGATGATACAGTATTAGGAGA	3	4	0	0	1	1	1	0	0	0.5	0	0.5	0	0	0	0	0	0	0	-1	0	0	0	0	0	0
43	411	1.41579	AGCAGATGACACAGTACTAGAAGA	2	6	0	0	1	1	1	0	1	0.5	0	0.5	0	0	0	0	0	0	0	0	0	0	0	0	0	0
44	411	1.41579	AGCAGATGTTACAGTATTAGAAGA	1	7	0	0	1	1	1	1	1	0.5	0	0.5	0	0	0	0	0	0	0	0	0	0	0	0	0	0
45	411	1.41579	AGCAGATGATACAGTATTAGAAGA	913	7	0	0	1	1	1	1	1	0.5	0	0.5	0	0	0	0	0	0	0	0	0	0	0	0	0	0
46	411	1.41579	AGCAGACGATACAGTATTAGAAGA	8	7	0	0	1	1	1	1	1	0.5	0	0.5	0	0	0	0	0	0	0	0	0	0	0	0	0	0
a MSA	GENOME_DNA_GroupM_plus_Recombinants
b Size	1214
c In_Seqs	1153
d No. V	e Win start	f Info_E.	g Sequence	h No. seqs	I Score	1	2	3	4	5	6	7	8	9	10	11	12	13	14	15	16	17	18	19	20	21	22	23	24
1	2928	1.4144	AGCAGATGACACAGTATTAGAAGG	1	7	0	0	1	1	1	1	1	0.5	0	0.5	0	0	0	0	0	0	0	0	0	0	0	0	0	0		2333-2356
2	2928	1.4144	AGCAGATGACACAGTATTAGAGGA	3	3	0	0	0	0	0	0	1	0.5	0	0.5	0	0	0	0	0	0	0	0	0	0	0	0	0	0
3	2928	1.4144	AGCAGACGATACAGTACTAGAGGA	1	2	0	0	0	0	0	0	1	0.5	0	0.5	0	0	0	0	0	0	0	0	0	0	0	0	0	0
4	2928	1.4144	CGCAGATGATACAGTATTAGAAGA	1	7	0	0	1	1	1	1	1	0.5	0	0.5	0	0	0	0	0	0	0	0	0	0	0	0	0	0
5	2928	1.4144	AGCAGATGATACAGTATTAGAGGA	14	3	0	0	0	0	0	0	1	0.5	0	0.5	0	0	0	0	0	0	0	0	0	0	0	0	0	0
6	2928	1.4144	AGCGGATGATACAGTATTAGAAGA	7	7	0	0	1	1	1	1	1	0.5	0	0.5	0	0	0	0	0	0	0	0	0	0	0	0	0	0
7	2928	1.4144	AGCAGATGATACCGTATTAGAAGA	3	6.5	0	0	1	1	1	1	1	0.5	0	0	0	0	0	0	0	0	0	0	0	0	0	0	0	0
8	2928	1.4144	AGCAGATGATACAGTCTTAGAAGA	9	6	0	0	1	1	1	0	1	0.5	0	0.5	0	0	0	0	0	0	0	0	0	0	0	0	0	0
9	2928	1.4144	AGCAGATGATACAGTACTAGAAGA	17	6	0	0	1	1	1	0	1	0.5	0	0.5	0	0	0	0	0	0	0	0	0	0	0	0	0	0
10	2928	1.4144	AGCAGATGATACAGTATTAGCAGA	3	4	0	0	1	1	1	0	0	0.5	0	0.5	0	0	0	0	0	0	0	-1	0	0	0	0	0	0
11	2928	1.4144	AGCAGATGATACAGTATTGGAGGA	1	3	0	0	0	0	0	0	1	0.5	0	0.5	0	0	0	0	0	0	0	0	0	0	0	0	0	0
12	2928	1.4144	AGCAGGTGATACAGTATTAGAAGA	2	7	0	0	1	1	1	1	1	0.5	0	0.5	0	0	0	0	0	0	0	0	0	0	0	0	0	0
13	2928	1.4144	AGCAGATGACACAGTGTTAGAAGA	1	6	0	0	1	1	1	0	1	0.5	0	0.5	0	0	0	0	0	0	0	0	0	0	0	0	0	0
14	2928	1.4144	AGCAGATGATACAGTATTAGAAGG	2	7	0	0	1	1	1	1	1	0.5	0	0.5	0	0	0	0	0	0	0	0	0	0	0	0	0	0
15	2928	1.4144	AGCAGATGATACAGTACTAGCAGA	1	3	0	0	1	1	0	0	0	0.5	0	0.5	0	0	0	0	0	0	0	-1	0	0	0	0	0	0
16	2928	1.4144	AGCAGATGACACAGTATTAGAAGA	31	7	0	0	1	1	1	1	1	0.5	0	0.5	0	0	0	0	0	0	0	0	0	0	0	0	0	0
17	2928	1.4144	AGCAGATGGTACAGTATTAGAAGA	1	7	0	0	1	1	1	1	1	0.5	0	0.5	0	0	0	0	0	0	0	0	0	0	0	0	0	0
18	2928	1.4144	GGCAGATGATACAGTATTGGAAGA	1	6	0	0	1	1	1	0	1	0.5	0	0.5	0	0	0	0	0	0	0	0	0	0	0	0	0	0
19	2928	1.4144	GGCAGATGATACAGTATTAGAGGA	2	3	0	0	0	0	0	0	1	0.5	0	0.5	0	0	0	0	0	0	0	0	0	0	0	0	0	0
20	2928	1.4144	GGCAGATAATACAGTATTAGAAGA	1	7	0	0	1	1	1	1	1	0.5	0	0.5	0	0	0	0	0	0	0	0	0	0	0	0	0	0
21	2928	1.4144	AGCAGACGATACGGTATTAGAAGA	1	6.5	0	0	1	1	1	1	1	0.5	0	0	0	0	0	0	0	0	0	0	0	0	0	0	0	0
22	2928	1.4144	GGCAGATGATACAGTATTAGAAGA	27	7	0	0	1	1	1	1	1	0.5	0	0.5	0	0	0	0	0	0	0	0	0	0	0	0	0	0
23	2928	1.4144	AGCAGATGATACAGTATGAGAAGA	1	6	0	0	1	1	1	0	1	0.5	0	0.5	0	0	0	0	0	0	0	0	0	0	0	0	0	0
24	2928	1.4144	GGCAGATGACACAGTATTAGAAGA	1	7	0	0	1	1	1	1	1	0.5	0	0.5	0	0	0	0	0	0	0	0	0	0	0	0	0	0
25	2928	1.4144	AGCAGATGATACGGTATTAGAAGA	3	6.5	0	0	1	1	1	1	1	0.5	0	0	0	0	0	0	0	0	0	0	0	0	0	0	0	0
26	2928	1.4144	AGCTGATGATACAGTATTAGAAGA	3	7	0	0	1	1	1	1	1	0.5	0	0.5	0	0	0	0	0	0	0	0	0	0	0	0	0	0
27	2928	1.4144	GGCAGATGATACAGTGTTAGAAGA	1	6	0	0	1	1	1	0	1	0.5	0	0.5	0	0	0	0	0	0	0	0	0	0	0	0	0	0
28	2928	1.4144	AGCCGATGATACAGTATTAGAAGA	3	7	0	0	1	1	1	1	1	0.5	0	0.5	0	0	0	0	0	0	0	0	0	0	0	0	0	0
29	2928	1.4144	AGCAGATGATACAGTAGTAGAAGA	16	6	0	0	1	1	1	0	1	0.5	0	0.5	0	0	0	0	0	0	0	0	0	0	0	0	0	0
30	2928	1.4144	AGCAGATGATACAGTGTTAGAAGA	33	6	0	0	1	1	1	0	1	0.5	0	0.5	0	0	0	0	0	0	0	0	0	0	0	0	0	0
31	2928	1.4144	AGCAGATGATACAGCATTAGAAGA	1	6	0	0	1	1	1	0	1	0.5	0	0.5	0	0	0	0	0	0	0	0	0	0	0	0	0	0
32	2928	1.4144	AGCTGATGATACAGTAGTAGAAGA	1	6	0	0	1	1	1	0	1	0.5	0	0.5	0	0	0	0	0	0	0	0	0	0	0	0	0	0
33	2928	1.4144	GGCAGACGATACAGTATTAGAAGA	1	7	0	0	1	1	1	1	1	0.5	0	0.5	0	0	0	0	0	0	0	0	0	0	0	0	0	0
34	2928	1.4144	AGCAGATGATACTGTATTAGAAGA	3	7	0	0	1	1	1	1	1	0.5	0	0.5	0	0	0	0	0	0	0	0	0	0	0	0	0	0
35	2928	1.4144	AGCAGATGATACAGTAATAGAAGA	1	7	0	0	1	1	1	1	1	0.5	0	0.5	0	0	0	0	0	0	0	0	0	0	0	0	0	0
36	2928	1.4144	AGCAGATGATACAGTACTAGAGGA	3	3	0	0	0	0	0	0	1	0.5	0	0.5	0	0	0	0	0	0	0	0	0	0	0	0	0	0
37	2928	1.4144	AGCAGATGATCCAGTATTAGAAGA	1	7	0	0	1	1	1	1	1	0.5	0	0.5	0	0	0	0	0	0	0	0	0	0	0	0	0	0
38	2928	1.4144	AGCAGATGATACAGTGTTAGAGGA	2	3	0	0	0	0	0	0	1	0.5	0	0.5	0	0	0	0	0	0	0	0	0	0	0	0	0	0
39	2928	1.4144	AGCAGATGATACAGTATTAGGAAG	1	4	0	0	1	1	1	0	0	0.5	0	0.5	0	0	0	0	0	0	0	-1	0	0	0	0	0	0
40	2928	1.4144	AGCAGATGATACAGTATTGGAAGA	15	6	0	0	1	1	1	0	1	0.5	0	0.5	0	0	0	0	0	0	0	0	0	0	0	0	0	0
41	2928	1.4144	AGCAGATGATACAGTATTAGGAGA	4	4	0	0	1	1	1	0	0	0.5	0	0.5	0	0	0	0	0	0	0	-1	0	0	0	0	0	0
42	2928	1.4144	AGCAGATGACACAGTACTAGAAGA	2	6	0	0	1	1	1	0	1	0.5	0	0.5	0	0	0	0	0	0	0	0	0	0	0	0	0	0
43	2928	1.4144	AGCAGATGTTACAGTATTAGAAGA	1	7	0	0	1	1	1	1	1	0.5	0	0.5	0	0	0	0	0	0	0	0	0	0	0	0	0	0
44	2928	1.4144	GGCTGATGATACAGTATTAGAAGA	1	7	0	0	1	1	1	1	1	0.5	0	0.5	0	0	0	0	0	0	0	0	0	0	0	0	0	0
45	2928	1.4144	AGCAGATGATACAGTATTAGAAGA	918	7	0	0	1	1	1	1	1	0.5	0	0.5	0	0	0	0	0	0	0	0	0	0	0	0	0	0
46	2928	1.4144	AGCAGACGATACAGTATTAGAAGA	7	7	0	0	1	1	1	1	1	0.5	0	0.5	0	0	0	0	0	0	0	0	0	0	0	0	0	0
a MSA	POL_DNA_All_Subtypes
b Size	1250
c In_Seqs	1160
d No. V	e Win start	f Info_E.	g Sequence	h No. seqs	I Score	1	2	3	4	5	6	7	8	9	10	11	12	13	14	15	16	17	18	19	20	21	22	23	24
1	411	1.59712	AGCAGATGACACAGTGCTAGAAGA	1	4	0	0	1	1	0	0	1	0.5	0	0.5	0	0	0	0	0	0	0	0	0	0	0	0	0	0		2333-2356
2	411	1.59712	AGCAGATGACACAGTATTAGAAGG	1	7	0	0	1	1	1	1	1	0.5	0	0.5	0	0	0	0	0	0	0	0	0	0	0	0	0	0
3	411	1.59712	AGCAGATGACACAGTATTAGAGGA	3	3	0	0	0	0	0	0	1	0.5	0	0.5	0	0	0	0	0	0	0	0	0	0	0	0	0	0
4	411	1.59712	AGCAGACGATACAGTACTAGAGGA	1	2	0	0	0	0	0	0	1	0.5	0	0.5	0	0	0	0	0	0	0	0	0	0	0	0	0	0
5	411	1.59712	CGCAGATGATACAGTATTAGAAGA	1	7	0	0	1	1	1	1	1	0.5	0	0.5	0	0	0	0	0	0	0	0	0	0	0	0	0	0
6	411	1.59712	AGCAGATGATACAGTATTAGAGGA	15	3	0	0	0	0	0	0	1	0.5	0	0.5	0	0	0	0	0	0	0	0	0	0	0	0	0	0
7	411	1.59712	AGCGGATGATACAGTATTAGAAGA	6	7	0	0	1	1	1	1	1	0.5	0	0.5	0	0	0	0	0	0	0	0	0	0	0	0	0	0
8	411	1.59712	AGCAGATGATACCGTATTAGAAGA	3	6.5	0	0	1	1	1	1	1	0.5	0	0	0	0	0	0	0	0	0	0	0	0	0	0	0	0
9	411	1.59712	AGCAGATGATACAGTCTTAGAAGA	9	6	0	0	1	1	1	0	1	0.5	0	0.5	0	0	0	0	0	0	0	0	0	0	0	0	0	0
10	411	1.59712	AGCAGATGATACAGTACTAGAAGA	17	6	0	0	1	1	1	0	1	0.5	0	0.5	0	0	0	0	0	0	0	0	0	0	0	0	0	0
11	411	1.59712	AGCAGATGATACAGTATTAGCAGA	3	4	0	0	1	1	1	0	0	0.5	0	0.5	0	0	0	0	0	0	0	-1	0	0	0	0	0	0
12	411	1.59712	AGCAGATGATACAGTATTGGAGGA	1	3	0	0	0	0	0	0	1	0.5	0	0.5	0	0	0	0	0	0	0	0	0	0	0	0	0	0
13	411	1.59712	AGCAGGTGATACAGTATTAGAAGA	2	7	0	0	1	1	1	1	1	0.5	0	0.5	0	0	0	0	0	0	0	0	0	0	0	0	0	0
14	411	1.59712	AGCAGATGACACAGTGTTAGAAGA	1	6	0	0	1	1	1	0	1	0.5	0	0.5	0	0	0	0	0	0	0	0	0	0	0	0	0	0
15	411	1.59712	AGCAGATGATACAGTATTAGAAGG	3	7	0	0	1	1	1	1	1	0.5	0	0.5	0	0	0	0	0	0	0	0	0	0	0	0	0	0
16	411	1.59712	AGCAGATGATACAGTACTAGCAGA	1	3	0	0	1	1	0	0	0	0.5	0	0.5	0	0	0	0	0	0	0	-1	0	0	0	0	0	0
17	411	1.59712	AGCAGATGACACAGTATTAGAAGA	31	7	0	0	1	1	1	1	1	0.5	0	0.5	0	0	0	0	0	0	0	0	0	0	0	0	0	0
18	411	1.59712	AGCTGATGATACAGTAATAGAAGA	5	7	0	0	1	1	1	1	1	0.5	0	0.5	0	0	0	0	0	0	0	0	0	0	0	0	0	0
19	411	1.59712	AGCAGATAATACAGTATTCGAAGA	1	6	0	0	1	1	1	0	1	0.5	0	0.5	0	0	0	0	0	0	0	0	0	0	0	0	0	0
20	411	1.59712	AGCAGATGGTACAGTATTAGAAGA	1	7	0	0	1	1	1	1	1	0.5	0	0.5	0	0	0	0	0	0	0	0	0	0	0	0	0	0
21	411	1.59712	GGCAGATGATACAGTATTGGAAGA	1	6	0	0	1	1	1	0	1	0.5	0	0.5	0	0	0	0	0	0	0	0	0	0	0	0	0	0
22	411	1.59712	GGCAGATGATACAGTATTAGAGGA	2	3	0	0	0	0	0	0	1	0.5	0	0.5	0	0	0	0	0	0	0	0	0	0	0	0	0	0
23	411	1.59712	GGCAGATAATACAGTATTAGAAGA	1	7	0	0	1	1	1	1	1	0.5	0	0.5	0	0	0	0	0	0	0	0	0	0	0	0	0	0
24	411	1.59712	AGCTGATGATACAGTGATAGAAGA	1	6	0	0	1	1	1	0	1	0.5	0	0.5	0	0	0	0	0	0	0	0	0	0	0	0	0	0
25	411	1.59712	AGCAGACGATACGGTATTAGAAGA	1	6.5	0	0	1	1	1	1	1	0.5	0	0	0	0	0	0	0	0	0	0	0	0	0	0	0	0
26	411	1.59712	GGCAGATGATACAGTATTAGAAGA	26	7	0	0	1	1	1	1	1	0.5	0	0.5	0	0	0	0	0	0	0	0	0	0	0	0	0	0
27	411	1.59712	AGCAGATGATGCAGTATTAGAAGA	1	6	0	0	1	1	1	1	1	0.5	0	0.5	0	0	0	0	0	0	0	0	0	0	0	0	-1	0
28	411	1.59712	AGCTGATGATACAGTAATAGAGAG	1	3	0	0	0	0	0	0	1	0.5	0	0.5	0	0	0	0	0	0	0	0	0	0	0	0	0	0
29	411	1.59712	GGCAGATGACACAGTATTAGAAGA	2	7	0	0	1	1	1	1	1	0.5	0	0.5	0	0	0	0	0	0	0	0	0	0	0	0	0	0
30	411	1.59712	AGCAGATGATACGGTATTAGAAGA	3	6.5	0	0	1	1	1	1	1	0.5	0	0	0	0	0	0	0	0	0	0	0	0	0	0	0	0
31	411	1.59712	AGCTGATGATACAGTATTAGAAGA	4	7	0	0	1	1	1	1	1	0.5	0	0.5	0	0	0	0	0	0	0	0	0	0	0	0	0	0
32	411	1.59712	GGCAGATGATACAGTGTTAGAAGA	1	6	0	0	1	1	1	0	1	0.5	0	0.5	0	0	0	0	0	0	0	0	0	0	0	0	0	0
33	411	1.59712	AGCCGATGATACAGTATTAGAAGA	3	7	0	0	1	1	1	1	1	0.5	0	0.5	0	0	0	0	0	0	0	0	0	0	0	0	0	0
34	411	1.59712	AGCAGATGATACAGTAGTAGAAGA	16	6	0	0	1	1	1	0	1	0.5	0	0.5	0	0	0	0	0	0	0	0	0	0	0	0	0	0
35	411	1.59712	AGCAGATGATACAGTGTTAGAAGA	30	6	0	0	1	1	1	0	1	0.5	0	0.5	0	0	0	0	0	0	0	0	0	0	0	0	0	0
36	411	1.59712	GGCAGATGATACAGTACTAGAGGA	1	2	0	0	0	0	0	0	1	0.5	0	0.5	0	0	0	0	0	0	0	0	0	0	0	0	0	0
37	411	1.59712	AGCAGATGATACAGCATTAGAAGA	1	6	0	0	1	1	1	0	1	0.5	0	0.5	0	0	0	0	0	0	0	0	0	0	0	0	0	0
38	411	1.59712	AGCTGATGATACAGTAGTAGAAGA	1	6	0	0	1	1	1	0	1	0.5	0	0.5	0	0	0	0	0	0	0	0	0	0	0	0	0	0
39	411	1.59712	GGCAGACGATACAGTATTAGAAGA	1	7	0	0	1	1	1	1	1	0.5	0	0.5	0	0	0	0	0	0	0	0	0	0	0	0	0	0
40	411	1.59712	AGCAGATGATACTGTATTAGAAGA	3	7	0	0	1	1	1	1	1	0.5	0	0.5	0	0	0	0	0	0	0	0	0	0	0	0	0	0
41	411	1.59712	AGCAGATGATACAGTAATAGAAGA	1	7	0	0	1	1	1	1	1	0.5	0	0.5	0	0	0	0	0	0	0	0	0	0	0	0	0	0
42	411	1.59712	AGCAGATGATACAGTACTAGAGGA	3	3	0	0	0	0	0	0	1	0.5	0	0.5	0	0	0	0	0	0	0	0	0	0	0	0	0	0
43	411	1.59712	AGCAGATGATCCAGTATTAGAAGA	1	7	0	0	1	1	1	1	1	0.5	0	0.5	0	0	0	0	0	0	0	0	0	0	0	0	0	0
44	411	1.59712	AGCAGATGATACAGTGTTAGAGGA	2	3	0	0	0	0	0	0	1	0.5	0	0.5	0	0	0	0	0	0	0	0	0	0	0	0	0	0
45	411	1.59712	AGCAGATGATACAGTATTAGGAAG	1	4	0	0	1	1	1	0	0	0.5	0	0.5	0	0	0	0	0	0	0	-1	0	0	0	0	0	0
46	411	1.59712	AGCAGATGATACAGTATTGGAAGA	15	6	0	0	1	1	1	0	1	0.5	0	0.5	0	0	0	0	0	0	0	0	0	0	0	0	0	0
47	411	1.59712	AGCAGATGATACAGTATTAGGAGA	3	4	0	0	1	1	1	0	0	0.5	0	0.5	0	0	0	0	0	0	0	-1	0	0	0	0	0	0
48	411	1.59712	AGCAGATGACACAGTACTAGAAGA	2	6	0	0	1	1	1	0	1	0.5	0	0.5	0	0	0	0	0	0	0	0	0	0	0	0	0	0
49	411	1.59712	AGCAGATGTTACAGTATTAGAAGA	1	7	0	0	1	1	1	1	1	0.5	0	0.5	0	0	0	0	0	0	0	0	0	0	0	0	0	0
50	411	1.59712	AGCAGATGATACAGTATTAGAAGA	916	7	0	0	1	1	1	1	1	0.5	0	0.5	0	0	0	0	0	0	0	0	0	0	0	0	0	0
51	411	1.59712	GGCAGATGATACAGTGCTAGAAGA	1	4	0	0	1	1	0	0	1	0.5	0	0.5	0	0	0	0	0	0	0	0	0	0	0	0	0	0
52	411	1.59712	AGCAGACGATACAGTATTAGAAGA	8	7	0	0	1	1	1	1	1	0.5	0	0.5	0	0	0	0	0	0	0	0	0	0	0	0	0	0
a MSA	GENOME_DNA_All_Subtype
b Size	1257
c In_Seqs	1169
d No. V	e Win start	f Info_E.	g Sequence	h No. seqs	I Score	1	2	3	4	5	6	7	8	9	10	11	12	13	14	15	16	17	18	19	20	21	22	23	24
1	2928	1.59825	AGCAGATGACACAGTGCTAGAAGA	1	4	0	0	1	1	0	0	1	0.5	0	0.5	0	0	0	0	0	0	0	0	0	0	0	0	0	0		2333-2356
2	2928	1.59825	AGCAGATGACACAGTATTAGAAGG	1	7	0	0	1	1	1	1	1	0.5	0	0.5	0	0	0	0	0	0	0	0	0	0	0	0	0	0
3	2928	1.59825	AGCAGATGACACAGTATTAGAGGA	3	3	0	0	0	0	0	0	1	0.5	0	0.5	0	0	0	0	0	0	0	0	0	0	0	0	0	0
4	2928	1.59825	AGCAGACGATACAGTACTAGAGGA	1	2	0	0	0	0	0	0	1	0.5	0	0.5	0	0	0	0	0	0	0	0	0	0	0	0	0	0
5	2928	1.59825	CGCAGATGATACAGTATTAGAAGA	1	7	0	0	1	1	1	1	1	0.5	0	0.5	0	0	0	0	0	0	0	0	0	0	0	0	0	0
6	2928	1.59825	AGCAGATGATACAGTATTAGAGGA	14	3	0	0	0	0	0	0	1	0.5	0	0.5	0	0	0	0	0	0	0	0	0	0	0	0	0	0
7	2928	1.59825	AGCGGATGATACAGTATTAGAAGA	7	7	0	0	1	1	1	1	1	0.5	0	0.5	0	0	0	0	0	0	0	0	0	0	0	0	0	0
8	2928	1.59825	AGCAGATGATACCGTATTAGAAGA	3	6.5	0	0	1	1	1	1	1	0.5	0	0	0	0	0	0	0	0	0	0	0	0	0	0	0	0
9	2928	1.59825	AGCAGATGATACAGTCTTAGAAGA	9	6	0	0	1	1	1	0	1	0.5	0	0.5	0	0	0	0	0	0	0	0	0	0	0	0	0	0
10	2928	1.59825	AGCAGATGATACAGTACTAGAAGA	17	6	0	0	1	1	1	0	1	0.5	0	0.5	0	0	0	0	0	0	0	0	0	0	0	0	0	0
11	2928	1.59825	AGCAGATGATACAGTATTAGCAGA	3	4	0	0	1	1	1	0	0	0.5	0	0.5	0	0	0	0	0	0	0	-1	0	0	0	0	0	0
12	2928	1.59825	AGCAGATGATACAGTATTGGAGGA	1	3	0	0	0	0	0	0	1	0.5	0	0.5	0	0	0	0	0	0	0	0	0	0	0	0	0	0
13	2928	1.59825	AGCAGGTGATACAGTATTAGAAGA	2	7	0	0	1	1	1	1	1	0.5	0	0.5	0	0	0	0	0	0	0	0	0	0	0	0	0	0
14	2928	1.59825	AGCAGATGACACAGTGTTAGAAGA	1	6	0	0	1	1	1	0	1	0.5	0	0.5	0	0	0	0	0	0	0	0	0	0	0	0	0	0
15	2928	1.59825	AGCAGATGATACAGTATTAGAAGG	3	7	0	0	1	1	1	1	1	0.5	0	0.5	0	0	0	0	0	0	0	0	0	0	0	0	0	0
16	2928	1.59825	AGCAGATGATACAGTACTAGCAGA	1	3	0	0	1	1	0	0	0	0.5	0	0.5	0	0	0	0	0	0	0	-1	0	0	0	0	0	0
17	2928	1.59825	AGCAGATGACACAGTATTAGAAGA	31	7	0	0	1	1	1	1	1	0.5	0	0.5	0	0	0	0	0	0	0	0	0	0	0	0	0	0
18	2928	1.59825	AGCTGATGATACAGTAATAGAAGA	5	7	0	0	1	1	1	1	1	0.5	0	0.5	0	0	0	0	0	0	0	0	0	0	0	0	0	0
19	2928	1.59825	AGCAGATGGTACAGTATTAGAAGA	1	7	0	0	1	1	1	1	1	0.5	0	0.5	0	0	0	0	0	0	0	0	0	0	0	0	0	0
20	2928	1.59825	GGCAGATGATACAGTATTGGAAGA	1	6	0	0	1	1	1	0	1	0.5	0	0.5	0	0	0	0	0	0	0	0	0	0	0	0	0	0
21	2928	1.59825	GGCAGATGATACAGTATTAGAGGA	2	3	0	0	0	0	0	0	1	0.5	0	0.5	0	0	0	0	0	0	0	0	0	0	0	0	0	0
22	2928	1.59825	GGCAGATAATACAGTATTAGAAGA	1	7	0	0	1	1	1	1	1	0.5	0	0.5	0	0	0	0	0	0	0	0	0	0	0	0	0	0
23	2928	1.59825	AGCTGATGATACAGTGATAGAAGA	1	6	0	0	1	1	1	0	1	0.5	0	0.5	0	0	0	0	0	0	0	0	0	0	0	0	0	0
24	2928	1.59825	AGCAGACGATACGGTATTAGAAGA	1	6.5	0	0	1	1	1	1	1	0.5	0	0	0	0	0	0	0	0	0	0	0	0	0	0	0	0
25	2928	1.59825	GGCAGATGATACAGTATTAGAAGA	27	7	0	0	1	1	1	1	1	0.5	0	0.5	0	0	0	0	0	0	0	0	0	0	0	0	0	0
26	2928	1.59825	AGCAGATGATACAGTATGAGAAGA	1	6	0	0	1	1	1	0	1	0.5	0	0.5	0	0	0	0	0	0	0	0	0	0	0	0	0	0
27	2928	1.59825	AGCTGATGATACAGTAATAGAGAG	1	3	0	0	0	0	0	0	1	0.5	0	0.5	0	0	0	0	0	0	0	0	0	0	0	0	0	0
28	2928	1.59825	GGCAGATGACACAGTATTAGAAGA	2	7	0	0	1	1	1	1	1	0.5	0	0.5	0	0	0	0	0	0	0	0	0	0	0	0	0	0
29	2928	1.59825	AGCAGATGATACGGTATTAGAAGA	3	6.5	0	0	1	1	1	1	1	0.5	0	0	0	0	0	0	0	0	0	0	0	0	0	0	0	0
30	2928	1.59825	AGCTGATGATACAGTATTAGAAGA	3	7	0	0	1	1	1	1	1	0.5	0	0.5	0	0	0	0	0	0	0	0	0	0	0	0	0	0
31	2928	1.59825	GGCAGATGATACAGTGTTAGAAGA	1	6	0	0	1	1	1	0	1	0.5	0	0.5	0	0	0	0	0	0	0	0	0	0	0	0	0	0
32	2928	1.59825	AGCCGATGATACAGTATTAGAAGA	3	7	0	0	1	1	1	1	1	0.5	0	0.5	0	0	0	0	0	0	0	0	0	0	0	0	0	0
33	2928	1.59825	AGCAGATGATACAGTAGTAGAAGA	18	6	0	0	1	1	1	0	1	0.5	0	0.5	0	0	0	0	0	0	0	0	0	0	0	0	0	0
34	2928	1.59825	AGCAGATGATACAGTGTTAGAAGA	33	6	0	0	1	1	1	0	1	0.5	0	0.5	0	0	0	0	0	0	0	0	0	0	0	0	0	0
35	2928	1.59825	GGCAGATGATACAGTACTAGAGGA	1	2	0	0	0	0	0	0	1	0.5	0	0.5	0	0	0	0	0	0	0	0	0	0	0	0	0	0
36	2928	1.59825	AGCAGATGATACAGCATTAGAAGA	1	6	0	0	1	1	1	0	1	0.5	0	0.5	0	0	0	0	0	0	0	0	0	0	0	0	0	0
37	2928	1.59825	AGCTGATGATACAGTAGTAGAAGA	1	6	0	0	1	1	1	0	1	0.5	0	0.5	0	0	0	0	0	0	0	0	0	0	0	0	0	0
38	2928	1.59825	GGCAGACGATACAGTATTAGAAGA	1	7	0	0	1	1	1	1	1	0.5	0	0.5	0	0	0	0	0	0	0	0	0	0	0	0	0	0
39	2928	1.59825	AGCAGATGATACTGTATTAGAAGA	3	7	0	0	1	1	1	1	1	0.5	0	0.5	0	0	0	0	0	0	0	0	0	0	0	0	0	0
40	2928	1.59825	AGCAGATGATACAGTAATAGAAGA	1	7	0	0	1	1	1	1	1	0.5	0	0.5	0	0	0	0	0	0	0	0	0	0	0	0	0	0
41	2928	1.59825	AGCAGATGATACAGTACTAGAGGA	3	3	0	0	0	0	0	0	1	0.5	0	0.5	0	0	0	0	0	0	0	0	0	0	0	0	0	0
42	2928	1.59825	AGCAGATGATCCAGTATTAGAAGA	1	7	0	0	1	1	1	1	1	0.5	0	0.5	0	0	0	0	0	0	0	0	0	0	0	0	0	0
43	2928	1.59825	AGCAGATGATACAGTGTTAGAGGA	2	3	0	0	0	0	0	0	1	0.5	0	0.5	0	0	0	0	0	0	0	0	0	0	0	0	0	0
44	2928	1.59825	AGCAGATGATACAGTATTAGGAAG	1	4	0	0	1	1	1	0	0	0.5	0	0.5	0	0	0	0	0	0	0	-1	0	0	0	0	0	0
45	2928	1.59825	AGCAGATGATACAGTATTGGAAGA	15	6	0	0	1	1	1	0	1	0.5	0	0.5	0	0	0	0	0	0	0	0	0	0	0	0	0	0
46	2928	1.59825	AGCAGATGATACAGTATTAGGAGA	4	4	0	0	1	1	1	0	0	0.5	0	0.5	0	0	0	0	0	0	0	-1	0	0	0	0	0	0
47	2928	1.59825	AGCAGATGACACAGTACTAGAAGA	2	6	0	0	1	1	1	0	1	0.5	0	0.5	0	0	0	0	0	0	0	0	0	0	0	0	0	0
48	2928	1.59825	AGCAGATGTTACAGTATTAGAAGA	1	7	0	0	1	1	1	1	1	0.5	0	0.5	0	0	0	0	0	0	0	0	0	0	0	0	0	0
49	2928	1.59825	GGCTGATGATACAGTATTAGAAGA	1	7	0	0	1	1	1	1	1	0.5	0	0.5	0	0	0	0	0	0	0	0	0	0	0	0	0	0
50	2928	1.59825	AGCAGATGATACAGTATTAGAAGA	920	7	0	0	1	1	1	1	1	0.5	0	0.5	0	0	0	0	0	0	0	0	0	0	0	0	0	0
51	2928	1.59825	GGCAGATGATACAGTGCTAGAAGA	1	4	0	0	1	1	0	0	1	0.5	0	0.5	0	0	0	0	0	0	0	0	0	0	0	0	0	0
52	2928	1.59825	AGCAGACGATACAGTATTAGAAGA	7	7	0	0	1	1	1	1	1	0.5	0	0.5	0	0	0	0	0	0	0	0	0	0	0	0	0	0
a MSA	AZT-3TC-ABC
b Size	52
c In_Seqs	52
d No. V	e Win start	f Info_E.	g Sequence	h No. seqs	I Score	1	2	3	4	5	6	7	8	9	10	11	12	13	14	15	16	17	18	19	20	21	22	23	24
1	153	1.77521	GCCTGAAAATCCATACAACACTCC	1	2	0	0	1	1	0	0	0	0.5	0	0.5	0	0	0	0	0	0	0	-1	0	0	0	0	0	0
2	153	1.77521	GCCTGAAAATCCATATAATACTCC	2	6.5	0	0	1	1	1	1	0	0.5	0	0.5	0.5	0	0	0	0	1	0	-1	0	0	0	0	0	0
3	153	1.77521	GCCTGAAAATCCATATAACACTCC	4	4.5	0	0	1	1	1	0	0	0.5	0	0.5	0.5	0	0	0	0	0	0	-1	0	0	0	0	0	0
4	153	1.77521	GCCTGAAAACCCATATAATACTCC	4	7.5	0	0	1	1	1	1	0	0.5	0	0.5	0.5	0	1	0	0	1	0	-1	0	0	0	0	0	0
5	153	1.77521	GCCTGAAAACCCATACAATACTCC	3	5	0	0	1	1	1	0	0	0.5	0	0.5	0	0	1	0	0	1	0	-1	0	0	0	0	0	0
6	153	1.77521	ACCTGAAAATCCATACAATACTCC	1	5	0	0	1	1	1	0	0	0.5	0	0.5	0	0	0	0	0	1	0	-1	0	0	0	0	0	0
7	153	1.77521	GCCTGAGAATCCATACAATACTCC	2	4.5	0	0	1	1	1	0	0	0.5	0.5	0.5	0	0	0	0	0	1	0	-1	0	0	0	0	0	0
8	153	1.77521	GCCTGAAAATCCATACAATACTCC	33	5	0	0	1	1	1	0	0	0.5	0	0.5	0	0	0	0	0	1	0	-1	0	0	0	0	0	0		2702-2725
9	153	1.77521	GCCTGACAATCCATATAACACTCC	1	3.5	0	0	1	1	1	0	0	0.5	0	0.5	0.5	0	0	0	0	0	0	-1	0	0	0	0	0	0
10	153	1.77521	GCCTGAAAATCCGTACAATACTCC	1	3.5	0	0	1	1	1	0	0	0.5	0	0	0	0	0	0	0	1	0	-1	0	0	0	0	0	0
a MSA	D4T-3TC-NVP
b Size	91
c In_Seqs	79
d No. V	e Win start	f Info_E.	g Sequence	h No. seqs	I Score	1	2	3	4	5	6	7	8	9	10	11	12	13	14	15	16	17	18	19	20	21	22	23	24
1	153	1.90434	ACCTGAAAATCCATACAACACTCC	1	3	0	0	1	1	0	0	0	0.5	0	0.5	0	0	0	0	0	0	0	-1	0	0	0	0	0	0		2702-2725
2	153	1.90434	GCCTGAAAATCCATACAACACTCC	3	2	0	0	1	1	0	0	0	0.5	0	0.5	0	0	0	0	0	0	0	-1	0	0	0	0	0	0
3	153	1.90434	GCCTGAAAATCCATATAATACTCC	6	6.5	0	0	1	1	1	1	0	0.5	0	0.5	0.5	0	0	0	0	1	0	-1	0	0	0	0	0	0
4	153	1.90434	GCCTGAAAATCCATATAACACTCC	6	4.5	0	0	1	1	1	0	0	0.5	0	0.5	0.5	0	0	0	0	0	0	-1	0	0	0	0	0	0
5	153	1.90434	GCCTGAAAACCCATATAATACTCC	1	7.5	0	0	1	1	1	1	0	0.5	0	0.5	0.5	0	1	0	0	1	0	-1	0	0	0	0	0	0
6	153	1.90434	GCCTGAAAACCCATACAATACTCC	4	5	0	0	1	1	1	0	0	0.5	0	0.5	0	0	1	0	0	1	0	-1	0	0	0	0	0	0
7	153	1.90434	ACCTGAAAATCCATACAATACTCC	1	5	0	0	1	1	1	0	0	0.5	0	0.5	0	0	0	0	0	1	0	-1	0	0	0	0	0	0
8	153	1.90434	GCCTGAAAATCCATACAATACTCC	52	5	0	0	1	1	1	0	0	0.5	0	0.5	0	0	0	0	0	1	0	-1	0	0	0	0	0	0
9	153	1.90434	GCCTGACAATCCATATAACACTCC	1	3.5	0	0	1	1	1	0	0	0.5	0	0.5	0.5	0	0	0	0	0	0	-1	0	0	0	0	0	0
10	153	1.90434	GCCTGAAAATCCCTATAATACTCC	1	6	0	0	1	1	1	1	0	0.5	0	0	0.5	0	0	0	0	1	0	-1	0	0	0	0	0	0
11	153	1.90434	GCCTGAAAACCCATACAACACTCC	1	3	0	0	1	1	0	0	0	0.5	0	0.5	0	0	1	0	0	0	0	-1	0	0	0	0	0	0
12	153	1.90434	GCCTGAAAATCCATATAATACACC	1	6.5	0	0	1	1	1	1	0	0.5	0	0.5	0.5	0	0	0	0	1	0	-1	0	0	0	0	0	0
13	153	1.90434	GCCTGAAAATCCTTACAATACACC	1	5	0	0	1	1	1	0	0	0.5	0	0.5	0	0	0	0	0	1	0	-1	0	0	0	0	0	0
a MSA	ZDV-3TC-EFV
b Size	1381
c In_Seqs	1185	1201	1348
d No. V	e Win start	f Info_E.	g Sequence	h No. seqs	I Score	1	2	3	4	5	6	7	8	9	10	11	12	13	14	15	16	17	18	19	20	21	22	23	24
1	7	1.2703	AGTCCTATTGAACCTGTACCAGTA	5	2	0	0.5	0	0	0	0	1	0.5	0	0	0	0	0	0	0	0	0	0	0	-1	0	0	0	0
2	7	1.2703	AGTCCTATTGAAACTGTACCAGCA	4	2	0	0	0	0	0	0	1	0.5	0	0.5	0	0	0	0	0	0	0	0	0	-1	0	0	0	0
3	7	1.2703	AGTCCTATTGACACTGTACCAGTA	8	2.5	0	0.5	0	0	0	0	1	0.5	0	0.5	0	0	0	0	0	0	0	0	0	-1	0	0	0	0
4	7	1.2703	AGTCCTATTGAAACTGTGCCAGTA	21	2.5	0	0.5	0	0	0	0	1	0.5	0	0.5	0	0	0	0	0	0	0	0	0	-1	0	0	0	0
5	7	1.2703	AGTCCTATTGAAACTGTACCAGTA	1013	2.5	0	0.5	0	0	0	0	1	0.5	0	0.5	0	0	0	0	0	0	0	0	0	-1	0	0	0	0
6	7	1.2703	AGTCCTATCGAAACTGTACCAGTA	6	2.5	0	0.5	0	0	0	0	1	0.5	0	0.5	0	0	0	0	0	0	0	0	0	-1	0	0	0	0
7	7	1.2703	AGTCCTATTGATACTGTACCAGTA	3	2.5	0	0.5	0	0	0	0	1	0.5	0	0.5	0	0	0	0	0	0	0	0	0	-1	0	0	0	0
8	7	1.2703	AGTCCTATTGAAACTGCACCAGTA	1	2.5	0	0.5	0	0	0	0	1	0.5	0	0.5	0	0	0	0	0	0	0	0	0	-1	0	0	0	0
9	7	1.2703	AGTCCTATTGAAATTGTACCAGTA	1	2.5	0	0.5	0	0	0	0	1	0.5	0	0.5	0	0	0	0	0	0	0	0	0	-1	0	0	0	0
10	7	1.2703	AGTCCTGTTGAAACTGTACCAGTA	2	4	0	0.5	0	0	0	0	1	0.5	0.5	0.5	0	0	0	0	0	0	0	0	0	0	0	0	0	0
11	7	1.2703	AGTCCTATTGAAACAGTACCAGTA	4	2.5	0	0.5	0	0	0	0	1	0.5	0	0.5	0	0	0	0	0	0	0	0	0	-1	0	0	0	0
12	7	1.2703	AGTCCAATTGAGACGGTACCAGTA	1	2.5	0	0.5	0	0	0	0	1	0.5	0	0.5	0	0	0	0	0	0	0	0	0	0	0	0	0	0
13	7	1.2703	AGTCCTATTGAAACCGTACCAGTA	5	2.5	0	0.5	0	0	0	0	1	0.5	0	0.5	0	0	0	0	0	0	0	0	0	-1	0	0	0	0
14	7	1.2703	AGTCCTATTGAAGCTGTACCAGTA	8	2	0	0.5	0	0	0	0	1	0.5	0	0	0	0	0	0	0	0	0	0	0	-1	0	0	0	0
15	7	1.2703	AGTCCTATTGAAACTGTACCTGTA	14	2.5	0	0.5	0	0	0	0	1	0.5	0	0.5	0	0	0	0	0	0	0	0	0	-1	0	0	0	0
16	7	1.2703	AGTCCTATTGAAACGGTACCAGTA	1	2.5	0	0.5	0	0	0	0	1	0.5	0	0.5	0	0	0	0	0	0	0	0	0	-1	0	0	0	0
17	7	1.2703	ACTCCTATTGAAACTGTACCAGTA	1	2.5	0	0.5	0	0	0	0	1	0.5	0	0.5	0	0	0	0	0	0	0	0	0	-1	0	0	0	0
18	7	1.2703	AGTCCGATTGAAACTGTACCAGTA	1	3.5	0	0.5	0	0	0	0	1	0.5	0	0.5	0	0	0	0	0	0	0	0	0	0	0	0	0	0
19	7	1.2703	AGTCCTATTAAAACTGTACCAGTA	11	2.5	0	0.5	0	0	0	0	1	0.5	0	0.5	0	0	0	0	0	0	0	0	0	-1	0	0	0	0
20	7	1.2703	AGTCCTATTGAAACTGTACCAGTG	6	2	0	0	0	0	0	0	1	0.5	0	0.5	0	0	0	0	0	0	0	0	0	-1	0	0	0	0
21	7	1.2703	AGTCCTACTGAAACTGTACCAGTA	1	2.5	0	0.5	0	0	0	0	1	0.5	0	0.5	0	0	0	0	0	0	0	0	0	-1	0	0	0	0
22	7	1.2703	AGTCCTATTGCAACTGTACCAGTA	1	2.5	0	0.5	0	0	0	0	1	0.5	0	0.5	0	0	0	0	0	0	0	0	0	-1	0	0	0	0
23	7	1.2703	GGTCCTATTGAAACTGTACCAGTA	1	2.5	0	0.5	0	0	0	0	1	0.5	0	0.5	0	0	0	0	0	0	0	0	0	-1	0	0	0	0
24	7	1.2703	AGCTCTATTGAAACTGTACCAGCA	1	2	0	0	0	0	0	0	1	0.5	0	0.5	0	0	0	0	0	0	0	0	0	-1	0	0	0	0
25	7	1.2703	AGTCCTATTGAGACTGTACCAGTA	51	2.5	0	0.5	0	0	0	0	1	0.5	0	0.5	0	0	0	0	0	0	0	0	0	-1	0	0	0	0
26	7	1.2703	AGTCCTATTGAAACTGTACCAGTT	1	2.5	0	0.5	0	0	0	0	1	0.5	0	0.5	0	0	0	0	0	0	0	0	0	-1	0	0	0	0
27	7	1.2703	AGTCCTATTGAAACAGTACCAGTG	13	2	0	0	0	0	0	0	1	0.5	0	0.5	0	0	0	0	0	0	0	0	0	-1	0	0	0	0
W2 for ZDV-3TC-EFV
d No. V	e Win start	f Info_E.	g Sequence	h No. seqs	I Score	1	2	3	4	5	6	7	8	9	10	11	12	13	14	15	16	17	18	19	20	21	22	23	24
1	25	1.51836	CCAGTAAAGTTAAAACCAGGAATG	3	3	0	0	1	0	0	0	1	0	0	0.5	0	0	0	0	0	0	0	0	-0.5	0	0	0	0	0
2	25	1.51836	CCAGTAACATTAAAGCCAGGAATG	2	3	0	0	0	0	0	0	1	0	0	0.5	0	1	0	0	0	0	0	0	-0.5	0	0	0	0	0		2574-2597
3	25	1.51836	CCAGTAAGACTAAAACCAGGAATG	13	3	0	0	1	0	0	0	1	0	0	0.5	0	0	0	0	0	0	0	0	-0.5	0	0	0	0	0
4	25	1.51836	CCAGCAAAATTAAAGCCAGGAATG	7	3	0	0	0	0	0	0	1	0.5	0	0.5	0	0	0	0	0	0	0	0	0	0	0	0	0	0
5	25	1.51836	CCAGTAAGATTAAAGCCAGGAATG	9	2	0	0	0	0	0	0	1	0	0	0.5	0	0	0	0	0	0	0	0	-0.5	0	0	0	0	0
6	25	1.51836	CCAGCAAGATTAAAACCAGGTATG	1	4	0	0	1	0	0	0	1	0.5	0	0.5	0	0	0	0	0	0	0	0	0	0	0	0	0	0
7	25	1.51836	CCAGTAAAATTAAAACCAGGAATG	60	3	0	0	1	0	0	0	1	0	0	0.5	0	0	0	0	0	0	0	0	-0.5	0	0	0	0	0
8	25	1.51836	CCAGTAAGGCTAAAACCAGGAATG	1	2	0	0	1	0	0	0	1	0	0	0.5	0	0	0	0	0	0	0	0	-0.5	0	0	0	0	0
9	25	1.51836	CCAGTAAGATTAAAACCAGGAATG	2	3	0	0	1	0	0	0	1	0	0	0.5	0	0	0	0	0	0	0	0	-0.5	0	0	0	0	0
10	25	1.51836	CCAGTAAAATTAAAGCCAGGAATG	926	2	0	0	0	0	0	0	1	0	0	0.5	0	0	0	0	0	0	0	0	-0.5	0	0	0	0	0
11	25	1.51836	CCAGTAGAATTAAAGCCAGGAATG	1	2.5	0	0	0	0	0	0	1	0	0.5	0.5	0	0	0	0	0	0	0	0	-0.5	0	0	0	0	0
12	25	1.51836	CCAGTAAAATTAAAGCCAGGTATG	13	2	0	0	0	0	0	0	1	0	0	0.5	0	0	0	0	0	0	0	0	-0.5	0	0	0	0	0
13	25	1.51836	CCAGTGAAATTAAAGCCAGGAATG	27	2	0	0	0	0	0	0	1	0	0	0.5	0	0	0	0	0	0	0	0	-0.5	0	0	0	0	0
14	25	1.51836	CCAGTAAAATTAAAGCTAGGAATG	1	3	0	0	1	0	0	0	1	0	0	0.5	0	0	0	0	0	0	0	0	-0.5	0	0	0	0	0
15	25	1.51836	CCAGCAAAATTAAAACCAGGAATG	1	4	0	0	1	0	0	0	1	0.5	0	0.5	0	0	0	0	0	0	0	0	0	0	0	0	0	0
16	25	1.51836	CCAGTGAAATTAAAACCAGGAATG	1	3	0	0	1	0	0	0	1	0	0	0.5	0	0	0	0	0	0	0	0	-0.5	0	0	0	0	0
17	25	1.51836	CCGGTAAAATTAAAGCCAGGAATG	4	2	0	0	0	0	0	0	1	0	0	0.5	0	0	0	0	0	0	0	0	-0.5	0	0	0	0	0
18	25	1.51836	CCAGTAAAATTGAAACCAGGAATG	15	3	0	0	1	0	0	0	1	0	0	0.5	0	0	0	0	0	0	0	0	-0.5	0	0	0	0	0
19	25	1.51836	CCAGTGAAATTGAAACCAGGAATG	1	3	0	0	1	0	0	0	1	0	0	0.5	0	0	0	0	0	0	0	0	-0.5	0	0	0	0	0
20	25	1.51836	CCAGTAAAATCAAAGCCAGGAATG	1	2	0	0	0	0	0	0	1	0	0	0.5	0	0	0	0	0	0	0	0	-0.5	0	0	0	0	0
21	25	1.51836	CCAGCAAAATTAAAGCCAGGTATG	6	3	0	0	0	0	0	0	1	0.5	0	0.5	0	0	0	0	0	0	0	0	0	0	0	0	0	0
22	25	1.51836	CCAGTAAAACTAAAGCCAGGAATG	3	2	0	0	0	0	0	0	1	0	0	0.5	0	0	0	0	0	0	0	0	-0.5	0	0	0	0	0
23	25	1.51836	CCAGTACAATTAAAGCCAGGAATG	2	2	0	0	0	0	0	0	1	0	0	0.5	0	0	0	0	0	0	0	0	-0.5	0	0	0	0	0
24	25	1.51836	CCAGTAAAATTAAAGCCAGGACTG	2	2	0	0	0	0	0	0	1	0	0	0.5	0	0	0	0	0	0	0	0	-0.5	0	0	0	0	0
25	25	1.51836	CCAGTAAAGTTAAAGCCAGGAATG	17	2	0	0	0	0	0	0	1	0	0	0.5	0	0	0	0	0	0	0	0	-0.5	0	0	0	0	0
26	25	1.51836	CCAGTAAAATTGAAGCCAGGAATG	48	2	0	0	0	0	0	0	1	0	0	0.5	0	0	0	0	0	0	0	0	-0.5	0	0	0	0	0
27	25	1.51836	CCAGTAAAACTAAAACCAGGAATG	2	3	0	0	1	0	0	0	1	0	0	0.5	0	0	0	0	0	0	0	0	-0.5	0	0	0	0	0
28	25	1.51836	CCAGTAAAATTAAGGCCAGGAATG	7	2	0	0	0	0	0	0	1	0	0	0.5	0	0	0	0	0	0	0	0	-0.5	0	0	0	0	0
29	25	1.51836	CCTGTAAAATTAAAGCCAGGAATG	14	2	0	0	0	0	0	0	1	0	0	0.5	0	0	0	0	0	0	0	0	-0.5	0	0	0	0	0
30	25	1.51836	CCAGTAAAATTAAAGCCAGGAGTG	11	2	0	0	0	0	0	0	1	0	0	0.5	0	0	0	0	0	0	0	0	-0.5	0	0	0	0	0
W3 for ZDV-3TC-EFV
d No. V	e Win start	f Info_E.	g Sequence	h No. seqs	I Score	1	2	3	4	5	6	7	8	9	10	11	12	13	14	15	16	17	18	19	20	21	22	23	24
1	153	1.93957	GCCTGAAAATCCATACAACACTCC	29	2	0	0	1	1	0	0	0	0.5	0	0.5	0	0	0	0	0	0	0	-1	0	0	0	0	0	0		2702-2725
2	153	1.93957	GCCTGAGAATCCATATAATACTCC	8	7	0	0	1	1	1	1	0	0.5	0.5	0.5	0.5	0	0	0	0	1	0	-1	0	0	0	0	0	0
3	153	1.93957	GCCTGAAAATCCGCACAATACTCC	1	3.5	0	0	1	1	1	0	0	0.5	0	0	0	0	0	0	0	1	0	-1	0	0	0	0	0	0
4	153	1.93957	GCCTGAAAATCCATACAACACACC	1	2	0	0	1	1	0	0	0	0.5	0	0.5	0	0	0	0	0	0	0	-1	0	0	0	0	0	0
5	153	1.93957	GCCTGAGAATCCATACAACACTCC	4	2.5	0	0	1	1	0	0	0	0.5	0.5	0.5	0	0	0	0	0	0	0	-1	0	0	0	0	0	0
6	153	1.93957	GCCTGAAAATCCATATAATACTCC	223	6.5	0	0	1	1	1	1	0	0.5	0	0.5	0.5	0	0	0	0	1	0	-1	0	0	0	0	0	0
7	153	1.93957	GGCTGAAAATCCATACAATACTCC	1	5	0	0	1	1	1	0	0	0.5	0	0.5	0	0	0	0	0	1	0	-1	0	0	0	0	0	0
8	153	1.93957	GCCTGAGAACCCATACAATACTCC	2	5.5	0	0	1	1	1	0	0	0.5	0.5	0.5	0	0	1	0	0	1	0	-1	0	0	0	0	0	0
9	153	1.93957	GCCTGGAAATCCGTACAATACTCC	1	3.5	0	0	1	1	1	0	0	0.5	0	0	0	0	0	0	0	1	0	-1	0	0	0	0	0	0
10	153	1.93957	GCCTGAAGACCCATACAATACTCC	1	5	0	0	1	1	1	0	0	0.5	0	0.5	0	0	1	0	0	1	0	-1	0	0	0	0	0	0
11	153	1.93957	GCCTGAAGATCCATACAATACTCC	1	4	0	0	1	1	1	0	0	0.5	0	0.5	0	0	0	0	0	1	0	-1	0	0	0	0	0	0
12	153	1.93957	GCCTGAGAATCCATACAATACTCC	22	4.5	0	0	1	1	1	0	0	0.5	0.5	0.5	0	0	0	0	0	1	0	-1	0	0	0	0	0	0
13	153	1.93957	GCCTGAAATCCCATACAATACTCC	1	5	0	0	1	1	1	0	0	0.5	0	0.5	0	0	1	0	0	1	0	-1	0	0	0	0	0	0
14	153	1.93957	GCCTGAAAGTCCATATAATACTCC	2	6.5	0	0	1	1	1	1	0	0.5	0	0.5	0.5	0	0	0	0	1	0	-1	0	0	0	0	0	0
15	153	1.93957	GCCTGAAAATCCATACAATCCTCC	1	2	0	0	1	1	0	0	0	0.5	0	0.5	0	0	0	0	0	0	0	-1	0	0	0	0	0	0
16	153	1.93957	GCCTGAAAATCCATACAATACTCC	741	5	0	0	1	1	1	0	0	0.5	0	0.5	0	0	0	0	0	1	0	-1	0	0	0	0	0	0
17	153	1.93957	GCCCGAAAATCCGTACAATACTCC	2	3.5	0	0	1	1	1	0	0	0.5	0	0	0	0	0	0	0	1	0	-1	0	0	0	0	0	0
18	153	1.93957	GCCTGAAAATCCGTACAATACTCC	42	3.5	0	0	1	1	1	0	0	0.5	0	0	0	0	0	0	0	1	0	-1	0	0	0	0	0	0
19	153	1.93957	GCCTGACAACCCATATAACACTCC	1	4.5	0	0	1	1	1	0	0	0.5	0	0.5	0.5	0	1	0	0	0	0	-1	0	0	0	0	0	0
20	153	1.93957	ACCTGAAAATCCATATAATACTCC	2	6.5	0	0	1	1	1	1	0	0.5	0	0.5	0.5	0	0	0	0	1	0	-1	0	0	0	0	0	0
21	153	1.93957	GCCCGAAAATCCATACAACACTCC	1	2	0	0	1	1	0	0	0	0.5	0	0.5	0	0	0	0	0	0	0	-1	0	0	0	0	0	0
22	153	1.93957	GCCTGAAAGTCCCTACAATACTCC	1	3.5	0	0	1	1	1	0	0	0.5	0	0	0	0	0	0	0	1	0	-1	0	0	0	0	0	0
23	153	1.93957	GCCTGACAATCCATATAATACTCC	1	6.5	0	0	1	1	1	1	0	0.5	0	0.5	0.5	0	0	0	0	1	0	-1	0	0	0	0	0	0
24	153	1.93957	GCCTGAAAATCCATATAGTACTCC	1	5.5	0	0	1	1	1	0	0	0.5	0	0.5	0.5	0	0	0	0	1	0	-1	0	0	0	0	0	0
25	153	1.93957	GCCTGAAAACCCATACAATACTCC	62	5	0	0	1	1	1	0	0	0.5	0	0.5	0	0	1	0	0	1	0	-1	0	0	0	0	0	0
26	153	1.93957	ACCTGAAAATCCATACAATACTCC	43	5	0	0	1	1	1	0	0	0.5	0	0.5	0	0	0	0	0	1	0	-1	0	0	0	0	0	0
27	153	1.93957	GCCTGAGAATCCATACAATGCTCC	1	2.5	0	0	1	1	0	0	0	0.5	0.5	0.5	0	0	0	0	0	0	0	-1	0	0	0	0	0	0
28	153	1.93957	GCCTGAAAATCCATACGATACTCC	2	3	0	0	1	1	0	0	0	0.5	0	0.5	0	0	0	0	0	1	0	-1	0	0	0	0	0	0
29	153	1.93957	GCCTGGAAACCCATACAATACTCC	1	5	0	0	1	1	1	0	0	0.5	0	0.5	0	0	1	0	0	1	0	-1	0	0	0	0	0	0
30	153	1.93957	GCCTGAAAATCCTTACAATACTCC	1	5	0	0	1	1	1	0	0	0.5	0	0.5	0	0	0	0	0	1	0	-1	0	0	0	0	0	0
31	153	1.93957	GCCTGAAAATCCCTACAATACTCC	67	3.5	0	0	1	1	1	0	0	0.5	0	0	0	0	0	0	0	1	0	-1	0	0	0	0	0	0
32	153	1.93957	GCCTGAAAATCCATACAGTACTCC	4	3	0	0	1	1	0	0	0	0.5	0	0.5	0	0	0	0	0	1	0	-1	0	0	0	0	0	0
33	153	1.93957	GCCCGAGAATCCATACAATACTCC	4	4.5	0	0	1	1	1	0	0	0.5	0.5	0.5	0	0	0	0	0	1	0	-1	0	0	0	0	0	0
34	153	1.93957	GCCTGAAAACCCATATAACACTCC	3	4.5	0	0	1	1	1	0	0	0.5	0	0.5	0.5	0	1	0	0	0	0	-1	0	0	0	0	0	0
35	153	1.93957	GCCTGAAAGCCCATACAATACTCC	1	5	0	0	1	1	1	0	0	0.5	0	0.5	0	0	1	0	0	1	0	-1	0	0	0	0	0	0
36	153	1.93957	GCCCGAAAATCCATATAATACTCC	1	6.5	0	0	1	1	1	1	0	0.5	0	0.5	0.5	0	0	0	0	1	0	-1	0	0	0	0	0	0
37	153	1.93957	GCCTGAAAACCCATATAATACTCC	5	7.5	0	0	1	1	1	1	0	0.5	0	0.5	0.5	0	1	0	0	1	0	-1	0	0	0	0	0	0
38	153	1.93957	GCCTGGGAATCCATACAATACTCC	1	4.5	0	0	1	1	1	0	0	0.5	0.5	0.5	0	0	0	0	0	1	0	-1	0	0	0	0	0	0
39	153	1.93957	ACCTGAAAATCCATATAACACTCC	7	4.5	0	0	1	1	1	0	0	0.5	0	0.5	0.5	0	0	0	0	0	0	-1	0	0	0	0	0	0
40	153	1.93957	GCCTGAAAATCCCTATAATACTCC	1	6	0	0	1	1	1	1	0	0.5	0	0	0.5	0	0	0	0	1	0	-1	0	0	0	0	0	0
41	153	1.93957	GCCCGAAAATCCATACAATACTCC	10	4	0	0	1	1	1	0	0	0.5	0	0.5	0	0	0	0	0	1	0	-1	0	0	0	0	0	0
42	153	1.93957	GCCTGAAAATCTATACAATACTCC	1	5	0	0	1	1	1	0	0	0.5	0	0.5	0	0	0	0	0	1	0	-1	0	0	0	0	0	0
43	153	1.93957	GCCTGAAAGTCCATACAATACTCC	5	4	0	0	1	1	1	0	0	0.5	0	0.5	0	0	0	0	0	1	0	-1	0	0	0	0	0	0
44	153	1.93957	GCCTGAACATCCATATAATACTCC	1	7.5	0	0	1	1	1	1	0	0.5	0	0.5	0.5	1	0	0	0	1	0	-1	0	0	0	0	0	0
45	153	1.93957	GCCTGAAAACCCATACAACACTCC	3	3	0	0	1	1	0	0	0	0.5	0	0.5	0	0	1	0	0	0	0	-1	0	0	0	0	0	0
46	153	1.93957	GCCTGACAATCCATACAATACTCC	1	4	0	0	1	1	1	0	0	0.5	0	0.5	0	0	0	0	0	1	0	-1	0	0	0	0	0	0
47	153	1.93957	ACCTGAAAATCCATACAACACTCC	8	3	0	0	1	1	0	0	0	0.5	0	0.5	0	0	0	0	0	0	0	-1	0	0	0	0	0	0
48	153	1.93957	GCCTGAAAATTCATACAATACTCC	1	5	0	0	1	1	1	0	0	0.5	0	0.5	0	0	0	0	0	1	0	-1	0	0	0	0	0	0
49	153	1.93957	GCCTGAAAATCCATATAACACTCC	19	4.5	0	0	1	1	1	0	0	0.5	0	0.5	0.5	0	0	0	0	0	0	-1	0	0	0	0	0	0
50	153	1.93957	GCCTGGAAATCCATACAATACTCC	2	4	0	0	1	1	1	0	0	0.5	0	0.5	0	0	0	0	0	1	0	-1	0	0	0	0	0	0
51	153	1.93957	GCCTGAAAATCCCTACGATACTCC	1	2.5	0	0	1	1	0	0	0	0.5	0	0	0	0	0	0	0	1	0	-1	0	0	0	0	0	0
52	153	1.93957	GCCTGAAAATCCACACAATACTCC	1	4	0	0	1	1	1	0	0	0.5	0	0.5	0	0	0	0	0	1	0	-1	0	0	0	0	0	0
53	153	1.93957	GCCTGAAAATCAATACAACACTCC	1	3	0	0	1	1	0	0	0	0.5	0	0.5	0	0	0	0	0	0	0	-1	0	0	0	0	0	0
a MSA	2299_Resistant_Isolates
b Size	2299
c In_Seqs	1552	1564
d No. V	e Win start	f Info_E.	g Sequence	h No. seqs	I Score	1	2	3	4	5	6	7	8	9	10	11	12	13	14	15	16	17	18	19	20	21	22	23	24
1	2582	1.71596	CCAGTGACATTAAAGCCAGGAATG	1	2	0	0	0	0	0	0	1	0	0	0.5	0	1	0	0	0	0	0	0	-0.5	0	0	0	0	0		2574-2597
2	2582	1.71596	CCAGTAAAGTTAAAACCAGGAATG	2	3	0	0	1	0	0	0	1	0	0	0.5	0	0	0	0	0	0	0	0	-0.5	0	0	0	0	0
3	2582	1.71596	CCAGTAACATTAAAGCCAGGAATG	14	3	0	0	0	0	0	0	1	0	0	0.5	0	1	0	0	0	0	0	0	-0.5	0	0	0	0	0
4	2582	1.71596	CCAGTAAGATTAAAACCAGGAATG	1	3	0	0	1	0	0	0	1	0	0	0.5	0	0	0	0	0	0	0	0	-0.5	0	0	0	0	0
5	2582	1.71596	CCAGTAAAATTAAAGCCAGGAATG	1255	2	0	0	0	0	0	0	1	0	0	0.5	0	0	0	0	0	0	0	0	-0.5	0	0	0	0	0
6	2582	1.71596	CCAGTAAAATTAAAGCCAGGTATG	2	2	0	0	0	0	0	0	1	0	0	0.5	0	0	0	0	0	0	0	0	-0.5	0	0	0	0	0
7	2582	1.71596	CCAGTACCATTAAAACCAGGAATG	1	4	0	0	1	0	0	0	1	0	0	0.5	0	1	0	0	0	0	0	0	-0.5	0	0	0	0	0
8	2582	1.71596	CCAGTAAAACTAAAGCCTGGAATG	1	2	0	0	0	0	0	0	1	0	0	0.5	0	0	0	0	0	0	0	0	-0.5	0	0	0	0	0
9	2582	1.71596	CCAGTACAATTAAAGCCAGGAATG	2	2	0	0	0	0	0	0	1	0	0	0.5	0	0	0	0	0	0	0	0	-0.5	0	0	0	0	0
10	2582	1.71596	CCAGTAAAGTTAAAGCCAGGAATG	16	2	0	0	0	0	0	0	1	0	0	0.5	0	0	0	0	0	0	0	0	-0.5	0	0	0	0	0
11	2582	1.71596	CCAGTAAAATTGAAGCCAGGAATG	77	2	0	0	0	0	0	0	1	0	0	0.5	0	0	0	0	0	0	0	0	-0.5	0	0	0	0	0
12	2582	1.71596	CCAGTAAAACTAAAACCAGGAATG	2	3	0	0	1	0	0	0	1	0	0	0.5	0	0	0	0	0	0	0	0	-0.5	0	0	0	0	0
13	2582	1.71596	CCTGTAAAATTAAAACCAGGAATG	2	3	0	0	1	0	0	0	1	0	0	0.5	0	0	0	0	0	0	0	0	-0.5	0	0	0	0	0
14	2582	1.71596	CCAGTAAAATTAAACCCAGGAATG	6	2	0	0	0	0	0	0	1	0	0	0.5	0	0	0	0	0	0	0	0	-0.5	0	0	0	0	0
15	2582	1.71596	CCAGTAAGATTAAAGCCAGGAATG	12	2	0	0	0	0	0	0	1	0	0	0.5	0	0	0	0	0	0	0	0	-0.5	0	0	0	0	0
16	2582	1.71596	CCAGTAAAATTAAAACCAGGAATG	74	3	0	0	1	0	0	0	1	0	0	0.5	0	0	0	0	0	0	0	0	-0.5	0	0	0	0	0
17	2582	1.71596	CCAGTGAAATTAAAGCCAGGAATG	18	2	0	0	0	0	0	0	1	0	0	0.5	0	0	0	0	0	0	0	0	-0.5	0	0	0	0	0			1
18	2582	1.71596	CCAGTGAAATTAAAACCAGGAATG	2	3	0	0	1	0	0	0	1	0	0	0.5	0	0	0	0	0	0	0	0	-0.5	0	0	0	0	0
19	2582	1.71596	CCGGTAAAATTAAAGCCAGGAATG	4	2	0	0	0	0	0	0	1	0	0	0.5	0	0	0	0	0	0	0	0	-0.5	0	0	0	0	0
20	2582	1.71596	CCAGTAACATTGAAGCCAGGAATG	1	2	0	0	0	0	0	0	1	0	0	0.5	0	1	0	0	0	0	0	0	-0.5	0	0	0	0	0
21	2582	1.71596	CCAGTAAAATTGAAACCAGGAATG	8	3	0	0	1	0	0	0	1	0	0	0.5	0	0	0	0	0	0	0	0	-0.5	0	0	0	0	0
22	2582	1.71596	CCAGTGAAATTGAAACCAGGAATG	1	3	0	0	1	0	0	0	1	0	0	0.5	0	0	0	0	0	0	0	0	-0.5	0	0	0	0	0
23	2582	1.71596	CCAGTAAAACTAAAGCCAGGAATG	23	2	0	0	0	0	0	0	1	0	0	0.5	0	0	0	0	0	0	0	0	-0.5	0	0	0	0	0
24	2582	1.71596	CCAGTAAAATTAAAGCCAGGAGTG	8	2	0	0	0	0	0	0	1	0	0	0.5	0	0	0	0	0	0	0	0	-0.5	0	0	0	0	0
25	2582	1.71596	CCTGTAAAATTAAAGCCAGGAATG	14	2	0	0	0	0	0	0	1	0	0	0.5	0	0	0	0	0	0	0	0	-0.5	0	0	0	0	0
26	2582	1.71596	CCAGTAACATTAAAACCAGGAATG	5	4	0	0	1	0	0	0	1	0	0	0.5	0	1	0	0	0	0	0	0	-0.5	0	0	0	0	0
W2 for 2299_Resistant_Isolates
d No. V	e Win start	f Info_E.	g Sequence	h No. seqs	I Score	1	2	3	4	5	6	7	8	9	10	11	12	13	14	15	16	17	18	19	20	21	22	23	24
1	10324	1.70697	CCTGTAAAATTAAAGCCAGGAATG	14	2	0	0	0	0	0	0	1	0	0	0.5	0	0	0	0	0	0	0	0	-0.5	0	0	0	0	0		2574-2597
2	10324	1.70697	CCAGTAAAGTTAAAACCAGGAATG	2	3	0	0	1	0	0	0	1	0	0	0.5	0	0	0	0	0	0	0	0	-0.5	0	0	0	0	0
3	10324	1.70697	CCAGTAAAATTAAACCCAGGAATG	6	2	0	0	0	0	0	0	1	0	0	0.5	0	0	0	0	0	0	0	0	-0.5	0	0	0	0	0
4	10324	1.70697	CCAGTGAAATTAAAGCCAGGAATG	18	2	0	0	0	0	0	0	1	0	0	0.5	0	0	0	0	0	0	0	0	-0.5	0	0	0	0	0
5	10324	1.70697	CCAGTAACATTAAAACCAGGAATG	5	4	0	0	1	0	0	0	1	0	0	0.5	0	1	0	0	0	0	0	0	-0.5	0	0	0	0	0
6	10324	1.70697	CCAGTAAAGTTAAAGCCAGGAATG	16	2	0	0	0	0	0	0	1	0	0	0.5	0	0	0	0	0	0	0	0	-0.5	0	0	0	0	0
7	10324	1.70697	CCAGTAAAATTGAAGCCAGGAATG	77	2	0	0	0	0	0	0	1	0	0	0.5	0	0	0	0	0	0	0	0	-0.5	0	0	0	0	0
8	10324	1.70697	CCAGTAACATTGAAGCCAGGAATG	1	2	0	0	0	0	0	0	1	0	0	0.5	0	1	0	0	0	0	0	0	-0.5	0	0	0	0	0
9	10324	1.70697	CCAGTAAAATTGAAACCAGGAATG	8	3	0	0	1	0	0	0	1	0	0	0.5	0	0	0	0	0	0	0	0	-0.5	0	0	0	0	0
10	10324	1.70697	CCAGTGAAATTAAAACCAGGAATG	2	3	0	0	1	0	0	0	1	0	0	0.5	0	0	0	0	0	0	0	0	-0.5	0	0	0	0	0
11	10324	1.70697	CCAGTGACATTAAAGCCAGGAATG	1	2	0	0	0	0	0	0	1	0	0	0.5	0	1	0	0	0	0	0	0	-0.5	0	0	0	0	0
12	10324	1.70697	CCAGTAAAACTAAAGCCTGGAATG	1	2	0	0	0	0	0	0	1	0	0	0.5	0	0	0	0	0	0	0	0	-0.5	0	0	0	0	0
13	10324	1.70697	CCAGTAAAATTAAAGCCAGGAGTG	8	2	0	0	0	0	0	0	1	0	0	0.5	0	0	0	0	0	0	0	0	-0.5	0	0	0	0	0
14	10324	1.70697	CCTGTAAAATTAAAACCAGGAATG	2	3	0	0	1	0	0	0	1	0	0	0.5	0	0	0	0	0	0	0	0	-0.5	0	0	0	0	0
15	10324	1.70697	CCAGTAAAATTAAAACCAGGAATG	74	3	0	0	1	0	0	0	1	0	0	0.5	0	0	0	0	0	0	0	0	-0.5	0	0	0	0	0
16	10324	1.70697	CCAGTGAAATTGAAACCAGGAATG	1	3	0	0	1	0	0	0	1	0	0	0.5	0	0	0	0	0	0	0	0	-0.5	0	0	0	0	0
17	10324	1.70697	CCAGTAAAATTAAAGCCAGGTATG	2	2	0	0	0	0	0	0	1	0	0	0.5	0	0	0	0	0	0	0	0	-0.5	0	0	0	0	0
18	10324	1.70697	CCAGTAAAACTAAAACCAGGAATG	2	3	0	0	1	0	0	0	1	0	0	0.5	0	0	0	0	0	0	0	0	-0.5	0	0	0	0	0
19	10324	1.70697	CCGGTAAAATTAAAGCCAGGAATG	4	2	0	0	0	0	0	0	1	0	0	0.5	0	0	0	0	0	0	0	0	-0.5	0	0	0	0	0
20	10324	1.70697	CCAGTAACATTAAAGCCAGGAATG	14	3	0	0	0	0	0	0	1	0	0	0.5	0	1	0	0	0	0	0	0	-0.5	0	0	0	0	0
21	10324	1.70697	CCAGTAAGATTAAAACCAGGAATG	1	3	0	0	1	0	0	0	1	0	0	0.5	0	0	0	0	0	0	0	0	-0.5	0	0	0	0	0
22	10324	1.70697	CCAGTAAAATTAAAGCCAGGAATG	1267	2	0	0	0	0	0	0	1	0	0	0.5	0	0	0	0	0	0	0	0	-0.5	0	0	0	0	0
23	10324	1.70697	CCAGTACCATTAAAACCAGGAATG	1	4	0	0	1	0	0	0	1	0	0	0.5	0	1	0	0	0	0	0	0	-0.5	0	0	0	0	0
24	10324	1.70697	CCAGTACAATTAAAGCCAGGAATG	2	2	0	0	0	0	0	0	1	0	0	0.5	0	0	0	0	0	0	0	0	-0.5	0	0	0	0	0
25	10324	1.70697	CCAGTAAGATTAAAGCCAGGAATG	12	2	0	0	0	0	0	0	1	0	0	0.5	0	0	0	0	0	0	0	0	-0.5	0	0	0	0	0
26	10324	1.70697	CCAGTAAAACTAAAGCCAGGAATG	23	2	0	0	0	0	0	0	1	0	0	0.5	0	0	0	0	0	0	0	0	-0.5	0	0	0	0	0
a MSA	Name of the multiple sequence alignment (MSA) tested
b Size	Numer of initial sequences in the alignment, some these sequences are rejected
c In_Seqs	Number of sequences used in the analysis
d No. V	Each of the different sequences found for an sliding window of 23 nts
e Win start	Position of the window in the analyzed alignment, not with respect HXB2
f Info_E	Information Entropy
g Sequence	Nucleotide sequence for each viral variant in the 23 sliding window
h No. seqs	Number of sequences that have that sequence, frequency
I Score	total value from adding individual sequence features
The table shows a summary of the algorithm output obtained for each MSA and corresponds to the raw data without analysis. All the different viral variants obtained for each MSA is shown. Each of the sequence variants obtained for each MSA can be further analyze with different algorithm parameters, and for different purposes. Sequence features are specified for each of the sequence variants found.

## Sheet: MSA_Output_without Score 
a MSA	Pol_DNA_No_recombinants
b Size	778
c In_Seqs	747
d No. V	e Win start	f Info_E.	g Sequence	h No. seqs	I Score	1	2	3	4	5	6	7	8	9	10	11	12	13	14	15	16	17	18	19	20	21	22	23	24		HXB2 ref genome
1	411	1.36182	AGCAGATGATACGGTATTAGAAGA	1	6.5	0	0	1	1	1	1	1	0.5	0	0	0	0	0	0	0	0	0	0	0	0	0	0	0	0		2333-2356
2	411	1.36182	AGCAGATGACACAGTATTAGAAGG	1	7	0	0	1	1	1	1	1	0.5	0	0.5	0	0	0	0	0	0	0	0	0	0	0	0	0	0
3	411	1.36182	AGCAGATGACACAGTATTAGAGGA	2	3	0	0	0	0	0	0	1	0.5	0	0.5	0	0	0	0	0	0	0	0	0	0	0	0	0	0
4	411	1.36182	AGCTGATGATACAGTATTAGAAGA	1	7	0	0	1	1	1	1	1	0.5	0	0.5	0	0	0	0	0	0	0	0	0	0	0	0	0	0
5	411	1.36182	GGCAGATGATACAGTGTTAGAAGA	1	6	0	0	1	1	1	0	1	0.5	0	0.5	0	0	0	0	0	0	0	0	0	0	0	0	0	0
6	411	1.36182	AGCAGACGATACAGTACTAGAGGA	1	2	0	0	0	0	0	0	1	0.5	0	0.5	0	0	0	0	0	0	0	0	0	0	0	0	0	0
7	411	1.36182	AGCCGATGATACAGTATTAGAAGA	3	7	0	0	1	1	1	1	1	0.5	0	0.5	0	0	0	0	0	0	0	0	0	0	0	0	0	0
8	411	1.36182	AGCAGATGATACAGTAGTAGAAGA	10	6	0	0	1	1	1	0	1	0.5	0	0.5	0	0	0	0	0	0	0	0	0	0	0	0	0	0
9	411	1.36182	AGCAGATGATACAGTGTTAGAAGA	23	6	0	0	1	1	1	0	1	0.5	0	0.5	0	0	0	0	0	0	0	0	0	0	0	0	0	0
10	411	1.36182	AGCAGATGATACAGTATTAGAGGA	12	3	0	0	0	0	0	0	1	0.5	0	0.5	0	0	0	0	0	0	0	0	0	0	0	0	0	0
11	411	1.36182	AGCGGATGATACAGTATTAGAAGA	5	7	0	0	1	1	1	1	1	0.5	0	0.5	0	0	0	0	0	0	0	0	0	0	0	0	0	0
12	411	1.36182	AGCAGATGATACAGCATTAGAAGA	1	6	0	0	1	1	1	0	1	0.5	0	0.5	0	0	0	0	0	0	0	0	0	0	0	0	0	0
13	411	1.36182	AGCAGATGATACCGTATTAGAAGA	3	6.5	0	0	1	1	1	1	1	0.5	0	0	0	0	0	0	0	0	0	0	0	0	0	0	0	0
14	411	1.36182	AGCAGATGATACAGTCTTAGAAGA	6	6	0	0	1	1	1	0	1	0.5	0	0.5	0	0	0	0	0	0	0	0	0	0	0	0	0	0
15	411	1.36182	AGCAGATGATACAGTACTAGAAGA	13	6	0	0	1	1	1	0	1	0.5	0	0.5	0	0	0	0	0	0	0	0	0	0	0	0	0	0
16	411	1.36182	GGCAGACGATACAGTATTAGAAGA	1	7	0	0	1	1	1	1	1	0.5	0	0.5	0	0	0	0	0	0	0	0	0	0	0	0	0	0
17	411	1.36182	AGCAGATGATACAGTATTGGAGGA	1	3	0	0	0	0	0	0	1	0.5	0	0.5	0	0	0	0	0	0	0	0	0	0	0	0	0	0
18	411	1.36182	AGCAGGTGATACAGTATTAGAAGA	2	7	0	0	1	1	1	1	1	0.5	0	0.5	0	0	0	0	0	0	0	0	0	0	0	0	0	0
19	411	1.36182	AGCAGATGATACTGTATTAGAAGA	2	7	0	0	1	1	1	1	1	0.5	0	0.5	0	0	0	0	0	0	0	0	0	0	0	0	0	0
20	411	1.36182	AGCAGATGATACAGTACTAGAGGA	2	3	0	0	0	0	0	0	1	0.5	0	0.5	0	0	0	0	0	0	0	0	0	0	0	0	0	0
21	411	1.36182	AGCAGATGACACAGTGTTAGAAGA	1	6	0	0	1	1	1	0	1	0.5	0	0.5	0	0	0	0	0	0	0	0	0	0	0	0	0	0
22	411	1.36182	AGCAGATGACACAGTATTAGAAGA	21	7	0	0	1	1	1	1	1	0.5	0	0.5	0	0	0	0	0	0	0	0	0	0	0	0	0	0
23	411	1.36182	AGCAGATGGTACAGTATTAGAAGA	1	7	0	0	1	1	1	1	1	0.5	0	0.5	0	0	0	0	0	0	0	0	0	0	0	0	0	0
24	411	1.36182	AGCAGATGATACAGTATTGGAAGA	11	6	0	0	1	1	1	0	1	0.5	0	0.5	0	0	0	0	0	0	0	0	0	0	0	0	0	0
25	411	1.36182	AGCAGATGATACAGTATTAGGAGA	3	4	0	0	1	1	1	0	0	0.5	0	0.5	0	0	0	0	0	0	0	-1	0	0	0	0	0	0
26	411	1.36182	GGCAGATGATACAGTATTGGAAGA	1	6	0	0	1	1	1	0	1	0.5	0	0.5	0	0	0	0	0	0	0	0	0	0	0	0	0	0
27	411	1.36182	GGCAGATGATACAGTATTAGAGGA	2	3	0	0	0	0	0	0	1	0.5	0	0.5	0	0	0	0	0	0	0	0	0	0	0	0	0	0
28	411	1.36182	GGCAGATAATACAGTATTAGAAGA	1	7	0	0	1	1	1	1	1	0.5	0	0.5	0	0	0	0	0	0	0	0	0	0	0	0	0	0
29	411	1.36182	AGCAGATGACACAGTACTAGAAGA	1	6	0	0	1	1	1	0	1	0.5	0	0.5	0	0	0	0	0	0	0	0	0	0	0	0	0	0
30	411	1.36182	AGCAGATGTTACAGTATTAGAAGA	1	7	0	0	1	1	1	1	1	0.5	0	0.5	0	0	0	0	0	0	0	0	0	0	0	0	0	0
31	411	1.36182	AGCAGACGATACGGTATTAGAAGA	1	6.5	0	0	1	1	1	1	1	0.5	0	0	0	0	0	0	0	0	0	0	0	0	0	0	0	0
32	411	1.36182	GGCAGATGATACAGTATTAGAAGA	16	7	0	0	1	1	1	1	1	0.5	0	0.5	0	0	0	0	0	0	0	0	0	0	0	0	0	0
33	411	1.36182	AGCAGATGATGCAGTATTAGAAGA	1	6	0	0	1	1	1	1	1	0.5	0	0.5	0	0	0	0	0	0	0	0	0	0	0	0	-1	0
34	411	1.36182	AGCAGATGATACAGTATTAGAAGA	588	7	0	0	1	1	1	1	1	0.5	0	0.5	0	0	0	0	0	0	0	0	0	0	0	0	0	0
35	411	1.36182	AGCAGACGATACAGTATTAGAAGA	7	7	0	0	1	1	1	1	1	0.5	0	0.5	0	0	0	0	0	0	0	0	0	0	0	0	0	0
W2 for Pol_DNA_No_recombinants
d No. V	e Win start	f Info_E.	g Sequence	h No. seqs	I Score	1	2	3	4	5	6	7	8	9	10	11	12	13	14	15	16	17	18	19	20	21	22	23	24
1	2969	1.44479	TGACAGCAGGACAAATGGCAGTGT	1	1	0	0	1	0	0	0	0	0	0	0.5	0.5	0	0	0	0	0	0	-1	0	0	0	0	0	0
2	2969	1.44479	AGACAGCAGTACAAATGGCAGTAT	540	2.5	0	0.5	1	0	0	0	0	0	0	0.5	0.5	0	0	0	0	0	0	-1	0	0	0	0	0	0		4747-4770
3	2969	1.44479	AGACAGCAGTACAGATGGCAGTGT	1	1	0	0	1	0	0	0	0	0	0	0.5	0.5	0	0	0	0	0	0	-1	0	0	0	0	0	0
4	2969	1.44479	AGACAGCAGTACAAATGGCTGTAT	1	2.5	0	0.5	1	0	0	0	0	0	0	0.5	0.5	0	0	0	0	0	0	-1	0	0	0	0	0	0
5	2969	1.44479	GGACAGCAGTACAAATGGCAGTAT	10	1.5	0	0.5	1	0	0	0	0	0	0	0.5	0.5	0	0	0	0	0	0	-1	0	0	0	0	0	0
6	2969	1.44479	AGACAGCATTACAAATGGCAGTAT	2	2.5	0	0.5	1	0	0	0	0	0	0	0.5	0.5	0	0	0	0	0	0	-1	0	0	0	0	0	0
7	2969	1.44479	AGAGAGCAGTACAAATGGCAGTAT	1	2.5	0	0.5	1	0	0	0	0	0	0	0.5	0.5	0	0	0	0	0	0	-1	0	0	0	0	0	0
8	2969	1.44479	AGACAGCAGTACAAATGGCGGTAT	5	0.5	0	0.5	0	0	0	0	0	0	0	0.5	0.5	0	0	0	0	0	0	-1	0	0	0	0	0	0
9	2969	1.44479	AGACAGCAGTACAGATGGCAGTAT	37	1.5	0	0.5	1	0	0	0	0	0	0	0.5	0.5	0	0	0	0	0	0	-1	0	0	0	0	0	0
10	2969	1.44479	AGGCAGCAGTACAAATGGCAGTAT	2	1.5	0	0.5	1	0	0	0	0	0	0	0.5	0.5	0	0	0	0	0	0	-1	0	0	0	0	0	0
11	2969	1.44479	AGACAGCAATACAAATGGCAGTAT	1	2.5	0	0.5	1	0	0	0	0	0	0	0.5	0.5	0	0	0	0	0	0	-1	0	0	0	0	0	0
12	2969	1.44479	AGACAGCAGTACAGATGGCAGTAC	1	1	0	0	1	0	0	0	0	0	0	0.5	0.5	0	0	0	0	0	0	-1	0	0	0	0	0	0
13	2969	1.44479	GGACAGCAGTACAGATGGCAGTAT	1	1.5	0	0.5	1	0	0	0	0	0	0	0.5	0.5	0	0	0	0	0	0	-1	0	0	0	0	0	0
14	2969	1.44479	AGACAGCAGTGCAAATGGCAGTAT	18	0.5	0	0.5	1	0	0	0	0	0	0	0.5	0.5	0	0	0	0	0	0	-1	0	0	0	0	-1	0
15	2969	1.44479	AGACAGCAGTACAAATGGCAGTAC	14	1	0	0	1	0	0	0	0	0	0	0.5	0.5	0	0	0	0	0	0	-1	0	0	0	0	0	0
16	2969	1.44479	AGACAGCTGTACAAATGGCAGTAT	1	2.5	0	0.5	1	0	0	0	0	0	0	0.5	0.5	0	0	0	0	0	0	-1	0	0	0	0	0	0
17	2969	1.44479	AGACAGCCGTACAAATGGCAGTAT	2	1.5	0	0.5	1	0	0	0	0	0	0	0.5	0.5	0	0	0	0	0	0	-1	0	0	0	0	0	0
18	2969	1.44479	AGACAGCAGTACAAATGGCAGTCT	2	1	0	0	1	0	0	0	0	0	0	0.5	0.5	0	0	0	0	0	0	-1	0	0	0	0	0	0
19	2969	1.44479	AGACAGCAGTACTAATGGCAGTAT	3	2.5	0	0.5	1	0	0	0	0	0	0	0.5	0.5	0	0	0	0	0	0	-1	0	0	0	0	0	0
20	2969	1.44479	AGACAGCAGTACAAATGGCAGTCC	1	1	0	0	1	0	0	0	0	0	0	0.5	0.5	0	0	0	0	0	0	-1	0	0	0	0	0	0
21	2969	1.44479	AGACAGCAGTCCAAATGGCAGTAT	3	1.5	0	0.5	1	0	0	0	0	0	0	0.5	0.5	0	0	0	0	0	0	-1	0	0	0	0	0	0
22	2969	1.44479	AGACAGCAGTACAAGTGGCAGTAT	1	0.5	0	0.5	0	0	0	0	0	0	0	0.5	0.5	0	0	0	0	0	0	-1	0	0	0	0	0	0
23	2969	1.44479	AGACAGCAGTGCAAATGGCAGTGT	1	0	0	0	1	0	0	0	0	0	0	0.5	0.5	0	0	0	0	0	0	-1	0	0	0	0	-1	0
24	2969	1.44479	AGACAGCAGTACAAATGGCAGTGT	23	1	0	0	1	0	0	0	0	0	0	0.5	0.5	0	0	0	0	0	0	-1	0	0	0	0	0	0
25	2969	1.44479	GGACAGCAGTACAAATGGCAGTAC	2	1	0	0	1	0	0	0	0	0	0	0.5	0.5	0	0	0	0	0	0	-1	0	0	0	0	0	0
26	2969	1.44479	AGACAGCGGTACAAATGGCAGTGT	1	1	0	0	1	0	0	0	0	0	0	0.5	0.5	0	0	0	0	0	0	-1	0	0	0	0	0	0
27	2969	1.44479	AGACAGTAGTACAAATGGCAGTAT	1	2.5	0	0.5	1	0	0	0	0	0	0	0.5	0.5	0	0	0	0	0	0	-1	0	0	0	0	0	0
28	2969	1.44479	AGACAGCGGTACAAATGGCAGTAT	5	1.5	0	0.5	1	0	0	0	0	0	0	0.5	0.5	0	0	0	0	0	0	-1	0	0	0	0	0	0
29	2969	1.44479	AGACAGCAGTACAAATGGCAGCAT	2	0.5	0	0.5	0	0	0	0	0	0	0	0.5	0.5	0	0	0	0	0	0	-1	0	0	0	0	0	0
30	2969	1.44479	AGACGGCAGTACAAATGGCAGTAT	2	2	0	0.5	1	0	0	0	0	0.5	0	0.5	0.5	0	0	0	0	0	0	-1	0	0	0	0	0	0
31	2969	1.44479	AGACAGCAGTACAAATGGCCGTAT	1	0.5	0	0.5	0	0	0	0	0	0	0	0.5	0.5	0	0	0	0	0	0	-1	0	0	0	0	0	0
32	2969	1.44479	AGACAGCAGTTCAAATGGCAGTAT	1	2.5	0	0.5	1	0	0	0	0	0	0	0.5	0.5	0	0	0	0	0	0	-1	0	0	0	0	0	0
33	2969	1.44479	CGACAGCAGTACAAATGGCAGTAT	1	1.5	0	0.5	1	0	0	0	0	0	0	0.5	0.5	0	0	0	0	0	0	-1	0	0	0	0	0	0
a MSA	GENOME_DNA_No_Recombinants
b Size	790
c In_Seqs	760
d No. V	e Win start	f Info_E.	g Sequence	h No. seqs	I Score	1	2	3	4	5	6	7	8	9	10	11	12	13	14	15	16	17	18	19	20	21	22	23	24
1	2928	1.34727	AGCAGATGATACGGTATTAGAAGA	1	6.5	0	0	1	1	1	1	1	0.5	0	0	0	0	0	0	0	0	0	0	0	0	0	0	0	0		2333-2356
2	2928	1.34727	AGCAGATGACACAGTATTAGAAGG	1	7	0	0	1	1	1	1	1	0.5	0	0.5	0	0	0	0	0	0	0	0	0	0	0	0	0	0
3	2928	1.34727	AGCAGATGACACAGTATTAGAGGA	2	3	0	0	0	0	0	0	1	0.5	0	0.5	0	0	0	0	0	0	0	0	0	0	0	0	0	0
4	2928	1.34727	GGCAGATGATACAGTGTTAGAAGA	1	6	0	0	1	1	1	0	1	0.5	0	0.5	0	0	0	0	0	0	0	0	0	0	0	0	0	0
5	2928	1.34727	AGCAGACGATACAGTACTAGAGGA	1	2	0	0	0	0	0	0	1	0.5	0	0.5	0	0	0	0	0	0	0	0	0	0	0	0	0	0
6	2928	1.34727	AGCCGATGATACAGTATTAGAAGA	3	7	0	0	1	1	1	1	1	0.5	0	0.5	0	0	0	0	0	0	0	0	0	0	0	0	0	0
7	2928	1.34727	AGCAGATGATACAGTAGTAGAAGA	11	6	0	0	1	1	1	0	1	0.5	0	0.5	0	0	0	0	0	0	0	0	0	0	0	0	0	0
8	2928	1.34727	AGCAGATGATACAGTGTTAGAAGA	25	6	0	0	1	1	1	0	1	0.5	0	0.5	0	0	0	0	0	0	0	0	0	0	0	0	0	0
9	2928	1.34727	AGCAGATGATACAGTATTAGAGGA	12	3	0	0	0	0	0	0	1	0.5	0	0.5	0	0	0	0	0	0	0	0	0	0	0	0	0	0
10	2928	1.34727	AGCGGATGATACAGTATTAGAAGA	5	7	0	0	1	1	1	1	1	0.5	0	0.5	0	0	0	0	0	0	0	0	0	0	0	0	0	0
11	2928	1.34727	AGCAGATGATACAGCATTAGAAGA	1	6	0	0	1	1	1	0	1	0.5	0	0.5	0	0	0	0	0	0	0	0	0	0	0	0	0	0
12	2928	1.34727	AGCAGATGATACCGTATTAGAAGA	2	6.5	0	0	1	1	1	1	1	0.5	0	0	0	0	0	0	0	0	0	0	0	0	0	0	0	0
13	2928	1.34727	AGCAGATGATACAGTCTTAGAAGA	6	6	0	0	1	1	1	0	1	0.5	0	0.5	0	0	0	0	0	0	0	0	0	0	0	0	0	0
14	2928	1.34727	AGCAGATGATACAGTACTAGAAGA	11	6	0	0	1	1	1	0	1	0.5	0	0.5	0	0	0	0	0	0	0	0	0	0	0	0	0	0
15	2928	1.34727	GGCAGACGATACAGTATTAGAAGA	1	7	0	0	1	1	1	1	1	0.5	0	0.5	0	0	0	0	0	0	0	0	0	0	0	0	0	0
16	2928	1.34727	AGCAGATGATACAGTATTGGAGGA	1	3	0	0	0	0	0	0	1	0.5	0	0.5	0	0	0	0	0	0	0	0	0	0	0	0	0	0
17	2928	1.34727	AGCAGGTGATACAGTATTAGAAGA	2	7	0	0	1	1	1	1	1	0.5	0	0.5	0	0	0	0	0	0	0	0	0	0	0	0	0	0
18	2928	1.34727	AGCAGATGATACTGTATTAGAAGA	2	7	0	0	1	1	1	1	1	0.5	0	0.5	0	0	0	0	0	0	0	0	0	0	0	0	0	0
19	2928	1.34727	AGCAGATGATACAGTACTAGAGGA	3	3	0	0	0	0	0	0	1	0.5	0	0.5	0	0	0	0	0	0	0	0	0	0	0	0	0	0
20	2928	1.34727	AGCAGATGACACAGTGTTAGAAGA	1	6	0	0	1	1	1	0	1	0.5	0	0.5	0	0	0	0	0	0	0	0	0	0	0	0	0	0
21	2928	1.34727	AGCAGATGACACAGTATTAGAAGA	21	7	0	0	1	1	1	1	1	0.5	0	0.5	0	0	0	0	0	0	0	0	0	0	0	0	0	0
22	2928	1.34727	AGCAGATGGTACAGTATTAGAAGA	1	7	0	0	1	1	1	1	1	0.5	0	0.5	0	0	0	0	0	0	0	0	0	0	0	0	0	0
23	2928	1.34727	AGCAGATGATACAGTATTGGAAGA	11	6	0	0	1	1	1	0	1	0.5	0	0.5	0	0	0	0	0	0	0	0	0	0	0	0	0	0
24	2928	1.34727	AGCAGATGATACAGTATTAGGAGA	4	4	0	0	1	1	1	0	0	0.5	0	0.5	0	0	0	0	0	0	0	-1	0	0	0	0	0	0
25	2928	1.34727	GGCAGATGATACAGTATTGGAAGA	1	6	0	0	1	1	1	0	1	0.5	0	0.5	0	0	0	0	0	0	0	0	0	0	0	0	0	0
26	2928	1.34727	GGCAGATGATACAGTATTAGAGGA	2	3	0	0	0	0	0	0	1	0.5	0	0.5	0	0	0	0	0	0	0	0	0	0	0	0	0	0
27	2928	1.34727	GGCAGATAATACAGTATTAGAAGA	1	7	0	0	1	1	1	1	1	0.5	0	0.5	0	0	0	0	0	0	0	0	0	0	0	0	0	0
28	2928	1.34727	AGCAGATGACACAGTACTAGAAGA	1	6	0	0	1	1	1	0	1	0.5	0	0.5	0	0	0	0	0	0	0	0	0	0	0	0	0	0
29	2928	1.34727	AGCAGATGTTACAGTATTAGAAGA	1	7	0	0	1	1	1	1	1	0.5	0	0.5	0	0	0	0	0	0	0	0	0	0	0	0	0	0
30	2928	1.34727	GGCTGATGATACAGTATTAGAAGA	1	7	0	0	1	1	1	1	1	0.5	0	0.5	0	0	0	0	0	0	0	0	0	0	0	0	0	0
31	2928	1.34727	AGCAGACGATACGGTATTAGAAGA	1	6.5	0	0	1	1	1	1	1	0.5	0	0	0	0	0	0	0	0	0	0	0	0	0	0	0	0
32	2928	1.34727	GGCAGATGATACAGTATTAGAAGA	17	7	0	0	1	1	1	1	1	0.5	0	0.5	0	0	0	0	0	0	0	0	0	0	0	0	0	0
33	2928	1.34727	AGCAGATGATACAGTATGAGAAGA	1	6	0	0	1	1	1	0	1	0.5	0	0.5	0	0	0	0	0	0	0	0	0	0	0	0	0	0
34	2928	1.34727	AGCAGATGATACAGTATTAGAAGA	599	7	0	0	1	1	1	1	1	0.5	0	0.5	0	0	0	0	0	0	0	0	0	0	0	0	0	0
35	2928	1.34727	AGCAGACGATACAGTATTAGAAGA	6	7	0	0	1	1	1	1	1	0.5	0	0.5	0	0	0	0	0	0	0	0	0	0	0	0	0	0
W2 for GENOME_DNA_No_Recombinants
d No. V	e Win start	f Info_E.	g Sequence	h No. seqs	I Score	1	2	3	4	5	6	7	8	9	10	11	12	13	14	15	16	17	18	19	20	21	22	23	24
1	5444	1.44523	TGACAGCAGGACAAATGGCAGTGT	1	1	0	0	1	0	0	0	0	0	0	0.5	0.5	0	0	0	0	0	0	-1	0	0	0	0	0	0
2	5444	1.44523	AGACAGCAGTACAAATGGCAGTAT	549	2.5	0	0.5	1	0	0	0	0	0	0	0.5	0.5	0	0	0	0	0	0	-1	0	0	0	0	0	0		4747-4770
3	5444	1.44523	AGACAGCAGTACAGATGGCAGTGT	1	1	0	0	1	0	0	0	0	0	0	0.5	0.5	0	0	0	0	0	0	-1	0	0	0	0	0	0
4	5444	1.44523	AGACAGCAGTACAAATGGCTGTAT	1	2.5	0	0.5	1	0	0	0	0	0	0	0.5	0.5	0	0	0	0	0	0	-1	0	0	0	0	0	0
5	5444	1.44523	GGACAGCAGTACAAATGGCAGTAT	10	1.5	0	0.5	1	0	0	0	0	0	0	0.5	0.5	0	0	0	0	0	0	-1	0	0	0	0	0	0
6	5444	1.44523	AGACAGCATTACAAATGGCAGTAT	2	2.5	0	0.5	1	0	0	0	0	0	0	0.5	0.5	0	0	0	0	0	0	-1	0	0	0	0	0	0
7	5444	1.44523	AGAGAGCAGTACAAATGGCAGTAT	1	2.5	0	0.5	1	0	0	0	0	0	0	0.5	0.5	0	0	0	0	0	0	-1	0	0	0	0	0	0
8	5444	1.44523	AGACAGCAGTACAAATGGCGGTAT	5	0.5	0	0.5	0	0	0	0	0	0	0	0.5	0.5	0	0	0	0	0	0	-1	0	0	0	0	0	0
9	5444	1.44523	AGACAGCAGTACAGATGGCAGTAT	37	1.5	0	0.5	1	0	0	0	0	0	0	0.5	0.5	0	0	0	0	0	0	-1	0	0	0	0	0	0
10	5444	1.44523	AGGCAGCAGTACAAATGGCAGTAT	2	1.5	0	0.5	1	0	0	0	0	0	0	0.5	0.5	0	0	0	0	0	0	-1	0	0	0	0	0	0
11	5444	1.44523	AGACAGCAATACAAATGGCAGTAT	1	2.5	0	0.5	1	0	0	0	0	0	0	0.5	0.5	0	0	0	0	0	0	-1	0	0	0	0	0	0
12	5444	1.44523	AGACAGCAGTACAGATGGCAGTAC	1	1	0	0	1	0	0	0	0	0	0	0.5	0.5	0	0	0	0	0	0	-1	0	0	0	0	0	0
13	5444	1.44523	GGACAGCAGTACAGATGGCAGTAT	1	1.5	0	0.5	1	0	0	0	0	0	0	0.5	0.5	0	0	0	0	0	0	-1	0	0	0	0	0	0
14	5444	1.44523	AGACAGCAGTGCAAATGGCAGTAT	21	0.5	0	0.5	1	0	0	0	0	0	0	0.5	0.5	0	0	0	0	0	0	-1	0	0	0	0	-1	0
15	5444	1.44523	AGACAGCAGTACAAATGGCAGTAC	14	1	0	0	1	0	0	0	0	0	0	0.5	0.5	0	0	0	0	0	0	-1	0	0	0	0	0	0
16	5444	1.44523	AGACAGCTGTACAAATGGCAGTAT	2	2.5	0	0.5	1	0	0	0	0	0	0	0.5	0.5	0	0	0	0	0	0	-1	0	0	0	0	0	0
17	5444	1.44523	AGACAGCCGTACAAATGGCAGTAT	2	1.5	0	0.5	1	0	0	0	0	0	0	0.5	0.5	0	0	0	0	0	0	-1	0	0	0	0	0	0
18	5444	1.44523	AGACAGCAGTACAAATGGCAGTCT	2	1	0	0	1	0	0	0	0	0	0	0.5	0.5	0	0	0	0	0	0	-1	0	0	0	0	0	0
19	5444	1.44523	AGACAGCAGTACTAATGGCAGTAT	3	2.5	0	0.5	1	0	0	0	0	0	0	0.5	0.5	0	0	0	0	0	0	-1	0	0	0	0	0	0
20	5444	1.44523	AGACAGCAGTACAAATGGCAGTCC	1	1	0	0	1	0	0	0	0	0	0	0.5	0.5	0	0	0	0	0	0	-1	0	0	0	0	0	0
21	5444	1.44523	AGACAGCAGTCCAAATGGCAGTAT	3	1.5	0	0.5	1	0	0	0	0	0	0	0.5	0.5	0	0	0	0	0	0	-1	0	0	0	0	0	0
22	5444	1.44523	AGACAGCAGTACAAGTGGCAGTAT	1	0.5	0	0.5	0	0	0	0	0	0	0	0.5	0.5	0	0	0	0	0	0	-1	0	0	0	0	0	0
23	5444	1.44523	AGACAGCAGTGCAAATGGCAGTGT	1	0	0	0	1	0	0	0	0	0	0	0.5	0.5	0	0	0	0	0	0	-1	0	0	0	0	-1	0
24	5444	1.44523	AGACAGCAGTACAAATGGCAGTGT	22	1	0	0	1	0	0	0	0	0	0	0.5	0.5	0	0	0	0	0	0	-1	0	0	0	0	0	0
25	5444	1.44523	GGACAGCAGTACAAATGGCAGTAC	2	1	0	0	1	0	0	0	0	0	0	0.5	0.5	0	0	0	0	0	0	-1	0	0	0	0	0	0
26	5444	1.44523	AGACAGCGGTACAAATGGCAGTGT	1	1	0	0	1	0	0	0	0	0	0	0.5	0.5	0	0	0	0	0	0	-1	0	0	0	0	0	0
27	5444	1.44523	AGACAGTAGTACAAATGGCAGTAT	1	2.5	0	0.5	1	0	0	0	0	0	0	0.5	0.5	0	0	0	0	0	0	-1	0	0	0	0	0	0
28	5444	1.44523	AGACAGCGGTACAAATGGCAGTAT	4	1.5	0	0.5	1	0	0	0	0	0	0	0.5	0.5	0	0	0	0	0	0	-1	0	0	0	0	0	0
29	5444	1.44523	AGACAGCAGTACAAATGGCAGCAT	2	0.5	0	0.5	0	0	0	0	0	0	0	0.5	0.5	0	0	0	0	0	0	-1	0	0	0	0	0	0
30	5444	1.44523	AGACGGCAGTACAAATGGCAGTAT	2	2	0	0.5	1	0	0	0	0	0.5	0	0.5	0.5	0	0	0	0	0	0	-1	0	0	0	0	0	0
31	5444	1.44523	AGACAGCAGTACAAATGGCCGTAT	1	0.5	0	0.5	0	0	0	0	0	0	0	0.5	0.5	0	0	0	0	0	0	-1	0	0	0	0	0	0
32	5444	1.44523	AGACAGCAGTTCAAATGGCAGTAT	1	2.5	0	0.5	1	0	0	0	0	0	0	0.5	0.5	0	0	0	0	0	0	-1	0	0	0	0	0	0
33	5444	1.44523	CGACAGCAGTACAAATGGCAGTAT	1	1.5	0	0.5	1	0	0	0	0	0	0	0.5	0.5	0	0	0	0	0	0	-1	0	0	0	0	0	0
a MSA	POL_DNA_GroupM_plus_Recombinants
b Size	1206
c In_Seqs	1143
d No. V	e Win start	f Info_E.	g Sequence	h No. seqs	I Score	1	2	3	4	5	6	7	8	9	10	11	12	13	14	15	16	17	18	19	20	21	22	23	24
1	411	1.41579	AGCAGATGACACAGTATTAGAAGG	1	7	0	0	1	1	1	1	1	0.5	0	0.5	0	0	0	0	0	0	0	0	0	0	0	0	0	0
2	411	1.41579	AGCAGATGACACAGTATTAGAGGA	3	3	0	0	0	0	0	0	1	0.5	0	0.5	0	0	0	0	0	0	0	0	0	0	0	0	0	0		2333-2356
3	411	1.41579	AGCAGACGATACAGTACTAGAGGA	1	2	0	0	0	0	0	0	1	0.5	0	0.5	0	0	0	0	0	0	0	0	0	0	0	0	0	0
4	411	1.41579	CGCAGATGATACAGTATTAGAAGA	1	7	0	0	1	1	1	1	1	0.5	0	0.5	0	0	0	0	0	0	0	0	0	0	0	0	0	0
5	411	1.41579	AGCAGATGATACAGTATTAGAGGA	15	3	0	0	0	0	0	0	1	0.5	0	0.5	0	0	0	0	0	0	0	0	0	0	0	0	0	0
6	411	1.41579	AGCGGATGATACAGTATTAGAAGA	6	7	0	0	1	1	1	1	1	0.5	0	0.5	0	0	0	0	0	0	0	0	0	0	0	0	0	0
7	411	1.41579	AGCAGATGATACCGTATTAGAAGA	3	6.5	0	0	1	1	1	1	1	0.5	0	0	0	0	0	0	0	0	0	0	0	0	0	0	0	0
8	411	1.41579	AGCAGATGATACAGTCTTAGAAGA	9	6	0	0	1	1	1	0	1	0.5	0	0.5	0	0	0	0	0	0	0	0	0	0	0	0	0	0
9	411	1.41579	AGCAGATGATACAGTACTAGAAGA	17	6	0	0	1	1	1	0	1	0.5	0	0.5	0	0	0	0	0	0	0	0	0	0	0	0	0	0
10	411	1.41579	AGCAGATGATACAGTATTAGCAGA	3	4	0	0	1	1	1	0	0	0.5	0	0.5	0	0	0	0	0	0	0	-1	0	0	0	0	0	0
11	411	1.41579	AGCAGATGATACAGTATTGGAGGA	1	3	0	0	0	0	0	0	1	0.5	0	0.5	0	0	0	0	0	0	0	0	0	0	0	0	0	0
12	411	1.41579	AGCAGGTGATACAGTATTAGAAGA	2	7	0	0	1	1	1	1	1	0.5	0	0.5	0	0	0	0	0	0	0	0	0	0	0	0	0	0
13	411	1.41579	AGCAGATGACACAGTGTTAGAAGA	1	6	0	0	1	1	1	0	1	0.5	0	0.5	0	0	0	0	0	0	0	0	0	0	0	0	0	0
14	411	1.41579	AGCAGATGATACAGTATTAGAAGG	2	7	0	0	1	1	1	1	1	0.5	0	0.5	0	0	0	0	0	0	0	0	0	0	0	0	0	0
15	411	1.41579	AGCAGATGATACAGTACTAGCAGA	1	3	0	0	1	1	0	0	0	0.5	0	0.5	0	0	0	0	0	0	0	-1	0	0	0	0	0	0
16	411	1.41579	AGCAGATGACACAGTATTAGAAGA	31	7	0	0	1	1	1	1	1	0.5	0	0.5	0	0	0	0	0	0	0	0	0	0	0	0	0	0
17	411	1.41579	AGCAGATAATACAGTATTCGAAGA	1	6	0	0	1	1	1	0	1	0.5	0	0.5	0	0	0	0	0	0	0	0	0	0	0	0	0	0
18	411	1.41579	AGCAGATGGTACAGTATTAGAAGA	1	7	0	0	1	1	1	1	1	0.5	0	0.5	0	0	0	0	0	0	0	0	0	0	0	0	0	0
19	411	1.41579	GGCAGATGATACAGTATTGGAAGA	1	6	0	0	1	1	1	0	1	0.5	0	0.5	0	0	0	0	0	0	0	0	0	0	0	0	0	0
20	411	1.41579	GGCAGATGATACAGTATTAGAGGA	2	3	0	0	0	0	0	0	1	0.5	0	0.5	0	0	0	0	0	0	0	0	0	0	0	0	0	0
21	411	1.41579	GGCAGATAATACAGTATTAGAAGA	1	7	0	0	1	1	1	1	1	0.5	0	0.5	0	0	0	0	0	0	0	0	0	0	0	0	0	0
22	411	1.41579	AGCAGACGATACGGTATTAGAAGA	1	6.5	0	0	1	1	1	1	1	0.5	0	0	0	0	0	0	0	0	0	0	0	0	0	0	0	0
23	411	1.41579	GGCAGATGATACAGTATTAGAAGA	26	7	0	0	1	1	1	1	1	0.5	0	0.5	0	0	0	0	0	0	0	0	0	0	0	0	0	0
24	411	1.41579	AGCAGATGATGCAGTATTAGAAGA	1	6	0	0	1	1	1	1	1	0.5	0	0.5	0	0	0	0	0	0	0	0	0	0	0	0	-1	0
25	411	1.41579	GGCAGATGACACAGTATTAGAAGA	1	7	0	0	1	1	1	1	1	0.5	0	0.5	0	0	0	0	0	0	0	0	0	0	0	0	0	0
26	411	1.41579	AGCAGATGATACGGTATTAGAAGA	3	6.5	0	0	1	1	1	1	1	0.5	0	0	0	0	0	0	0	0	0	0	0	0	0	0	0	0
27	411	1.41579	AGCTGATGATACAGTATTAGAAGA	4	7	0	0	1	1	1	1	1	0.5	0	0.5	0	0	0	0	0	0	0	0	0	0	0	0	0	0
28	411	1.41579	GGCAGATGATACAGTGTTAGAAGA	1	6	0	0	1	1	1	0	1	0.5	0	0.5	0	0	0	0	0	0	0	0	0	0	0	0	0	0
29	411	1.41579	AGCCGATGATACAGTATTAGAAGA	3	7	0	0	1	1	1	1	1	0.5	0	0.5	0	0	0	0	0	0	0	0	0	0	0	0	0	0
30	411	1.41579	AGCAGATGATACAGTAGTAGAAGA	14	6	0	0	1	1	1	0	1	0.5	0	0.5	0	0	0	0	0	0	0	0	0	0	0	0	0	0
31	411	1.41579	AGCAGATGATACAGTGTTAGAAGA	30	6	0	0	1	1	1	0	1	0.5	0	0.5	0	0	0	0	0	0	0	0	0	0	0	0	0	0
32	411	1.41579	AGCAGATGATACAGCATTAGAAGA	1	6	0	0	1	1	1	0	1	0.5	0	0.5	0	0	0	0	0	0	0	0	0	0	0	0	0	0
33	411	1.41579	AGCTGATGATACAGTAGTAGAAGA	1	6	0	0	1	1	1	0	1	0.5	0	0.5	0	0	0	0	0	0	0	0	0	0	0	0	0	0
34	411	1.41579	GGCAGACGATACAGTATTAGAAGA	1	7	0	0	1	1	1	1	1	0.5	0	0.5	0	0	0	0	0	0	0	0	0	0	0	0	0	0
35	411	1.41579	AGCAGATGATACTGTATTAGAAGA	3	7	0	0	1	1	1	1	1	0.5	0	0.5	0	0	0	0	0	0	0	0	0	0	0	0	0	0
36	411	1.41579	AGCAGATGATACAGTAATAGAAGA	1	7	0	0	1	1	1	1	1	0.5	0	0.5	0	0	0	0	0	0	0	0	0	0	0	0	0	0
37	411	1.41579	AGCAGATGATACAGTACTAGAGGA	3	3	0	0	0	0	0	0	1	0.5	0	0.5	0	0	0	0	0	0	0	0	0	0	0	0	0	0
38	411	1.41579	AGCAGATGATCCAGTATTAGAAGA	1	7	0	0	1	1	1	1	1	0.5	0	0.5	0	0	0	0	0	0	0	0	0	0	0	0	0	0
39	411	1.41579	AGCAGATGATACAGTGTTAGAGGA	2	3	0	0	0	0	0	0	1	0.5	0	0.5	0	0	0	0	0	0	0	0	0	0	0	0	0	0
40	411	1.41579	AGCAGATGATACAGTATTAGGAAG	1	4	0	0	1	1	1	0	0	0.5	0	0.5	0	0	0	0	0	0	0	-1	0	0	0	0	0	0
41	411	1.41579	AGCAGATGATACAGTATTGGAAGA	15	6	0	0	1	1	1	0	1	0.5	0	0.5	0	0	0	0	0	0	0	0	0	0	0	0	0	0
42	411	1.41579	AGCAGATGATACAGTATTAGGAGA	3	4	0	0	1	1	1	0	0	0.5	0	0.5	0	0	0	0	0	0	0	-1	0	0	0	0	0	0
43	411	1.41579	AGCAGATGACACAGTACTAGAAGA	2	6	0	0	1	1	1	0	1	0.5	0	0.5	0	0	0	0	0	0	0	0	0	0	0	0	0	0
44	411	1.41579	AGCAGATGTTACAGTATTAGAAGA	1	7	0	0	1	1	1	1	1	0.5	0	0.5	0	0	0	0	0	0	0	0	0	0	0	0	0	0
45	411	1.41579	AGCAGATGATACAGTATTAGAAGA	913	7	0	0	1	1	1	1	1	0.5	0	0.5	0	0	0	0	0	0	0	0	0	0	0	0	0	0
46	411	1.41579	AGCAGACGATACAGTATTAGAAGA	8	7	0	0	1	1	1	1	1	0.5	0	0.5	0	0	0	0	0	0	0	0	0	0	0	0	0	0
W2 for POL_DNA_GroupM_plus_Recombinants
d No. V	e Win start	f Info_E.	g Sequence	h No. seqs	I Score	1	2	3	4	5	6	7	8	9	10	11	12	13	14	15	16	17	18	19	20	21	22	23	24
1	2969	1.57957	AGACAGCAGTACAGATGGCGGTAT	1	0.5	0	0.5	0	0	0	0	0	0	0	0.5	0.5	0	0	0	0	0	0	-1	0	0	0	0	0	0		4747-4770
2	2969	1.57957	AGACAGCAGTGCAGATGGCAGTAT	2	0.5	0	0.5	1	0	0	0	0	0	0	0.5	0.5	0	0	0	0	0	0	-1	0	0	0	0	-1	0
3	2969	1.57957	AGACAGCAGTACTGATGGCAGTAT	1	1.5	0	0.5	1	0	0	0	0	0	0	0.5	0.5	0	0	0	0	0	0	-1	0	0	0	0	0	0
4	2969	1.57957	AGACAGCAGTACAGATGGCAGTAT	119	1.5	0	0.5	1	0	0	0	0	0	0	0.5	0.5	0	0	0	0	0	0	-1	0	0	0	0	0	0
5	2969	1.57957	AGACAGCAGTACAGATGGCAGTAC	2	1	0	0	1	0	0	0	0	0	0	0.5	0.5	0	0	0	0	0	0	-1	0	0	0	0	0	0
6	2969	1.57957	GGACAGCAGTACAGATGGCAGTAT	2	1.5	0	0.5	1	0	0	0	0	0	0	0.5	0.5	0	0	0	0	0	0	-1	0	0	0	0	0	0
7	2969	1.57957	AGACAGCAGTACAAATGGCAGTAC	17	1	0	0	1	0	0	0	0	0	0	0.5	0.5	0	0	0	0	0	0	-1	0	0	0	0	0	0
8	2969	1.57957	AGACAGCTGTACAAATGGCAGTAT	2	2.5	0	0.5	1	0	0	0	0	0	0	0.5	0.5	0	0	0	0	0	0	-1	0	0	0	0	0	0
9	2969	1.57957	AGACAGCCGTACAAATGGCAGTAT	2	1.5	0	0.5	1	0	0	0	0	0	0	0.5	0.5	0	0	0	0	0	0	-1	0	0	0	0	0	0
10	2969	1.57957	AGACAGCAGTACTAATGGCAGTAT	4	2.5	0	0.5	1	0	0	0	0	0	0	0.5	0.5	0	0	0	0	0	0	-1	0	0	0	0	0	0
11	2969	1.57957	AGACAGCAGTACAAATGGCAGTCC	1	1	0	0	1	0	0	0	0	0	0	0.5	0.5	0	0	0	0	0	0	-1	0	0	0	0	0	0
12	2969	1.57957	AGACAGCAGTCCAAATGGCAGTAT	4	1.5	0	0.5	1	0	0	0	0	0	0	0.5	0.5	0	0	0	0	0	0	-1	0	0	0	0	0	0
13	2969	1.57957	AGACAGCAGTACAAGTGGCAGTAT	2	0.5	0	0.5	0	0	0	0	0	0	0	0.5	0.5	0	0	0	0	0	0	-1	0	0	0	0	0	0
14	2969	1.57957	AGACAGCAGTACAAATGGCAGTGT	27	1	0	0	1	0	0	0	0	0	0	0.5	0.5	0	0	0	0	0	0	-1	0	0	0	0	0	0
15	2969	1.57957	AGACAGCGGTACAAATGGCAGTGT	1	1	0	0	1	0	0	0	0	0	0	0.5	0.5	0	0	0	0	0	0	-1	0	0	0	0	0	0
16	2969	1.57957	AGACAGTAGTACAAATGGCAGTAT	1	2.5	0	0.5	1	0	0	0	0	0	0	0.5	0.5	0	0	0	0	0	0	-1	0	0	0	0	0	0
17	2969	1.57957	AGACAGCAGTACAAATGGCAGCAT	2	0.5	0	0.5	0	0	0	0	0	0	0	0.5	0.5	0	0	0	0	0	0	-1	0	0	0	0	0	0
18	2969	1.57957	AGACAGCAGTACCAATGGCAGTAT	1	1	0	0.5	1	0	0	0	0	0	0	0	0.5	0	0	0	0	0	0	-1	0	0	0	0	0	0
19	2969	1.57957	AGACAGCAGTACAAATGGCCGTAT	1	0.5	0	0.5	0	0	0	0	0	0	0	0.5	0.5	0	0	0	0	0	0	-1	0	0	0	0	0	0
20	2969	1.57957	CGACAGCAGTACAAATGGCAGTAT	1	1.5	0	0.5	1	0	0	0	0	0	0	0.5	0.5	0	0	0	0	0	0	-1	0	0	0	0	0	0
21	2969	1.57957	TGACAGCAGGACAAATGGCAGTGT	1	1	0	0	1	0	0	0	0	0	0	0.5	0.5	0	0	0	0	0	0	-1	0	0	0	0	0	0
22	2969	1.57957	AGACAGCAGTACAAATGGCAGTAT	793	2.5	0	0.5	1	0	0	0	0	0	0	0.5	0.5	0	0	0	0	0	0	-1	0	0	0	0	0	0
23	2969	1.57957	AGACAGCAGTACAAACGGCAGTAT	1	0	0	0.5	0	0	0	0	0	0	0	0.5	0	0	0	0	0	0	0	-1	0	0	0	0	0	0
24	2969	1.57957	AGACAGCAGTACAGATGGCAGTGT	3	1	0	0	1	0	0	0	0	0	0	0.5	0.5	0	0	0	0	0	0	-1	0	0	0	0	0	0
25	2969	1.57957	AGACAGCAGTACAAATGGCTGTAT	1	2.5	0	0.5	1	0	0	0	0	0	0	0.5	0.5	0	0	0	0	0	0	-1	0	0	0	0	0	0
26	2969	1.57957	AGACAGCAGTCCAGATGGCAGTAT	1	1.5	0	0.5	1	0	0	0	0	0	0	0.5	0.5	0	0	0	0	0	0	-1	0	0	0	0	0	0
27	2969	1.57957	GGACAGCAGTACAAATGGCAGTAT	15	1.5	0	0.5	1	0	0	0	0	0	0	0.5	0.5	0	0	0	0	0	0	-1	0	0	0	0	0	0
28	2969	1.57957	AGACAGCATTACAAATGGCAGTAT	2	2.5	0	0.5	1	0	0	0	0	0	0	0.5	0.5	0	0	0	0	0	0	-1	0	0	0	0	0	0
29	2969	1.57957	AGAGAGCAGTACAAATGGCAGTAT	1	2.5	0	0.5	1	0	0	0	0	0	0	0.5	0.5	0	0	0	0	0	0	-1	0	0	0	0	0	0
30	2969	1.57957	AGACAGCAGTACAAATGGCGGTAT	6	0.5	0	0.5	0	0	0	0	0	0	0	0.5	0.5	0	0	0	0	0	0	-1	0	0	0	0	0	0
31	2969	1.57957	AGGCAGCAGTACAAATGGCAGTAT	2	1.5	0	0.5	1	0	0	0	0	0	0	0.5	0.5	0	0	0	0	0	0	-1	0	0	0	0	0	0
32	2969	1.57957	AGACAGCAATACAAATGGCAGTAT	1	2.5	0	0.5	1	0	0	0	0	0	0	0.5	0.5	0	0	0	0	0	0	-1	0	0	0	0	0	0
33	2969	1.57957	AGACAGCAGTTCAGATGGCAGTAT	1	1.5	0	0.5	1	0	0	0	0	0	0	0.5	0.5	0	0	0	0	0	0	-1	0	0	0	0	0	0
34	2969	1.57957	AGACAGCAGTACACATGGCAGTAT	1	1.5	0	0.5	1	0	0	0	0	0	0	0.5	0.5	0	0	0	0	0	0	-1	0	0	0	0	0	0
35	2969	1.57957	AGACAGCAGTGCAAATGGCAGTAT	25	0.5	0	0.5	1	0	0	0	0	0	0	0.5	0.5	0	0	0	0	0	0	-1	0	0	0	0	-1	0
36	2969	1.57957	AGACAGCGGTACAGATGGCAGTAT	1	1.5	0	0.5	1	0	0	0	0	0	0	0.5	0.5	0	0	0	0	0	0	-1	0	0	0	0	0	0
37	2969	1.57957	AGACAGCAGTACAAATGGCAGTCT	2	1	0	0	1	0	0	0	0	0	0	0.5	0.5	0	0	0	0	0	0	-1	0	0	0	0	0	0
38	2969	1.57957	AGACGGCAGTACAGATGGCAGTAT	1	2	0	0.5	1	0	0	0	0	0.5	0	0.5	0.5	0	0	0	0	0	0	-1	0	0	0	0	0	0
39	2969	1.57957	AGACAGCAGTGCAAATGGCAGTGT	1	0	0	0	1	0	0	0	0	0	0	0.5	0.5	0	0	0	0	0	0	-1	0	0	0	0	-1	0
40	2969	1.57957	AGACAGCAGTACAACTGGCAGTAT	1	0.5	0	0.5	0	0	0	0	0	0	0	0.5	0.5	0	0	0	0	0	0	-1	0	0	0	0	0	0
41	2969	1.57957	GGACAGCAGTACAAATGGCAGTAC	2	1	0	0	1	0	0	0	0	0	0	0.5	0.5	0	0	0	0	0	0	-1	0	0	0	0	0	0
42	2969	1.57957	AGACAGCGGTACAAATGGCAGTAT	8	1.5	0	0.5	1	0	0	0	0	0	0	0.5	0.5	0	0	0	0	0	0	-1	0	0	0	0	0	0
43	2969	1.57957	AGACGGCAGTACAAATGGCAGTAT	4	2	0	0.5	1	0	0	0	0	0.5	0	0.5	0.5	0	0	0	0	0	0	-1	0	0	0	0	0	0
44	2969	1.57957	AGACAGCAGTTCAAATGGCAGTAT	1	2.5	0	0.5	1	0	0	0	0	0	0	0.5	0.5	0	0	0	0	0	0	-1	0	0	0	0	0	0
45	2969	1.57957	AGACAGCACTACAAATGGCAGTAT	1	2.5	0	0.5	1	0	0	0	0	0	0	0.5	0.5	0	0	0	0	0	0	-1	0	0	0	0	0	0
a MSA	GENOME_DNA_GroupM_plus_Recombinants
b Size	1214
c In_Seqs	1153
d No. V	e Win start	f Info_E.	g Sequence	h No. seqs	I Score	1	2	3	4	5	6	7	8	9	10	11	12	13	14	15	16	17	18	19	20	21	22	23	24
1	2928	1.4144	AGCAGATGACACAGTATTAGAAGG	1	7	0	0	1	1	1	1	1	0.5	0	0.5	0	0	0	0	0	0	0	0	0	0	0	0	0	0		2333-2356
2	2928	1.4144	AGCAGATGACACAGTATTAGAGGA	3	3	0	0	0	0	0	0	1	0.5	0	0.5	0	0	0	0	0	0	0	0	0	0	0	0	0	0
3	2928	1.4144	AGCAGACGATACAGTACTAGAGGA	1	2	0	0	0	0	0	0	1	0.5	0	0.5	0	0	0	0	0	0	0	0	0	0	0	0	0	0
4	2928	1.4144	CGCAGATGATACAGTATTAGAAGA	1	7	0	0	1	1	1	1	1	0.5	0	0.5	0	0	0	0	0	0	0	0	0	0	0	0	0	0
5	2928	1.4144	AGCAGATGATACAGTATTAGAGGA	14	3	0	0	0	0	0	0	1	0.5	0	0.5	0	0	0	0	0	0	0	0	0	0	0	0	0	0
6	2928	1.4144	AGCGGATGATACAGTATTAGAAGA	7	7	0	0	1	1	1	1	1	0.5	0	0.5	0	0	0	0	0	0	0	0	0	0	0	0	0	0
7	2928	1.4144	AGCAGATGATACCGTATTAGAAGA	3	6.5	0	0	1	1	1	1	1	0.5	0	0	0	0	0	0	0	0	0	0	0	0	0	0	0	0
8	2928	1.4144	AGCAGATGATACAGTCTTAGAAGA	9	6	0	0	1	1	1	0	1	0.5	0	0.5	0	0	0	0	0	0	0	0	0	0	0	0	0	0
9	2928	1.4144	AGCAGATGATACAGTACTAGAAGA	17	6	0	0	1	1	1	0	1	0.5	0	0.5	0	0	0	0	0	0	0	0	0	0	0	0	0	0
10	2928	1.4144	AGCAGATGATACAGTATTAGCAGA	3	4	0	0	1	1	1	0	0	0.5	0	0.5	0	0	0	0	0	0	0	-1	0	0	0	0	0	0
11	2928	1.4144	AGCAGATGATACAGTATTGGAGGA	1	3	0	0	0	0	0	0	1	0.5	0	0.5	0	0	0	0	0	0	0	0	0	0	0	0	0	0
12	2928	1.4144	AGCAGGTGATACAGTATTAGAAGA	2	7	0	0	1	1	1	1	1	0.5	0	0.5	0	0	0	0	0	0	0	0	0	0	0	0	0	0
13	2928	1.4144	AGCAGATGACACAGTGTTAGAAGA	1	6	0	0	1	1	1	0	1	0.5	0	0.5	0	0	0	0	0	0	0	0	0	0	0	0	0	0
14	2928	1.4144	AGCAGATGATACAGTATTAGAAGG	2	7	0	0	1	1	1	1	1	0.5	0	0.5	0	0	0	0	0	0	0	0	0	0	0	0	0	0
15	2928	1.4144	AGCAGATGATACAGTACTAGCAGA	1	3	0	0	1	1	0	0	0	0.5	0	0.5	0	0	0	0	0	0	0	-1	0	0	0	0	0	0
16	2928	1.4144	AGCAGATGACACAGTATTAGAAGA	31	7	0	0	1	1	1	1	1	0.5	0	0.5	0	0	0	0	0	0	0	0	0	0	0	0	0	0
17	2928	1.4144	AGCAGATGGTACAGTATTAGAAGA	1	7	0	0	1	1	1	1	1	0.5	0	0.5	0	0	0	0	0	0	0	0	0	0	0	0	0	0
18	2928	1.4144	GGCAGATGATACAGTATTGGAAGA	1	6	0	0	1	1	1	0	1	0.5	0	0.5	0	0	0	0	0	0	0	0	0	0	0	0	0	0
19	2928	1.4144	GGCAGATGATACAGTATTAGAGGA	2	3	0	0	0	0	0	0	1	0.5	0	0.5	0	0	0	0	0	0	0	0	0	0	0	0	0	0
20	2928	1.4144	GGCAGATAATACAGTATTAGAAGA	1	7	0	0	1	1	1	1	1	0.5	0	0.5	0	0	0	0	0	0	0	0	0	0	0	0	0	0
21	2928	1.4144	AGCAGACGATACGGTATTAGAAGA	1	6.5	0	0	1	1	1	1	1	0.5	0	0	0	0	0	0	0	0	0	0	0	0	0	0	0	0
22	2928	1.4144	GGCAGATGATACAGTATTAGAAGA	27	7	0	0	1	1	1	1	1	0.5	0	0.5	0	0	0	0	0	0	0	0	0	0	0	0	0	0
23	2928	1.4144	AGCAGATGATACAGTATGAGAAGA	1	6	0	0	1	1	1	0	1	0.5	0	0.5	0	0	0	0	0	0	0	0	0	0	0	0	0	0
24	2928	1.4144	GGCAGATGACACAGTATTAGAAGA	1	7	0	0	1	1	1	1	1	0.5	0	0.5	0	0	0	0	0	0	0	0	0	0	0	0	0	0
25	2928	1.4144	AGCAGATGATACGGTATTAGAAGA	3	6.5	0	0	1	1	1	1	1	0.5	0	0	0	0	0	0	0	0	0	0	0	0	0	0	0	0
26	2928	1.4144	AGCTGATGATACAGTATTAGAAGA	3	7	0	0	1	1	1	1	1	0.5	0	0.5	0	0	0	0	0	0	0	0	0	0	0	0	0	0
27	2928	1.4144	GGCAGATGATACAGTGTTAGAAGA	1	6	0	0	1	1	1	0	1	0.5	0	0.5	0	0	0	0	0	0	0	0	0	0	0	0	0	0
28	2928	1.4144	AGCCGATGATACAGTATTAGAAGA	3	7	0	0	1	1	1	1	1	0.5	0	0.5	0	0	0	0	0	0	0	0	0	0	0	0	0	0
29	2928	1.4144	AGCAGATGATACAGTAGTAGAAGA	16	6	0	0	1	1	1	0	1	0.5	0	0.5	0	0	0	0	0	0	0	0	0	0	0	0	0	0
30	2928	1.4144	AGCAGATGATACAGTGTTAGAAGA	33	6	0	0	1	1	1	0	1	0.5	0	0.5	0	0	0	0	0	0	0	0	0	0	0	0	0	0
31	2928	1.4144	AGCAGATGATACAGCATTAGAAGA	1	6	0	0	1	1	1	0	1	0.5	0	0.5	0	0	0	0	0	0	0	0	0	0	0	0	0	0
32	2928	1.4144	AGCTGATGATACAGTAGTAGAAGA	1	6	0	0	1	1	1	0	1	0.5	0	0.5	0	0	0	0	0	0	0	0	0	0	0	0	0	0
33	2928	1.4144	GGCAGACGATACAGTATTAGAAGA	1	7	0	0	1	1	1	1	1	0.5	0	0.5	0	0	0	0	0	0	0	0	0	0	0	0	0	0
34	2928	1.4144	AGCAGATGATACTGTATTAGAAGA	3	7	0	0	1	1	1	1	1	0.5	0	0.5	0	0	0	0	0	0	0	0	0	0	0	0	0	0
35	2928	1.4144	AGCAGATGATACAGTAATAGAAGA	1	7	0	0	1	1	1	1	1	0.5	0	0.5	0	0	0	0	0	0	0	0	0	0	0	0	0	0
36	2928	1.4144	AGCAGATGATACAGTACTAGAGGA	3	3	0	0	0	0	0	0	1	0.5	0	0.5	0	0	0	0	0	0	0	0	0	0	0	0	0	0
37	2928	1.4144	AGCAGATGATCCAGTATTAGAAGA	1	7	0	0	1	1	1	1	1	0.5	0	0.5	0	0	0	0	0	0	0	0	0	0	0	0	0	0
38	2928	1.4144	AGCAGATGATACAGTGTTAGAGGA	2	3	0	0	0	0	0	0	1	0.5	0	0.5	0	0	0	0	0	0	0	0	0	0	0	0	0	0
39	2928	1.4144	AGCAGATGATACAGTATTAGGAAG	1	4	0	0	1	1	1	0	0	0.5	0	0.5	0	0	0	0	0	0	0	-1	0	0	0	0	0	0
40	2928	1.4144	AGCAGATGATACAGTATTGGAAGA	15	6	0	0	1	1	1	0	1	0.5	0	0.5	0	0	0	0	0	0	0	0	0	0	0	0	0	0
41	2928	1.4144	AGCAGATGATACAGTATTAGGAGA	4	4	0	0	1	1	1	0	0	0.5	0	0.5	0	0	0	0	0	0	0	-1	0	0	0	0	0	0
42	2928	1.4144	AGCAGATGACACAGTACTAGAAGA	2	6	0	0	1	1	1	0	1	0.5	0	0.5	0	0	0	0	0	0	0	0	0	0	0	0	0	0
43	2928	1.4144	AGCAGATGTTACAGTATTAGAAGA	1	7	0	0	1	1	1	1	1	0.5	0	0.5	0	0	0	0	0	0	0	0	0	0	0	0	0	0
44	2928	1.4144	GGCTGATGATACAGTATTAGAAGA	1	7	0	0	1	1	1	1	1	0.5	0	0.5	0	0	0	0	0	0	0	0	0	0	0	0	0	0
45	2928	1.4144	AGCAGATGATACAGTATTAGAAGA	918	7	0	0	1	1	1	1	1	0.5	0	0.5	0	0	0	0	0	0	0	0	0	0	0	0	0	0
46	2928	1.4144	AGCAGACGATACAGTATTAGAAGA	7	7	0	0	1	1	1	1	1	0.5	0	0.5	0	0	0	0	0	0	0	0	0	0	0	0	0	0
W2 for GENOME_DNA_GroupM_plus_Recombinants
d No. V	e Win start	f Info_E.	g Sequence	h No. seqs	I Score	1	2	3	4	5	6	7	8	9	10	11	12	13	14	15	16	17	18	19	20	21	22	23	24
1	5444	1.55627	AGACAGCAGTACAGATGGCGGTAT	1	0.5	0	0.5	0	0	0	0	0	0	0	0.5	0.5	0	0	0	0	0	0	-1	0	0	0	0	0	0		4747-4770
2	5444	1.55627	AGACAGCAGTGCAGATGGCAGTAT	2	0.5	0	0.5	1	0	0	0	0	0	0	0.5	0.5	0	0	0	0	0	0	-1	0	0	0	0	-1	0
3	5444	1.55627	AGACAGCAGTACTGATGGCAGTAT	1	1.5	0	0.5	1	0	0	0	0	0	0	0.5	0.5	0	0	0	0	0	0	-1	0	0	0	0	0	0
4	5444	1.55627	AGACAGCAGTACAGATGGCAGTAT	121	1.5	0	0.5	1	0	0	0	0	0	0	0.5	0.5	0	0	0	0	0	0	-1	0	0	0	0	0	0
5	5444	1.55627	AGACAGCAGTACAGATGGCAGTAC	2	1	0	0	1	0	0	0	0	0	0	0.5	0.5	0	0	0	0	0	0	-1	0	0	0	0	0	0
6	5444	1.55627	GGACAGCAGTACAGATGGCAGTAT	2	1.5	0	0.5	1	0	0	0	0	0	0	0.5	0.5	0	0	0	0	0	0	-1	0	0	0	0	0	0
7	5444	1.55627	AGACAGCAGTACAAATGGCAGTAC	16	1	0	0	1	0	0	0	0	0	0	0.5	0.5	0	0	0	0	0	0	-1	0	0	0	0	0	0
8	5444	1.55627	AGACAGCTGTACAAATGGCAGTAT	4	2.5	0	0.5	1	0	0	0	0	0	0	0.5	0.5	0	0	0	0	0	0	-1	0	0	0	0	0	0
9	5444	1.55627	AGACAGCCGTACAAATGGCAGTAT	2	1.5	0	0.5	1	0	0	0	0	0	0	0.5	0.5	0	0	0	0	0	0	-1	0	0	0	0	0	0
10	5444	1.55627	AGACAGCAGTACTAATGGCAGTAT	4	2.5	0	0.5	1	0	0	0	0	0	0	0.5	0.5	0	0	0	0	0	0	-1	0	0	0	0	0	0
11	5444	1.55627	AGACAGCAGTACAAATGGCAGTCC	1	1	0	0	1	0	0	0	0	0	0	0.5	0.5	0	0	0	0	0	0	-1	0	0	0	0	0	0
12	5444	1.55627	AGACAGCAGTCCAAATGGCAGTAT	4	1.5	0	0.5	1	0	0	0	0	0	0	0.5	0.5	0	0	0	0	0	0	-1	0	0	0	0	0	0
13	5444	1.55627	AGACAGCAGTACAAGTGGCAGTAT	2	0.5	0	0.5	0	0	0	0	0	0	0	0.5	0.5	0	0	0	0	0	0	-1	0	0	0	0	0	0
14	5444	1.55627	AGACAGCAGTACAAATGGCAGTGT	26	1	0	0	1	0	0	0	0	0	0	0.5	0.5	0	0	0	0	0	0	-1	0	0	0	0	0	0
15	5444	1.55627	AGACAGCGGTACAAATGGCAGTGT	1	1	0	0	1	0	0	0	0	0	0	0.5	0.5	0	0	0	0	0	0	-1	0	0	0	0	0	0
16	5444	1.55627	AGACAGTAGTACAAATGGCAGTAT	1	2.5	0	0.5	1	0	0	0	0	0	0	0.5	0.5	0	0	0	0	0	0	-1	0	0	0	0	0	0
17	5444	1.55627	AGACAGCAGTACAAATGGCAGCAT	2	0.5	0	0.5	0	0	0	0	0	0	0	0.5	0.5	0	0	0	0	0	0	-1	0	0	0	0	0	0
18	5444	1.55627	AGACAGCAGTACCAATGGCAGTAT	1	1	0	0.5	1	0	0	0	0	0	0	0	0.5	0	0	0	0	0	0	-1	0	0	0	0	0	0
19	5444	1.55627	AGACAGCAGTACAAATGGCCGTAT	1	0.5	0	0.5	0	0	0	0	0	0	0	0.5	0.5	0	0	0	0	0	0	-1	0	0	0	0	0	0
20	5444	1.55627	CGACAGCAGTACAAATGGCAGTAT	1	1.5	0	0.5	1	0	0	0	0	0	0	0.5	0.5	0	0	0	0	0	0	-1	0	0	0	0	0	0
21	5444	1.55627	TGACAGCAGGACAAATGGCAGTGT	1	1	0	0	1	0	0	0	0	0	0	0.5	0.5	0	0	0	0	0	0	-1	0	0	0	0	0	0
22	5444	1.55627	AGACAGCAGTACAAATGGCAGTAT	800	2.5	0	0.5	1	0	0	0	0	0	0	0.5	0.5	0	0	0	0	0	0	-1	0	0	0	0	0	0
23	5444	1.55627	AGACAGCAGTACAGATGGCAGTGT	3	1	0	0	1	0	0	0	0	0	0	0.5	0.5	0	0	0	0	0	0	-1	0	0	0	0	0	0
24	5444	1.55627	AGACAGCAGTACAAATGGCTGTAT	1	2.5	0	0.5	1	0	0	0	0	0	0	0.5	0.5	0	0	0	0	0	0	-1	0	0	0	0	0	0
25	5444	1.55627	AGACAGCAGTCCAGATGGCAGTAT	1	1.5	0	0.5	1	0	0	0	0	0	0	0.5	0.5	0	0	0	0	0	0	-1	0	0	0	0	0	0
26	5444	1.55627	GGACAGCAGTACAAATGGCAGTAT	14	1.5	0	0.5	1	0	0	0	0	0	0	0.5	0.5	0	0	0	0	0	0	-1	0	0	0	0	0	0
27	5444	1.55627	AGACAGCATTACAAATGGCAGTAT	2	2.5	0	0.5	1	0	0	0	0	0	0	0.5	0.5	0	0	0	0	0	0	-1	0	0	0	0	0	0
28	5444	1.55627	AGAGAGCAGTACAAATGGCAGTAT	1	2.5	0	0.5	1	0	0	0	0	0	0	0.5	0.5	0	0	0	0	0	0	-1	0	0	0	0	0	0
29	5444	1.55627	AGACAGCAGTACAAATGGCGGTAT	6	0.5	0	0.5	0	0	0	0	0	0	0	0.5	0.5	0	0	0	0	0	0	-1	0	0	0	0	0	0
30	5444	1.55627	AGGCAGCAGTACAAATGGCAGTAT	2	1.5	0	0.5	1	0	0	0	0	0	0	0.5	0.5	0	0	0	0	0	0	-1	0	0	0	0	0	0
31	5444	1.55627	AGACAGCAATACAAATGGCAGTAT	1	2.5	0	0.5	1	0	0	0	0	0	0	0.5	0.5	0	0	0	0	0	0	-1	0	0	0	0	0	0
32	5444	1.55627	AGACAGCAGTTCAGATGGCAGTAT	1	1.5	0	0.5	1	0	0	0	0	0	0	0.5	0.5	0	0	0	0	0	0	-1	0	0	0	0	0	0
33	5444	1.55627	AGACAGCAGTACACATGGCAGTAT	1	1.5	0	0.5	1	0	0	0	0	0	0	0.5	0.5	0	0	0	0	0	0	-1	0	0	0	0	0	0
34	5444	1.55627	AGACAGCAGTGCAAATGGCAGTAT	29	0.5	0	0.5	1	0	0	0	0	0	0	0.5	0.5	0	0	0	0	0	0	-1	0	0	0	0	-1	0
35	5444	1.55627	AGACAGCGGTACAGATGGCAGTAT	1	1.5	0	0.5	1	0	0	0	0	0	0	0.5	0.5	0	0	0	0	0	0	-1	0	0	0	0	0	0
36	5444	1.55627	AGACAGCAGTACAAATGGCAGTCT	2	1	0	0	1	0	0	0	0	0	0	0.5	0.5	0	0	0	0	0	0	-1	0	0	0	0	0	0
37	5444	1.55627	AGACGGCAGTACAGATGGCAGTAT	1	2	0	0.5	1	0	0	0	0	0.5	0	0.5	0.5	0	0	0	0	0	0	-1	0	0	0	0	0	0
38	5444	1.55627	AGACAGCAGTGCAAATGGCAGTGT	1	0	0	0	1	0	0	0	0	0	0	0.5	0.5	0	0	0	0	0	0	-1	0	0	0	0	-1	0
39	5444	1.55627	AGACAGCAGTACAACTGGCAGTAT	1	0.5	0	0.5	0	0	0	0	0	0	0	0.5	0.5	0	0	0	0	0	0	-1	0	0	0	0	0	0
40	5444	1.55627	GGACAGCAGTACAAATGGCAGTAC	2	1	0	0	1	0	0	0	0	0	0	0.5	0.5	0	0	0	0	0	0	-1	0	0	0	0	0	0
41	5444	1.55627	AGACAGCGGTACAAATGGCAGTAT	7	1.5	0	0.5	1	0	0	0	0	0	0	0.5	0.5	0	0	0	0	0	0	-1	0	0	0	0	0	0
42	5444	1.55627	AGACGGCAGTACAAATGGCAGTAT	4	2	0	0.5	1	0	0	0	0	0.5	0	0.5	0.5	0	0	0	0	0	0	-1	0	0	0	0	0	0
43	5444	1.55627	AGACAGCAGTTCAAATGGCAGTAT	1	2.5	0	0.5	1	0	0	0	0	0	0	0.5	0.5	0	0	0	0	0	0	-1	0	0	0	0	0	0
44	5444	1.55627	AGACAGCACTACAAATGGCAGTAT	1	2.5	0	0.5	1	0	0	0	0	0	0	0.5	0.5	0	0	0	0	0	0	-1	0	0	0	0	0	0
a MSA	POL_DNA_All_Subtypes
b Size	1250
c In_Seqs	1160
d No. V	e Win start	f Info_E.	g Sequence	h No. seqs	I Score	1	2	3	4	5	6	7	8	9	10	11	12	13	14	15	16	17	18	19	20	21	22	23	24
1	411	1.59712	AGCAGATGACACAGTGCTAGAAGA	1	4	0	0	1	1	0	0	1	0.5	0	0.5	0	0	0	0	0	0	0	0	0	0	0	0	0	0		2333-2356
2	411	1.59712	AGCAGATGACACAGTATTAGAAGG	1	7	0	0	1	1	1	1	1	0.5	0	0.5	0	0	0	0	0	0	0	0	0	0	0	0	0	0
3	411	1.59712	AGCAGATGACACAGTATTAGAGGA	3	3	0	0	0	0	0	0	1	0.5	0	0.5	0	0	0	0	0	0	0	0	0	0	0	0	0	0
4	411	1.59712	AGCAGACGATACAGTACTAGAGGA	1	2	0	0	0	0	0	0	1	0.5	0	0.5	0	0	0	0	0	0	0	0	0	0	0	0	0	0
5	411	1.59712	CGCAGATGATACAGTATTAGAAGA	1	7	0	0	1	1	1	1	1	0.5	0	0.5	0	0	0	0	0	0	0	0	0	0	0	0	0	0
6	411	1.59712	AGCAGATGATACAGTATTAGAGGA	15	3	0	0	0	0	0	0	1	0.5	0	0.5	0	0	0	0	0	0	0	0	0	0	0	0	0	0
7	411	1.59712	AGCGGATGATACAGTATTAGAAGA	6	7	0	0	1	1	1	1	1	0.5	0	0.5	0	0	0	0	0	0	0	0	0	0	0	0	0	0
8	411	1.59712	AGCAGATGATACCGTATTAGAAGA	3	6.5	0	0	1	1	1	1	1	0.5	0	0	0	0	0	0	0	0	0	0	0	0	0	0	0	0
9	411	1.59712	AGCAGATGATACAGTCTTAGAAGA	9	6	0	0	1	1	1	0	1	0.5	0	0.5	0	0	0	0	0	0	0	0	0	0	0	0	0	0
10	411	1.59712	AGCAGATGATACAGTACTAGAAGA	17	6	0	0	1	1	1	0	1	0.5	0	0.5	0	0	0	0	0	0	0	0	0	0	0	0	0	0
11	411	1.59712	AGCAGATGATACAGTATTAGCAGA	3	4	0	0	1	1	1	0	0	0.5	0	0.5	0	0	0	0	0	0	0	-1	0	0	0	0	0	0
12	411	1.59712	AGCAGATGATACAGTATTGGAGGA	1	3	0	0	0	0	0	0	1	0.5	0	0.5	0	0	0	0	0	0	0	0	0	0	0	0	0	0
13	411	1.59712	AGCAGGTGATACAGTATTAGAAGA	2	7	0	0	1	1	1	1	1	0.5	0	0.5	0	0	0	0	0	0	0	0	0	0	0	0	0	0
14	411	1.59712	AGCAGATGACACAGTGTTAGAAGA	1	6	0	0	1	1	1	0	1	0.5	0	0.5	0	0	0	0	0	0	0	0	0	0	0	0	0	0
15	411	1.59712	AGCAGATGATACAGTATTAGAAGG	3	7	0	0	1	1	1	1	1	0.5	0	0.5	0	0	0	0	0	0	0	0	0	0	0	0	0	0
16	411	1.59712	AGCAGATGATACAGTACTAGCAGA	1	3	0	0	1	1	0	0	0	0.5	0	0.5	0	0	0	0	0	0	0	-1	0	0	0	0	0	0
17	411	1.59712	AGCAGATGACACAGTATTAGAAGA	31	7	0	0	1	1	1	1	1	0.5	0	0.5	0	0	0	0	0	0	0	0	0	0	0	0	0	0
18	411	1.59712	AGCTGATGATACAGTAATAGAAGA	5	7	0	0	1	1	1	1	1	0.5	0	0.5	0	0	0	0	0	0	0	0	0	0	0	0	0	0
19	411	1.59712	AGCAGATAATACAGTATTCGAAGA	1	6	0	0	1	1	1	0	1	0.5	0	0.5	0	0	0	0	0	0	0	0	0	0	0	0	0	0
20	411	1.59712	AGCAGATGGTACAGTATTAGAAGA	1	7	0	0	1	1	1	1	1	0.5	0	0.5	0	0	0	0	0	0	0	0	0	0	0	0	0	0
21	411	1.59712	GGCAGATGATACAGTATTGGAAGA	1	6	0	0	1	1	1	0	1	0.5	0	0.5	0	0	0	0	0	0	0	0	0	0	0	0	0	0
22	411	1.59712	GGCAGATGATACAGTATTAGAGGA	2	3	0	0	0	0	0	0	1	0.5	0	0.5	0	0	0	0	0	0	0	0	0	0	0	0	0	0
23	411	1.59712	GGCAGATAATACAGTATTAGAAGA	1	7	0	0	1	1	1	1	1	0.5	0	0.5	0	0	0	0	0	0	0	0	0	0	0	0	0	0
24	411	1.59712	AGCTGATGATACAGTGATAGAAGA	1	6	0	0	1	1	1	0	1	0.5	0	0.5	0	0	0	0	0	0	0	0	0	0	0	0	0	0
25	411	1.59712	AGCAGACGATACGGTATTAGAAGA	1	6.5	0	0	1	1	1	1	1	0.5	0	0	0	0	0	0	0	0	0	0	0	0	0	0	0	0
26	411	1.59712	GGCAGATGATACAGTATTAGAAGA	26	7	0	0	1	1	1	1	1	0.5	0	0.5	0	0	0	0	0	0	0	0	0	0	0	0	0	0
27	411	1.59712	AGCAGATGATGCAGTATTAGAAGA	1	6	0	0	1	1	1	1	1	0.5	0	0.5	0	0	0	0	0	0	0	0	0	0	0	0	-1	0
28	411	1.59712	AGCTGATGATACAGTAATAGAGAG	1	3	0	0	0	0	0	0	1	0.5	0	0.5	0	0	0	0	0	0	0	0	0	0	0	0	0	0
29	411	1.59712	GGCAGATGACACAGTATTAGAAGA	2	7	0	0	1	1	1	1	1	0.5	0	0.5	0	0	0	0	0	0	0	0	0	0	0	0	0	0
30	411	1.59712	AGCAGATGATACGGTATTAGAAGA	3	6.5	0	0	1	1	1	1	1	0.5	0	0	0	0	0	0	0	0	0	0	0	0	0	0	0	0
31	411	1.59712	AGCTGATGATACAGTATTAGAAGA	4	7	0	0	1	1	1	1	1	0.5	0	0.5	0	0	0	0	0	0	0	0	0	0	0	0	0	0
32	411	1.59712	GGCAGATGATACAGTGTTAGAAGA	1	6	0	0	1	1	1	0	1	0.5	0	0.5	0	0	0	0	0	0	0	0	0	0	0	0	0	0
33	411	1.59712	AGCCGATGATACAGTATTAGAAGA	3	7	0	0	1	1	1	1	1	0.5	0	0.5	0	0	0	0	0	0	0	0	0	0	0	0	0	0
34	411	1.59712	AGCAGATGATACAGTAGTAGAAGA	16	6	0	0	1	1	1	0	1	0.5	0	0.5	0	0	0	0	0	0	0	0	0	0	0	0	0	0
35	411	1.59712	AGCAGATGATACAGTGTTAGAAGA	30	6	0	0	1	1	1	0	1	0.5	0	0.5	0	0	0	0	0	0	0	0	0	0	0	0	0	0
36	411	1.59712	GGCAGATGATACAGTACTAGAGGA	1	2	0	0	0	0	0	0	1	0.5	0	0.5	0	0	0	0	0	0	0	0	0	0	0	0	0	0
37	411	1.59712	AGCAGATGATACAGCATTAGAAGA	1	6	0	0	1	1	1	0	1	0.5	0	0.5	0	0	0	0	0	0	0	0	0	0	0	0	0	0
38	411	1.59712	AGCTGATGATACAGTAGTAGAAGA	1	6	0	0	1	1	1	0	1	0.5	0	0.5	0	0	0	0	0	0	0	0	0	0	0	0	0	0
39	411	1.59712	GGCAGACGATACAGTATTAGAAGA	1	7	0	0	1	1	1	1	1	0.5	0	0.5	0	0	0	0	0	0	0	0	0	0	0	0	0	0
40	411	1.59712	AGCAGATGATACTGTATTAGAAGA	3	7	0	0	1	1	1	1	1	0.5	0	0.5	0	0	0	0	0	0	0	0	0	0	0	0	0	0
41	411	1.59712	AGCAGATGATACAGTAATAGAAGA	1	7	0	0	1	1	1	1	1	0.5	0	0.5	0	0	0	0	0	0	0	0	0	0	0	0	0	0
42	411	1.59712	AGCAGATGATACAGTACTAGAGGA	3	3	0	0	0	0	0	0	1	0.5	0	0.5	0	0	0	0	0	0	0	0	0	0	0	0	0	0
43	411	1.59712	AGCAGATGATCCAGTATTAGAAGA	1	7	0	0	1	1	1	1	1	0.5	0	0.5	0	0	0	0	0	0	0	0	0	0	0	0	0	0
44	411	1.59712	AGCAGATGATACAGTGTTAGAGGA	2	3	0	0	0	0	0	0	1	0.5	0	0.5	0	0	0	0	0	0	0	0	0	0	0	0	0	0
45	411	1.59712	AGCAGATGATACAGTATTAGGAAG	1	4	0	0	1	1	1	0	0	0.5	0	0.5	0	0	0	0	0	0	0	-1	0	0	0	0	0	0
46	411	1.59712	AGCAGATGATACAGTATTGGAAGA	15	6	0	0	1	1	1	0	1	0.5	0	0.5	0	0	0	0	0	0	0	0	0	0	0	0	0	0
47	411	1.59712	AGCAGATGATACAGTATTAGGAGA	3	4	0	0	1	1	1	0	0	0.5	0	0.5	0	0	0	0	0	0	0	-1	0	0	0	0	0	0
48	411	1.59712	AGCAGATGACACAGTACTAGAAGA	2	6	0	0	1	1	1	0	1	0.5	0	0.5	0	0	0	0	0	0	0	0	0	0	0	0	0	0
49	411	1.59712	AGCAGATGTTACAGTATTAGAAGA	1	7	0	0	1	1	1	1	1	0.5	0	0.5	0	0	0	0	0	0	0	0	0	0	0	0	0	0
50	411	1.59712	AGCAGATGATACAGTATTAGAAGA	916	7	0	0	1	1	1	1	1	0.5	0	0.5	0	0	0	0	0	0	0	0	0	0	0	0	0	0
51	411	1.59712	GGCAGATGATACAGTGCTAGAAGA	1	4	0	0	1	1	0	0	1	0.5	0	0.5	0	0	0	0	0	0	0	0	0	0	0	0	0	0
52	411	1.59712	AGCAGACGATACAGTATTAGAAGA	8	7	0	0	1	1	1	1	1	0.5	0	0.5	0	0	0	0	0	0	0	0	0	0	0	0	0	0
W2 for POL_DNA_All_Subtypes
d No. V	e Win start	f Info_E.	g Sequence	h No. seqs	I Score	1	2	3	4	5	6	7	8	9	10	11	12	13	14	15	16	17	18	19	20	21	22	23	24
1	2969	1.70317	AGACAGCAGTACAGATGGCGGTAT	1	0.5	0	0.5	0	0	0	0	0	0	0	0.5	0.5	0	0	0	0	0	0	-1	0	0	0	0	0	0		4747-4770
2	2969	1.70317	AGACAGCAGTGCAGATGGCAGTAT	2	0.5	0	0.5	1	0	0	0	0	0	0	0.5	0.5	0	0	0	0	0	0	-1	0	0	0	0	-1	0
3	2969	1.70317	AGACAGCAGTACTGATGGCAGTAT	1	1.5	0	0.5	1	0	0	0	0	0	0	0.5	0.5	0	0	0	0	0	0	-1	0	0	0	0	0	0
4	2969	1.70317	AGACAGCAGTGCAAATGGCAGTCT	1	0	0	0	1	0	0	0	0	0	0	0.5	0.5	0	0	0	0	0	0	-1	0	0	0	0	-1	0
5	2969	1.70317	AGACAGCAGTACAGATGGCAGTAT	121	1.5	0	0.5	1	0	0	0	0	0	0	0.5	0.5	0	0	0	0	0	0	-1	0	0	0	0	0	0
6	2969	1.70317	AGACAGCAGTACAGATGGCAGTAC	2	1	0	0	1	0	0	0	0	0	0	0.5	0.5	0	0	0	0	0	0	-1	0	0	0	0	0	0
7	2969	1.70317	GGACAGCAGTACAGATGGCAGTAT	2	1.5	0	0.5	1	0	0	0	0	0	0	0.5	0.5	0	0	0	0	0	0	-1	0	0	0	0	0	0
8	2969	1.70317	AGACAGCAGTACAAATGGCAGTAC	17	1	0	0	1	0	0	0	0	0	0	0.5	0.5	0	0	0	0	0	0	-1	0	0	0	0	0	0
9	2969	1.70317	AGACAGCTGTACAAATGGCAGTAT	2	2.5	0	0.5	1	0	0	0	0	0	0	0.5	0.5	0	0	0	0	0	0	-1	0	0	0	0	0	0
10	2969	1.70317	AGACAGCCGTACAAATGGCAGTAT	2	1.5	0	0.5	1	0	0	0	0	0	0	0.5	0.5	0	0	0	0	0	0	-1	0	0	0	0	0	0
11	2969	1.70317	AGACAGCAGTACTAATGGCAGTAT	4	2.5	0	0.5	1	0	0	0	0	0	0	0.5	0.5	0	0	0	0	0	0	-1	0	0	0	0	0	0
12	2969	1.70317	AGACAGCTGTCCAAATGGCAGTCT	1	1	0	0	1	0	0	0	0	0	0	0.5	0.5	0	0	0	0	0	0	-1	0	0	0	0	0	0
13	2969	1.70317	AGACAGCAGTACAAATGGCAGTCC	1	1	0	0	1	0	0	0	0	0	0	0.5	0.5	0	0	0	0	0	0	-1	0	0	0	0	0	0
14	2969	1.70317	AGACAGCAGTCCAAATGGCAGTAT	4	1.5	0	0.5	1	0	0	0	0	0	0	0.5	0.5	0	0	0	0	0	0	-1	0	0	0	0	0	0
15	2969	1.70317	AGACAGCAGTACAAGTGGCAGTAT	2	0.5	0	0.5	0	0	0	0	0	0	0	0.5	0.5	0	0	0	0	0	0	-1	0	0	0	0	0	0
16	2969	1.70317	AGACAGCAGTACAAATGGCAGTGT	27	1	0	0	1	0	0	0	0	0	0	0.5	0.5	0	0	0	0	0	0	-1	0	0	0	0	0	0
17	2969	1.70317	AGACAGCGGTACAAATGGCAGTGT	1	1	0	0	1	0	0	0	0	0	0	0.5	0.5	0	0	0	0	0	0	-1	0	0	0	0	0	0
18	2969	1.70317	AGACAGTAGTACAAATGGCAGTAT	1	2.5	0	0.5	1	0	0	0	0	0	0	0.5	0.5	0	0	0	0	0	0	-1	0	0	0	0	0	0
19	2969	1.70317	AGACAGCAGTACAAATGGCAGCAT	2	0.5	0	0.5	0	0	0	0	0	0	0	0.5	0.5	0	0	0	0	0	0	-1	0	0	0	0	0	0
20	2969	1.70317	AGACAGCAGTACCAATGGCAGTAT	1	1	0	0.5	1	0	0	0	0	0	0	0	0.5	0	0	0	0	0	0	-1	0	0	0	0	0	0
21	2969	1.70317	AGACAGCAGTACAAATGGCCGTAT	1	0.5	0	0.5	0	0	0	0	0	0	0	0.5	0.5	0	0	0	0	0	0	-1	0	0	0	0	0	0
22	2969	1.70317	CGACAGCAGTACAAATGGCAGTAT	1	1.5	0	0.5	1	0	0	0	0	0	0	0.5	0.5	0	0	0	0	0	0	-1	0	0	0	0	0	0
23	2969	1.70317	TGACAGCAGGACAAATGGCAGTGT	1	1	0	0	1	0	0	0	0	0	0	0.5	0.5	0	0	0	0	0	0	-1	0	0	0	0	0	0
24	2969	1.70317	AGACAGCAGTACAAATGGCAGTAT	797	2.5	0	0.5	1	0	0	0	0	0	0	0.5	0.5	0	0	0	0	0	0	-1	0	0	0	0	0	0
25	2969	1.70317	AGACAGCAGTACAAACGGCAGTAT	1	0	0	0.5	0	0	0	0	0	0	0	0.5	0	0	0	0	0	0	0	-1	0	0	0	0	0	0
26	2969	1.70317	AGACAGCAGTACAGATGGCAGTGT	3	1	0	0	1	0	0	0	0	0	0	0.5	0.5	0	0	0	0	0	0	-1	0	0	0	0	0	0
27	2969	1.70317	AGACAGCAGTACAAATGGCTGTAT	1	2.5	0	0.5	1	0	0	0	0	0	0	0.5	0.5	0	0	0	0	0	0	-1	0	0	0	0	0	0
28	2969	1.70317	AGACAGCAGTCCAGATGGCAGTAT	1	1.5	0	0.5	1	0	0	0	0	0	0	0.5	0.5	0	0	0	0	0	0	-1	0	0	0	0	0	0
29	2969	1.70317	GGACAGCAGTACAAATGGCAGTAT	16	1.5	0	0.5	1	0	0	0	0	0	0	0.5	0.5	0	0	0	0	0	0	-1	0	0	0	0	0	0
30	2969	1.70317	AGACAGCATTACAAATGGCAGTAT	2	2.5	0	0.5	1	0	0	0	0	0	0	0.5	0.5	0	0	0	0	0	0	-1	0	0	0	0	0	0
31	2969	1.70317	AGAGAGCAGTACAAATGGCAGTAT	1	2.5	0	0.5	1	0	0	0	0	0	0	0.5	0.5	0	0	0	0	0	0	-1	0	0	0	0	0	0
32	2969	1.70317	AGACAGCAGTACAAATGGCGGTAT	6	0.5	0	0.5	0	0	0	0	0	0	0	0.5	0.5	0	0	0	0	0	0	-1	0	0	0	0	0	0
33	2969	1.70317	AGGCAGCAGTACAAATGGCAGTAT	2	1.5	0	0.5	1	0	0	0	0	0	0	0.5	0.5	0	0	0	0	0	0	-1	0	0	0	0	0	0
34	2969	1.70317	AGACAGCAATACAAATGGCAGTAT	1	2.5	0	0.5	1	0	0	0	0	0	0	0.5	0.5	0	0	0	0	0	0	-1	0	0	0	0	0	0
35	2969	1.70317	AGACAGCAGTTCAGATGGCAGTAT	1	1.5	0	0.5	1	0	0	0	0	0	0	0.5	0.5	0	0	0	0	0	0	-1	0	0	0	0	0	0
36	2969	1.70317	AGACAGCAGTACACATGGCAGTAT	1	1.5	0	0.5	1	0	0	0	0	0	0	0.5	0.5	0	0	0	0	0	0	-1	0	0	0	0	0	0
37	2969	1.70317	AGACAGCAGTGCAAATGGCAGTAT	26	0.5	0	0.5	1	0	0	0	0	0	0	0.5	0.5	0	0	0	0	0	0	-1	0	0	0	0	-1	0
38	2969	1.70317	AGACAGCGGTACAGATGGCAGTAT	1	1.5	0	0.5	1	0	0	0	0	0	0	0.5	0.5	0	0	0	0	0	0	-1	0	0	0	0	0	0
39	2969	1.70317	AGACAGCAGTACAAATGGCAGTCT	3	1	0	0	1	0	0	0	0	0	0	0.5	0.5	0	0	0	0	0	0	-1	0	0	0	0	0	0
40	2969	1.70317	AGACAGCAGTAGTAATGGCAGTGC	1	1	0	0	1	0	0	0	0	0	0	0.5	0.5	0	0	0	0	0	0	-1	0	0	0	0	0	0
41	2969	1.70317	AGACAGCAGTTCAAATGGCAGTGT	1	1	0	0	1	0	0	0	0	0	0	0.5	0.5	0	0	0	0	0	0	-1	0	0	0	0	0	0
42	2969	1.70317	AGACGGCAGTACAGATGGCAGTAT	2	2	0	0.5	1	0	0	0	0	0.5	0	0.5	0.5	0	0	0	0	0	0	-1	0	0	0	0	0	0
43	2969	1.70317	AGACAGCAGTGCAAATGGCAGTGT	1	0	0	0	1	0	0	0	0	0	0	0.5	0.5	0	0	0	0	0	0	-1	0	0	0	0	-1	0
44	2969	1.70317	AGACAGCAGTACAACTGGCAGTAT	1	0.5	0	0.5	0	0	0	0	0	0	0	0.5	0.5	0	0	0	0	0	0	-1	0	0	0	0	0	0
45	2969	1.70317	GGACAGCAGTACAAATGGCAGTAC	2	1	0	0	1	0	0	0	0	0	0	0.5	0.5	0	0	0	0	0	0	-1	0	0	0	0	0	0
46	2969	1.70317	AGACAGCGGTACAAATGGCAGTAT	8	1.5	0	0.5	1	0	0	0	0	0	0	0.5	0.5	0	0	0	0	0	0	-1	0	0	0	0	0	0
47	2969	1.70317	AGACGGCAGTACAAATGGCAGTAT	4	2	0	0.5	1	0	0	0	0	0.5	0	0.5	0.5	0	0	0	0	0	0	-1	0	0	0	0	0	0
48	2969	1.70317	AGACAGCAGTTCAAATGGCAGTAT	1	2.5	0	0.5	1	0	0	0	0	0	0	0.5	0.5	0	0	0	0	0	0	-1	0	0	0	0	0	0
49	2969	1.70317	AGACAGCACTACAAATGGCAGTAT	1	2.5	0	0.5	1	0	0	0	0	0	0	0.5	0.5	0	0	0	0	0	0	-1	0	0	0	0	0	0
a MSA	GENOME_DNA_All_Subtype
b Size	1257
c In_Seqs	1169
d No. V	e Win start	f Info_E.	g Sequence	h No. seqs	I Score	1	2	3	4	5	6	7	8	9	10	11	12	13	14	15	16	17	18	19	20	21	22	23	24
1	2928	1.59825	AGCAGATGACACAGTGCTAGAAGA	1	4	0	0	1	1	0	0	1	0.5	0	0.5	0	0	0	0	0	0	0	0	0	0	0	0	0	0		2333-2356
2	2928	1.59825	AGCAGATGACACAGTATTAGAAGG	1	7	0	0	1	1	1	1	1	0.5	0	0.5	0	0	0	0	0	0	0	0	0	0	0	0	0	0
3	2928	1.59825	AGCAGATGACACAGTATTAGAGGA	3	3	0	0	0	0	0	0	1	0.5	0	0.5	0	0	0	0	0	0	0	0	0	0	0	0	0	0
4	2928	1.59825	AGCAGACGATACAGTACTAGAGGA	1	2	0	0	0	0	0	0	1	0.5	0	0.5	0	0	0	0	0	0	0	0	0	0	0	0	0	0
5	2928	1.59825	CGCAGATGATACAGTATTAGAAGA	1	7	0	0	1	1	1	1	1	0.5	0	0.5	0	0	0	0	0	0	0	0	0	0	0	0	0	0
6	2928	1.59825	AGCAGATGATACAGTATTAGAGGA	14	3	0	0	0	0	0	0	1	0.5	0	0.5	0	0	0	0	0	0	0	0	0	0	0	0	0	0
7	2928	1.59825	AGCGGATGATACAGTATTAGAAGA	7	7	0	0	1	1	1	1	1	0.5	0	0.5	0	0	0	0	0	0	0	0	0	0	0	0	0	0
8	2928	1.59825	AGCAGATGATACCGTATTAGAAGA	3	6.5	0	0	1	1	1	1	1	0.5	0	0	0	0	0	0	0	0	0	0	0	0	0	0	0	0
9	2928	1.59825	AGCAGATGATACAGTCTTAGAAGA	9	6	0	0	1	1	1	0	1	0.5	0	0.5	0	0	0	0	0	0	0	0	0	0	0	0	0	0
10	2928	1.59825	AGCAGATGATACAGTACTAGAAGA	17	6	0	0	1	1	1	0	1	0.5	0	0.5	0	0	0	0	0	0	0	0	0	0	0	0	0	0
11	2928	1.59825	AGCAGATGATACAGTATTAGCAGA	3	4	0	0	1	1	1	0	0	0.5	0	0.5	0	0	0	0	0	0	0	-1	0	0	0	0	0	0
12	2928	1.59825	AGCAGATGATACAGTATTGGAGGA	1	3	0	0	0	0	0	0	1	0.5	0	0.5	0	0	0	0	0	0	0	0	0	0	0	0	0	0
13	2928	1.59825	AGCAGGTGATACAGTATTAGAAGA	2	7	0	0	1	1	1	1	1	0.5	0	0.5	0	0	0	0	0	0	0	0	0	0	0	0	0	0
14	2928	1.59825	AGCAGATGACACAGTGTTAGAAGA	1	6	0	0	1	1	1	0	1	0.5	0	0.5	0	0	0	0	0	0	0	0	0	0	0	0	0	0
15	2928	1.59825	AGCAGATGATACAGTATTAGAAGG	3	7	0	0	1	1	1	1	1	0.5	0	0.5	0	0	0	0	0	0	0	0	0	0	0	0	0	0
16	2928	1.59825	AGCAGATGATACAGTACTAGCAGA	1	3	0	0	1	1	0	0	0	0.5	0	0.5	0	0	0	0	0	0	0	-1	0	0	0	0	0	0
17	2928	1.59825	AGCAGATGACACAGTATTAGAAGA	31	7	0	0	1	1	1	1	1	0.5	0	0.5	0	0	0	0	0	0	0	0	0	0	0	0	0	0
18	2928	1.59825	AGCTGATGATACAGTAATAGAAGA	5	7	0	0	1	1	1	1	1	0.5	0	0.5	0	0	0	0	0	0	0	0	0	0	0	0	0	0
19	2928	1.59825	AGCAGATGGTACAGTATTAGAAGA	1	7	0	0	1	1	1	1	1	0.5	0	0.5	0	0	0	0	0	0	0	0	0	0	0	0	0	0
20	2928	1.59825	GGCAGATGATACAGTATTGGAAGA	1	6	0	0	1	1	1	0	1	0.5	0	0.5	0	0	0	0	0	0	0	0	0	0	0	0	0	0
21	2928	1.59825	GGCAGATGATACAGTATTAGAGGA	2	3	0	0	0	0	0	0	1	0.5	0	0.5	0	0	0	0	0	0	0	0	0	0	0	0	0	0
22	2928	1.59825	GGCAGATAATACAGTATTAGAAGA	1	7	0	0	1	1	1	1	1	0.5	0	0.5	0	0	0	0	0	0	0	0	0	0	0	0	0	0
23	2928	1.59825	AGCTGATGATACAGTGATAGAAGA	1	6	0	0	1	1	1	0	1	0.5	0	0.5	0	0	0	0	0	0	0	0	0	0	0	0	0	0
24	2928	1.59825	AGCAGACGATACGGTATTAGAAGA	1	6.5	0	0	1	1	1	1	1	0.5	0	0	0	0	0	0	0	0	0	0	0	0	0	0	0	0
25	2928	1.59825	GGCAGATGATACAGTATTAGAAGA	27	7	0	0	1	1	1	1	1	0.5	0	0.5	0	0	0	0	0	0	0	0	0	0	0	0	0	0
26	2928	1.59825	AGCAGATGATACAGTATGAGAAGA	1	6	0	0	1	1	1	0	1	0.5	0	0.5	0	0	0	0	0	0	0	0	0	0	0	0	0	0
27	2928	1.59825	AGCTGATGATACAGTAATAGAGAG	1	3	0	0	0	0	0	0	1	0.5	0	0.5	0	0	0	0	0	0	0	0	0	0	0	0	0	0
28	2928	1.59825	GGCAGATGACACAGTATTAGAAGA	2	7	0	0	1	1	1	1	1	0.5	0	0.5	0	0	0	0	0	0	0	0	0	0	0	0	0	0
29	2928	1.59825	AGCAGATGATACGGTATTAGAAGA	3	6.5	0	0	1	1	1	1	1	0.5	0	0	0	0	0	0	0	0	0	0	0	0	0	0	0	0
30	2928	1.59825	AGCTGATGATACAGTATTAGAAGA	3	7	0	0	1	1	1	1	1	0.5	0	0.5	0	0	0	0	0	0	0	0	0	0	0	0	0	0
31	2928	1.59825	GGCAGATGATACAGTGTTAGAAGA	1	6	0	0	1	1	1	0	1	0.5	0	0.5	0	0	0	0	0	0	0	0	0	0	0	0	0	0
32	2928	1.59825	AGCCGATGATACAGTATTAGAAGA	3	7	0	0	1	1	1	1	1	0.5	0	0.5	0	0	0	0	0	0	0	0	0	0	0	0	0	0
33	2928	1.59825	AGCAGATGATACAGTAGTAGAAGA	18	6	0	0	1	1	1	0	1	0.5	0	0.5	0	0	0	0	0	0	0	0	0	0	0	0	0	0
34	2928	1.59825	AGCAGATGATACAGTGTTAGAAGA	33	6	0	0	1	1	1	0	1	0.5	0	0.5	0	0	0	0	0	0	0	0	0	0	0	0	0	0
35	2928	1.59825	GGCAGATGATACAGTACTAGAGGA	1	2	0	0	0	0	0	0	1	0.5	0	0.5	0	0	0	0	0	0	0	0	0	0	0	0	0	0
36	2928	1.59825	AGCAGATGATACAGCATTAGAAGA	1	6	0	0	1	1	1	0	1	0.5	0	0.5	0	0	0	0	0	0	0	0	0	0	0	0	0	0
37	2928	1.59825	AGCTGATGATACAGTAGTAGAAGA	1	6	0	0	1	1	1	0	1	0.5	0	0.5	0	0	0	0	0	0	0	0	0	0	0	0	0	0
38	2928	1.59825	GGCAGACGATACAGTATTAGAAGA	1	7	0	0	1	1	1	1	1	0.5	0	0.5	0	0	0	0	0	0	0	0	0	0	0	0	0	0
39	2928	1.59825	AGCAGATGATACTGTATTAGAAGA	3	7	0	0	1	1	1	1	1	0.5	0	0.5	0	0	0	0	0	0	0	0	0	0	0	0	0	0
40	2928	1.59825	AGCAGATGATACAGTAATAGAAGA	1	7	0	0	1	1	1	1	1	0.5	0	0.5	0	0	0	0	0	0	0	0	0	0	0	0	0	0
41	2928	1.59825	AGCAGATGATACAGTACTAGAGGA	3	3	0	0	0	0	0	0	1	0.5	0	0.5	0	0	0	0	0	0	0	0	0	0	0	0	0	0
42	2928	1.59825	AGCAGATGATCCAGTATTAGAAGA	1	7	0	0	1	1	1	1	1	0.5	0	0.5	0	0	0	0	0	0	0	0	0	0	0	0	0	0
43	2928	1.59825	AGCAGATGATACAGTGTTAGAGGA	2	3	0	0	0	0	0	0	1	0.5	0	0.5	0	0	0	0	0	0	0	0	0	0	0	0	0	0
44	2928	1.59825	AGCAGATGATACAGTATTAGGAAG	1	4	0	0	1	1	1	0	0	0.5	0	0.5	0	0	0	0	0	0	0	-1	0	0	0	0	0	0
45	2928	1.59825	AGCAGATGATACAGTATTGGAAGA	15	6	0	0	1	1	1	0	1	0.5	0	0.5	0	0	0	0	0	0	0	0	0	0	0	0	0	0
46	2928	1.59825	AGCAGATGATACAGTATTAGGAGA	4	4	0	0	1	1	1	0	0	0.5	0	0.5	0	0	0	0	0	0	0	-1	0	0	0	0	0	0
47	2928	1.59825	AGCAGATGACACAGTACTAGAAGA	2	6	0	0	1	1	1	0	1	0.5	0	0.5	0	0	0	0	0	0	0	0	0	0	0	0	0	0
48	2928	1.59825	AGCAGATGTTACAGTATTAGAAGA	1	7	0	0	1	1	1	1	1	0.5	0	0.5	0	0	0	0	0	0	0	0	0	0	0	0	0	0
49	2928	1.59825	GGCTGATGATACAGTATTAGAAGA	1	7	0	0	1	1	1	1	1	0.5	0	0.5	0	0	0	0	0	0	0	0	0	0	0	0	0	0
50	2928	1.59825	AGCAGATGATACAGTATTAGAAGA	920	7	0	0	1	1	1	1	1	0.5	0	0.5	0	0	0	0	0	0	0	0	0	0	0	0	0	0
51	2928	1.59825	GGCAGATGATACAGTGCTAGAAGA	1	4	0	0	1	1	0	0	1	0.5	0	0.5	0	0	0	0	0	0	0	0	0	0	0	0	0	0
52	2928	1.59825	AGCAGACGATACAGTATTAGAAGA	7	7	0	0	1	1	1	1	1	0.5	0	0.5	0	0	0	0	0	0	0	0	0	0	0	0	0	0
W2 for GENOME_DNA_All_Subtype
d No. V	e Win start	f Info_E.	g Sequence	h No. seqs	I Score	1	2	3	4	5	6	7	8	9	10	11	12	13	14	15	16	17	18	19	20	21	22	23	24
1	5444	1.67697	AGACAGCAGTACAGATGGCGGTAT	1	0.5	0	0.5	0	0	0	0	0	0	0	0.5	0.5	0	0	0	0	0	0	-1	0	0	0	0	0	0		2333-2356
2	5444	1.67697	AGACAGCAGTGCAGATGGCAGTAT	2	0.5	0	0.5	1	0	0	0	0	0	0	0.5	0.5	0	0	0	0	0	0	-1	0	0	0	0	-1	0
3	5444	1.67697	AGACAGCAGTACTGATGGCAGTAT	1	1.5	0	0.5	1	0	0	0	0	0	0	0.5	0.5	0	0	0	0	0	0	-1	0	0	0	0	0	0
4	5444	1.67697	AGACAGCAGTGCAAATGGCAGTCT	1	0	0	0	1	0	0	0	0	0	0	0.5	0.5	0	0	0	0	0	0	-1	0	0	0	0	-1	0
5	5444	1.67697	AGACAGCAGTACAGATGGCAGTAT	123	1.5	0	0.5	1	0	0	0	0	0	0	0.5	0.5	0	0	0	0	0	0	-1	0	0	0	0	0	0
6	5444	1.67697	AGACAGCAGTACAGATGGCAGTAC	2	1	0	0	1	0	0	0	0	0	0	0.5	0.5	0	0	0	0	0	0	-1	0	0	0	0	0	0
7	5444	1.67697	GGACAGCAGTACAGATGGCAGTAT	2	1.5	0	0.5	1	0	0	0	0	0	0	0.5	0.5	0	0	0	0	0	0	-1	0	0	0	0	0	0
8	5444	1.67697	AGACAGCAGTACAAATGGCAGTAC	16	1	0	0	1	0	0	0	0	0	0	0.5	0.5	0	0	0	0	0	0	-1	0	0	0	0	0	0
9	5444	1.67697	AGACAGCTGTACAAATGGCAGTAT	4	2.5	0	0.5	1	0	0	0	0	0	0	0.5	0.5	0	0	0	0	0	0	-1	0	0	0	0	0	0
10	5444	1.67697	AGACAGCCGTACAAATGGCAGTAT	2	1.5	0	0.5	1	0	0	0	0	0	0	0.5	0.5	0	0	0	0	0	0	-1	0	0	0	0	0	0
11	5444	1.67697	AGACAGCAGTACTAATGGCAGTAT	4	2.5	0	0.5	1	0	0	0	0	0	0	0.5	0.5	0	0	0	0	0	0	-1	0	0	0	0	0	0
12	5444	1.67697	AGACAGCAGTACAAATGGCAGTCC	1	1	0	0	1	0	0	0	0	0	0	0.5	0.5	0	0	0	0	0	0	-1	0	0	0	0	0	0
13	5444	1.67697	AGACAGCAGTCCAAATGGCAGTAT	4	1.5	0	0.5	1	0	0	0	0	0	0	0.5	0.5	0	0	0	0	0	0	-1	0	0	0	0	0	0
14	5444	1.67697	AGACAGCAGTACAAGTGGCAGTAT	2	0.5	0	0.5	0	0	0	0	0	0	0	0.5	0.5	0	0	0	0	0	0	-1	0	0	0	0	0	0
15	5444	1.67697	AGACAGCAGTACAAATGGCAGTGT	26	1	0	0	1	0	0	0	0	0	0	0.5	0.5	0	0	0	0	0	0	-1	0	0	0	0	0	0
16	5444	1.67697	AGACAGCGGTACAAATGGCAGTGT	1	1	0	0	1	0	0	0	0	0	0	0.5	0.5	0	0	0	0	0	0	-1	0	0	0	0	0	0
17	5444	1.67697	AGACAGTAGTACAAATGGCAGTAT	1	2.5	0	0.5	1	0	0	0	0	0	0	0.5	0.5	0	0	0	0	0	0	-1	0	0	0	0	0	0
18	5444	1.67697	AGACAGCAGTACAAATGGCAGCAT	2	0.5	0	0.5	0	0	0	0	0	0	0	0.5	0.5	0	0	0	0	0	0	-1	0	0	0	0	0	0
19	5444	1.67697	AGACAGCAGTACCAATGGCAGTAT	1	1	0	0.5	1	0	0	0	0	0	0	0	0.5	0	0	0	0	0	0	-1	0	0	0	0	0	0
20	5444	1.67697	AGACAGCAGTACAAATGGCCGTAT	1	0.5	0	0.5	0	0	0	0	0	0	0	0.5	0.5	0	0	0	0	0	0	-1	0	0	0	0	0	0
21	5444	1.67697	GGACAGCAGTAATCATGGCAGTGT	1	1	0	0	1	0	0	0	0	0	0	0.5	0.5	0	0	0	0	0	0	-1	0	0	0	0	0	0
22	5444	1.67697	CGACAGCAGTACAAATGGCAGTAT	1	1.5	0	0.5	1	0	0	0	0	0	0	0.5	0.5	0	0	0	0	0	0	-1	0	0	0	0	0	0
23	5444	1.67697	TGACAGCAGGACAAATGGCAGTGT	1	1	0	0	1	0	0	0	0	0	0	0.5	0.5	0	0	0	0	0	0	-1	0	0	0	0	0	0
24	5444	1.67697	AGACAGCAGTACAAATGGCAGTAT	804	2.5	0	0.5	1	0	0	0	0	0	0	0.5	0.5	0	0	0	0	0	0	-1	0	0	0	0	0	0
25	5444	1.67697	AGACAGCAGTACAGATGGCAGTGT	3	1	0	0	1	0	0	0	0	0	0	0.5	0.5	0	0	0	0	0	0	-1	0	0	0	0	0	0
26	5444	1.67697	AGACAGCAGTACAAATGGCTGTAT	1	2.5	0	0.5	1	0	0	0	0	0	0	0.5	0.5	0	0	0	0	0	0	-1	0	0	0	0	0	0
27	5444	1.67697	AGACAGCAGTCCAGATGGCAGTAT	1	1.5	0	0.5	1	0	0	0	0	0	0	0.5	0.5	0	0	0	0	0	0	-1	0	0	0	0	0	0
28	5444	1.67697	GGACAGCAGTACAAATGGCAGTAT	15	1.5	0	0.5	1	0	0	0	0	0	0	0.5	0.5	0	0	0	0	0	0	-1	0	0	0	0	0	0
29	5444	1.67697	AGACAGCATTACAAATGGCAGTAT	2	2.5	0	0.5	1	0	0	0	0	0	0	0.5	0.5	0	0	0	0	0	0	-1	0	0	0	0	0	0
30	5444	1.67697	AGAGAGCAGTACAAATGGCAGTAT	1	2.5	0	0.5	1	0	0	0	0	0	0	0.5	0.5	0	0	0	0	0	0	-1	0	0	0	0	0	0
31	5444	1.67697	AGACAGCAGTACAAATGGCGGTAT	6	0.5	0	0.5	0	0	0	0	0	0	0	0.5	0.5	0	0	0	0	0	0	-1	0	0	0	0	0	0
32	5444	1.67697	AGGCAGCAGTACAAATGGCAGTAT	2	1.5	0	0.5	1	0	0	0	0	0	0	0.5	0.5	0	0	0	0	0	0	-1	0	0	0	0	0	0
33	5444	1.67697	AGACAGCAATACAAATGGCAGTAT	1	2.5	0	0.5	1	0	0	0	0	0	0	0.5	0.5	0	0	0	0	0	0	-1	0	0	0	0	0	0
34	5444	1.67697	AGACAGCAGTTCAGATGGCAGTAT	1	1.5	0	0.5	1	0	0	0	0	0	0	0.5	0.5	0	0	0	0	0	0	-1	0	0	0	0	0	0
35	5444	1.67697	AGACAGCAGTACACATGGCAGTAT	1	1.5	0	0.5	1	0	0	0	0	0	0	0.5	0.5	0	0	0	0	0	0	-1	0	0	0	0	0	0
36	5444	1.67697	AGACAGCAGTGCAAATGGCAGTAT	30	0.5	0	0.5	1	0	0	0	0	0	0	0.5	0.5	0	0	0	0	0	0	-1	0	0	0	0	-1	0
37	5444	1.67697	AGACAGCGGTACAGATGGCAGTAT	1	1.5	0	0.5	1	0	0	0	0	0	0	0.5	0.5	0	0	0	0	0	0	-1	0	0	0	0	0	0
38	5444	1.67697	AGACAGCAGTACAAATGGCAGTCT	2	1	0	0	1	0	0	0	0	0	0	0.5	0.5	0	0	0	0	0	0	-1	0	0	0	0	0	0
39	5444	1.67697	AGACAGCAGTAGTAATGGCAGTGC	1	1	0	0	1	0	0	0	0	0	0	0.5	0.5	0	0	0	0	0	0	-1	0	0	0	0	0	0
40	5444	1.67697	AGACAGCAGTTCAAATGGCAGTGT	1	1	0	0	1	0	0	0	0	0	0	0.5	0.5	0	0	0	0	0	0	-1	0	0	0	0	0	0
41	5444	1.67697	AGACGGCAGTACAGATGGCAGTAT	2	2	0	0.5	1	0	0	0	0	0.5	0	0.5	0.5	0	0	0	0	0	0	-1	0	0	0	0	0	0
42	5444	1.67697	AGACAGCAGTGCAAATGGCAGTGT	1	0	0	0	1	0	0	0	0	0	0	0.5	0.5	0	0	0	0	0	0	-1	0	0	0	0	-1	0
43	5444	1.67697	AGACAGCAGTACAACTGGCAGTAT	1	0.5	0	0.5	0	0	0	0	0	0	0	0.5	0.5	0	0	0	0	0	0	-1	0	0	0	0	0	0
44	5444	1.67697	GGACAGCAGTACAAATGGCAGTAC	2	1	0	0	1	0	0	0	0	0	0	0.5	0.5	0	0	0	0	0	0	-1	0	0	0	0	0	0
45	5444	1.67697	AGACAGCGGTACAAATGGCAGTAT	7	1.5	0	0.5	1	0	0	0	0	0	0	0.5	0.5	0	0	0	0	0	0	-1	0	0	0	0	0	0
46	5444	1.67697	AGACGGCAGTACAAATGGCAGTAT	4	2	0	0.5	1	0	0	0	0	0.5	0	0.5	0.5	0	0	0	0	0	0	-1	0	0	0	0	0	0
47	5444	1.67697	AGACAGCTGTACAGATGGCAGTAT	1	1.5	0	0.5	1	0	0	0	0	0	0	0.5	0.5	0	0	0	0	0	0	-1	0	0	0	0	0	0
48	5444	1.67697	AGACAGCAGTTCAAATGGCAGTAT	1	2.5	0	0.5	1	0	0	0	0	0	0	0.5	0.5	0	0	0	0	0	0	-1	0	0	0	0	0	0
49	5444	1.67697	AGACAGCACTACAAATGGCAGTAT	1	2.5	0	0.5	1	0	0	0	0	0	0	0.5	0.5	0	0	0	0	0	0	-1	0	0	0	0	0	0
a MSA	AZT-3TC-ABC
b Size	52
c In_Seqs	44
d No. V	e Win start	f Info_E.	g Sequence	h No. seqs	I Score	1	2	3	4	5	6	7	8	9	10	11	12	13	14	15	16	17	18	19	20	21	22	23	24
1	23	1.72551	TACCAGTATCATTAAAGCCAGGAA	1	1.5	0.5	0.5	0	0	0	0	0	0	0	0.5	0	0	0	0	0	0	0	-1	0	0	0	0	0	0
2	23	1.72551	TGCCAGTAAAATTAAAGCCAGGAA	3	1	0	0.5	0	0	0	0	0	0	0	0.5	0	0	0	0	0	0	0	-1	0	0	0	0	0	0		2572-2595
3	23	1.72551	TACCAGTAAAATTAAAGCCAGGAA	31	1.5	0.5	0.5	0	0	0	0	0	0	0	0.5	0	0	0	0	0	0	0	-1	0	0	0	0	0	0
4	23	1.72551	TACCAGTAACATTAAAGCCAGGAA	1	1.5	0.5	0.5	0	0	0	0	0	0	0	0.5	0	0	0	0	0	0	0	-1	0	0	0	0	0	0
5	23	1.72551	TACCAGTTAAATTAAAGCCAGGAA	1	0.5	0.5	0.5	0	0	0	0	0	0	0	0.5	0	0	0	0	0	0	0	-1	0	0	-1	0	0	0
6	23	1.72551	TACCAGCAAGATTAAAGCCAGGAA	1	1.5	0.5	0.5	0	0	0	0	0	0	0	0.5	0	0	0	0	0	0	0	-1	0	0	0	0	0	0
7	23	1.72551	TACCAGTGAAATTAAAGCCAGGGA	1	1	0.5	0	0	0	0	0	0	0	0	0.5	0	0	0	0	0	0	0	-1	0	0	0	0	0	0
8	23	1.72551	TACCAGTAAGATTAAAACCAGGAA	1	1.5	0.5	0.5	0	0	0	0	0	0	0	0.5	0	0	0	0	0	0	0	-1	0	0	0	0	0	0
9	23	1.72551	TACCAGTAAAATTGAAGCCAGGGA	1	1	0.5	0	0	0	0	0	0	0	0	0.5	0	0	0	0	0	0	0	-1	0	0	0	0	0	0
10	23	1.72551	TACCAGTAAAATTAAAGCCAGGGA	2	1	0.5	0	0	0	0	0	0	0	0	0.5	0	0	0	0	0	0	0	-1	0	0	0	0	0	0
11	23	1.72551	TACCGGTAAAATTAAAGCCAGGAA	1	2	0.5	0.5	0	0	0	0	0	0.5	0	0.5	0	0	0	0	0	0	0	-1	0	0	0	0	0	0
W2 for AZT-3TC-ABC
d No. V	e Win start	f Info_E.	g Sequence	h No. seqs	I Score	1	2	3	4	5	6	7	8	9	10	11	12	13	14	15	16	17	18	19	20	21	22	23	24
1	25	1.52655	CCAGTAAAATTAAAGCCAGGAATG	34	2	0	0	0	0	0	0	1	0	0	0.5	0	0	0	0	0	0	0	0	-0.5	0	0	0	0	0		2574-2597
2	25	1.52655	CCAGTAACATTAAAGCCAGGAATG	1	3	0	0	0	0	0	0	1	0	0	0.5	0	1	0	0	0	0	0	0	-0.5	0	0	0	0	0
3	25	1.52655	CCAGTTAAATTAAAGCCAGGAATG	1	1	0	0	0	0	0	0	1	0	0	0.5	0	0	0	0	0	0	0	0	-0.5	-1	0	0	0	0
4	25	1.52655	CCAGTATCATTAAAGCCAGGAATG	1	3	0	0	0	0	0	0	1	0	0	0.5	0	1	0	0	0	0	0	0	-0.5	0	0	0	0	0
5	25	1.52655	CCAGCAAGATTAAAGCCAGGAATG	1	2	0	0	0	0	0	0	1	0.5	0	0.5	0	0	0	0	0	0	0	0	0	0	0	0	0	0
6	25	1.52655	CCGGTAAAATTAAAGCCAGGAATG	1	2	0	0	0	0	0	0	1	0	0	0.5	0	0	0	0	0	0	0	0	-0.5	0	0	0	0	0
7	25	1.52655	CCAGTAAGATTAAAACCAGGAATG	1	3	0	0	1	0	0	0	1	0	0	0.5	0	0	0	0	0	0	0	0	-0.5	0	0	0	0	0
8	25	1.52655	CCAGTAAAATTAAAGCAAGGAATG	1	3	0	0	1	0	0	0	1	0	0	0.5	0	0	0	0	0	0	0	0	-0.5	0	0	0	0	0
W3 for AZT-3TC-ABC
d No. V	e Win start	f Info_E.	g Sequence	h No. seqs	I Score	1	2	3	4	5	6	7	8	9	10	11	12	13	14	15	16	17	18	19	20	21	22	23	24
1	153	1.77521	GCCTGAAAATCCATACAACACTCC	1	2	0	0	1	1	0	0	0	0.5	0	0.5	0	0	0	0	0	0	0	-1	0	0	0	0	0	0		2702-2725
2	153	1.77521	GCCTGAAAATCCATATAATACTCC	2	6.5	0	0	1	1	1	1	0	0.5	0	0.5	0.5	0	0	0	0	1	0	-1	0	0	0	0	0	0
3	153	1.77521	GCCTGAAAATCCATATAACACTCC	4	4.5	0	0	1	1	1	0	0	0.5	0	0.5	0.5	0	0	0	0	0	0	-1	0	0	0	0	0	0
4	153	1.77521	GCCTGAAAACCCATATAATACTCC	4	7.5	0	0	1	1	1	1	0	0.5	0	0.5	0.5	0	1	0	0	1	0	-1	0	0	0	0	0	0
5	153	1.77521	GCCTGAAAACCCATACAATACTCC	3	5	0	0	1	1	1	0	0	0.5	0	0.5	0	0	1	0	0	1	0	-1	0	0	0	0	0	0
6	153	1.77521	ACCTGAAAATCCATACAATACTCC	1	5	0	0	1	1	1	0	0	0.5	0	0.5	0	0	0	0	0	1	0	-1	0	0	0	0	0	0
7	153	1.77521	GCCTGAGAATCCATACAATACTCC	2	4.5	0	0	1	1	1	0	0	0.5	0.5	0.5	0	0	0	0	0	1	0	-1	0	0	0	0	0	0
8	153	1.77521	GCCTGAAAATCCATACAATACTCC	33	5	0	0	1	1	1	0	0	0.5	0	0.5	0	0	0	0	0	1	0	-1	0	0	0	0	0	0
9	153	1.77521	GCCTGACAATCCATATAACACTCC	1	3.5	0	0	1	1	1	0	0	0.5	0	0.5	0.5	0	0	0	0	0	0	-1	0	0	0	0	0	0
10	153	1.77521	GCCTGAAAATCCGTACAATACTCC	1	3.5	0	0	1	1	1	0	0	0.5	0	0	0	0	0	0	0	1	0	-1	0	0	0	0	0	0
a MSA	D4T-3TC-NVP
b Size	91
c In_Seqs	79
d No. V	e Win start	f Info_E.	g Sequence	h No. seqs	I Score	1	2	3	4	5	6	7	8	9	10	11	12	13	14	15	16	17	18	19	20	21	22	23	24
1	153	1.90434	ACCTGAAAATCCATACAACACTCC	1	3	0	0	1	1	0	0	0	0.5	0	0.5	0	0	0	0	0	0	0	-1	0	0	0	0	0	0		2702-2725
2	153	1.90434	GCCTGAAAATCCATACAACACTCC	3	2	0	0	1	1	0	0	0	0.5	0	0.5	0	0	0	0	0	0	0	-1	0	0	0	0	0	0
3	153	1.90434	GCCTGAAAATCCATATAATACTCC	6	6.5	0	0	1	1	1	1	0	0.5	0	0.5	0.5	0	0	0	0	1	0	-1	0	0	0	0	0	0
4	153	1.90434	GCCTGAAAATCCATATAACACTCC	6	4.5	0	0	1	1	1	0	0	0.5	0	0.5	0.5	0	0	0	0	0	0	-1	0	0	0	0	0	0
5	153	1.90434	GCCTGAAAACCCATATAATACTCC	1	7.5	0	0	1	1	1	1	0	0.5	0	0.5	0.5	0	1	0	0	1	0	-1	0	0	0	0	0	0
6	153	1.90434	GCCTGAAAACCCATACAATACTCC	4	5	0	0	1	1	1	0	0	0.5	0	0.5	0	0	1	0	0	1	0	-1	0	0	0	0	0	0
7	153	1.90434	ACCTGAAAATCCATACAATACTCC	1	5	0	0	1	1	1	0	0	0.5	0	0.5	0	0	0	0	0	1	0	-1	0	0	0	0	0	0
8	153	1.90434	GCCTGAAAATCCATACAATACTCC	52	5	0	0	1	1	1	0	0	0.5	0	0.5	0	0	0	0	0	1	0	-1	0	0	0	0	0	0
9	153	1.90434	GCCTGACAATCCATATAACACTCC	1	3.5	0	0	1	1	1	0	0	0.5	0	0.5	0.5	0	0	0	0	0	0	-1	0	0	0	0	0	0
10	153	1.90434	GCCTGAAAATCCCTATAATACTCC	1	6	0	0	1	1	1	1	0	0.5	0	0	0.5	0	0	0	0	1	0	-1	0	0	0	0	0	0
11	153	1.90434	GCCTGAAAACCCATACAACACTCC	1	3	0	0	1	1	0	0	0	0.5	0	0.5	0	0	1	0	0	0	0	-1	0	0	0	0	0	0
12	153	1.90434	GCCTGAAAACCCATATAACACGCC	1	1.5	0	0	0	0	0	0	0	0.5	0	0.5	0.5	0	1	0	0	0	0	-1	0	0	0	0	0	0
13	153	1.90434	GCCTGAAAATCCATATAATACACC	1	6.5	0	0	1	1	1	1	0	0.5	0	0.5	0.5	0	0	0	0	1	0	-1	0	0	0	0	0	0
14	153	1.90434	GCCTGAAAATCCTTACAATACACC	1	5	0	0	1	1	1	0	0	0.5	0	0.5	0	0	0	0	0	1	0	-1	0	0	0	0	0	0
a MSA	ZDV-3TC-EFV
b Size	1381
c In_Seqs	1185	1201	1348
d No. V	e Win start	f Info_E.	g Sequence	h No. seqs	I Score	1	2	3	4	5	6	7	8	9	10	11	12	13	14	15	16	17	18	19	20	21	22	23	24
1	7	1.2703	AGTCCTATTGAACCTGTACCAGTA	5	2	0	0.5	0	0	0	0	1	0.5	0	0	0	0	0	0	0	0	0	0	0	-1	0	0	0	0
2	7	1.2703	AGTCCTATTGAAACTGTACCAGCA	4	2	0	0	0	0	0	0	1	0.5	0	0.5	0	0	0	0	0	0	0	0	0	-1	0	0	0	0
3	7	1.2703	AGTCCTATTGACACTGTACCAGTA	8	2.5	0	0.5	0	0	0	0	1	0.5	0	0.5	0	0	0	0	0	0	0	0	0	-1	0	0	0	0
4	7	1.2703	AGTCCTATTGAAACTGTGCCAGTA	21	2.5	0	0.5	0	0	0	0	1	0.5	0	0.5	0	0	0	0	0	0	0	0	0	-1	0	0	0	0
5	7	1.2703	AGTCCTATTGAAACTGTACCAGTA	1013	2.5	0	0.5	0	0	0	0	1	0.5	0	0.5	0	0	0	0	0	0	0	0	0	-1	0	0	0	0
6	7	1.2703	AGTCCTATCGAAACTGTACCAGTA	6	2.5	0	0.5	0	0	0	0	1	0.5	0	0.5	0	0	0	0	0	0	0	0	0	-1	0	0	0	0
7	7	1.2703	AGTCCTATTGATACTGTACCAGTA	3	2.5	0	0.5	0	0	0	0	1	0.5	0	0.5	0	0	0	0	0	0	0	0	0	-1	0	0	0	0
8	7	1.2703	AGTCCTATTGAAACTGCACCAGTA	1	2.5	0	0.5	0	0	0	0	1	0.5	0	0.5	0	0	0	0	0	0	0	0	0	-1	0	0	0	0
9	7	1.2703	AGTCCTATTGAAATTGTACCAGTA	1	2.5	0	0.5	0	0	0	0	1	0.5	0	0.5	0	0	0	0	0	0	0	0	0	-1	0	0	0	0
10	7	1.2703	AGTCCTGTTGAAACTGTACCAGTA	2	4	0	0.5	0	0	0	0	1	0.5	0.5	0.5	0	0	0	0	0	0	0	0	0	0	0	0	0	0
11	7	1.2703	AGTCCTATTGAAACAGTACCAGTA	4	2.5	0	0.5	0	0	0	0	1	0.5	0	0.5	0	0	0	0	0	0	0	0	0	-1	0	0	0	0
12	7	1.2703	AGTCCTATCGAGACTGTACCAGTA	2	1.5	0	0.5	0	0	0	0	1	0.5	0	0.5	0	0	0	0	0	0	0	0	0	-1	0	0	0	0
13	7	1.2703	AGTCCTATTGACACTGTGCCAGTA	1	1.5	0	0.5	0	0	0	0	1	0.5	0	0.5	0	0	0	0	0	0	0	0	0	-1	0	0	0	0
14	7	1.2703	AGTCCAATTGAGACGGTACCAGTA	1	2.5	0	0.5	0	0	0	0	1	0.5	0	0.5	0	0	0	0	0	0	0	0	0	0	0	0	0	0
15	7	1.2703	AGTCCTATTGACACTGTACCAGCA	1	1	0	0	0	0	0	0	1	0.5	0	0.5	0	0	0	0	0	0	0	0	0	-1	0	0	0	0
16	7	1.2703	AGTCCTATTGAAACCGTACCAGTA	5	2.5	0	0.5	0	0	0	0	1	0.5	0	0.5	0	0	0	0	0	0	0	0	0	-1	0	0	0	0
17	7	1.2703	AGTCCTATTGAAGCTGTACCAGTA	8	2	0	0.5	0	0	0	0	1	0.5	0	0	0	0	0	0	0	0	0	0	0	-1	0	0	0	0
18	7	1.2703	AGTCCTATTGAAACTGTACCTGTA	14	2.5	0	0.5	0	0	0	0	1	0.5	0	0.5	0	0	0	0	0	0	0	0	0	-1	0	0	0	0
19	7	1.2703	AGTCCTATTGAGACTGTGCCAGTA	4	1.5	0	0.5	0	0	0	0	1	0.5	0	0.5	0	0	0	0	0	0	0	0	0	-1	0	0	0	0
20	7	1.2703	AGTCCTATTGAAACGGTACCAGTA	1	2.5	0	0.5	0	0	0	0	1	0.5	0	0.5	0	0	0	0	0	0	0	0	0	-1	0	0	0	0
21	7	1.2703	AGTCCTATTGAGACTGTACCAGTG	3	1	0	0	0	0	0	0	1	0.5	0	0.5	0	0	0	0	0	0	0	0	0	-1	0	0	0	0
22	7	1.2703	AGTCCTATTGAAACTGTACCCGTA	8	0.5	0	0.5	0	0	0	0	0	0.5	0	0.5	0	0	0	0	0	0	0	-1	0	-1	0	0	0	0
23	7	1.2703	ACTCCTATTGAAACTGTACCAGTA	1	2.5	0	0.5	0	0	0	0	1	0.5	0	0.5	0	0	0	0	0	0	0	0	0	-1	0	0	0	0
24	7	1.2703	AGTCCTATTGAAACTGTACCGGTA	6	0.5	0	0.5	0	0	0	0	0	0.5	0	0.5	0	0	0	0	0	0	0	-1	0	-1	0	0	0	0
25	7	1.2703	AGTCCGATTGAAACTGTACCAGTA	1	3.5	0	0.5	0	0	0	0	1	0.5	0	0.5	0	0	0	0	0	0	0	0	0	0	0	0	0	0
26	7	1.2703	AGTCCTATTAAAACTGTACCAGTA	11	2.5	0	0.5	0	0	0	0	1	0.5	0	0.5	0	0	0	0	0	0	0	0	0	-1	0	0	0	0
27	7	1.2703	AGTCCTATTGAAACTGTACCAGTG	6	2	0	0	0	0	0	0	1	0.5	0	0.5	0	0	0	0	0	0	0	0	0	-1	0	0	0	0
28	7	1.2703	AGTCCTACTGAAACTGTACCAGTA	1	2.5	0	0.5	0	0	0	0	1	0.5	0	0.5	0	0	0	0	0	0	0	0	0	-1	0	0	0	0
29	7	1.2703	AGTCCTATTGGAACTGTACCAGTA	5	1.5	0	0.5	0	0	0	0	1	0.5	0	0.5	0	0	0	0	0	0	0	0	0	-1	0	-1	0	0
30	7	1.2703	AGTCCTATTGCAACTGTACCAGTA	1	2.5	0	0.5	0	0	0	0	1	0.5	0	0.5	0	0	0	0	0	0	0	0	0	-1	0	0	0	0
31	7	1.2703	AGTCCTATTGAAACTGTGCCAGTG	13	1	0	0	0	0	0	0	1	0.5	0	0.5	0	0	0	0	0	0	0	0	0	-1	0	0	0	0
32	7	1.2703	GGTCCTATTGAAACTGTACCAGTA	1	2.5	0	0.5	0	0	0	0	1	0.5	0	0.5	0	0	0	0	0	0	0	0	0	-1	0	0	0	0
33	7	1.2703	GGTCCTATTGAGACTGTACCAGTA	2	1.5	0	0.5	0	0	0	0	1	0.5	0	0.5	0	0	0	0	0	0	0	0	0	-1	0	0	0	0
34	7	1.2703	AGCTCTATTGAAACTGTACCAGCA	1	2	0	0	0	0	0	0	1	0.5	0	0.5	0	0	0	0	0	0	0	0	0	-1	0	0	0	0
35	7	1.2703	AGTCCTATTGAGACTGTACCAGTA	51	2.5	0	0.5	0	0	0	0	1	0.5	0	0.5	0	0	0	0	0	0	0	0	0	-1	0	0	0	0
36	7	1.2703	AGTCCTATTGAAACTGTACCAGTT	1	2.5	0	0.5	0	0	0	0	1	0.5	0	0.5	0	0	0	0	0	0	0	0	0	-1	0	0	0	0
37	7	1.2703	AGTCCTATTGAAACAGTACCAGTG	13	2	0	0	0	0	0	0	1	0.5	0	0.5	0	0	0	0	0	0	0	0	0	-1	0	0	0	0
W2 for ZDV-3TC-EFV
d No. V	e Win start	f Info_E.	g Sequence	h No. seqs	I Score	1	2	3	4	5	6	7	8	9	10	11	12	13	14	15	16	17	18	19	20	21	22	23	24
1	23	1.63581	TGCCAGTAAAATTAAAGCCAGGAA	17	1	0	0.5	0	0	0	0	0	0	0	0.5	0	0	0	0	0	0	0	-1	0	0	0	0	0	0		2572-2595
2	23	1.63581	TACCGGTAAAATTAAAGCCAGGGA	1	1.5	0.5	0	0	0	0	0	0	0.5	0	0.5	0	0	0	0	0	0	0	-1	0	0	0	0	0	0
3	23	1.63581	TACCAGTAAAATTGAAACCGGGAA	1	1.5	0.5	0.5	0	0	0	0	0	0	0	0.5	0	0	0	0	0	0	0	-1	0	0	0	0	0	0
4	23	1.63581	TACCGGTGAAATTAAAGCCAGGAA	8	2	0.5	0.5	0	0	0	0	0	0.5	0	0.5	0	0	0	0	0	0	0	-1	0	0	0	0	0	0
5	23	1.63581	TACCAGTAAAATTAAAGCCAGGCA	1	1	0.5	0	0	0	0	0	0	0	0	0.5	0	0	0	0	0	0	0	-1	0	0	0	0	0	0
6	23	1.63581	TACCAGTAAAATTAGAGCCAGGAA	2	2.5	0.5	0.5	0	0	0	0	0	0	0	0.5	0	0	0	0	1	0	0	-1	0	0	0	0	0	0
7	23	1.63581	TACCAGTGAAATTAAAACCAGGAA	1	1.5	0.5	0.5	0	0	0	0	0	0	0	0.5	0	0	0	0	0	0	0	-1	0	0	0	0	0	0
8	23	1.63581	TACCAGCAAGATTAAAACCAGGTA	1	1.5	0.5	0.5	0	0	0	0	0	0	0	0.5	0	0	0	0	0	0	0	-1	0	0	0	0	0	0
9	23	1.63581	TGCCAGTAAAATTAAAGCCAGGTA	4	1	0	0.5	0	0	0	0	0	0	0	0.5	0	0	0	0	0	0	0	-1	0	0	0	0	0	0
10	23	1.63581	TACCAGTAAAATTAAAGCCAGGTA	9	1.5	0.5	0.5	0	0	0	0	0	0	0	0.5	0	0	0	0	0	0	0	-1	0	0	0	0	0	0
11	23	1.63581	TACCAGTAAAATTGAGGCCAGGAA	3	1.5	0.5	0.5	0	0	0	0	0	0	0	0.5	0	0	0	0	0	0	0	-1	0	0	0	0	0	0
12	23	1.63581	TACCAGTGAAATTGAAACCAGGAA	1	1.5	0.5	0.5	0	0	0	0	0	0	0	0.5	0	0	0	0	0	0	0	-1	0	0	0	0	0	0
13	23	1.63581	TACCAGTAAGACTAAAACCAGGAA	13	1.5	0.5	0.5	0	0	0	0	0	0	0	0.5	0	0	0	0	0	0	0	-1	0	0	0	0	0	0
14	23	1.63581	TACCAGTAAAATTAAAGCCAGGAA	907	1.5	0.5	0.5	0	0	0	0	0	0	0	0.5	0	0	0	0	0	0	0	-1	0	0	0	0	0	0
15	23	1.63581	TGCCAGTACAATTAAAGCCAGGAA	2	1	0	0.5	0	0	0	0	0	0	0	0.5	0	0	0	0	0	0	0	-1	0	0	0	0	0	0
16	23	1.63581	TACCAGTAAAACTAAAGCCAGGAA	3	1.5	0.5	0.5	0	0	0	0	0	0	0	0.5	0	0	0	0	0	0	0	-1	0	0	0	0	0	0
17	23	1.63581	CACCAGTAAAATTAAAGCCAGGAA	1	1	0	0.5	0	0	0	0	0	0	0	0.5	0	0	0	0	0	0	0	-1	0	0	0	0	0	0
18	23	1.63581	TACCAGTAAAATTGAAACCAGGAA	15	1.5	0.5	0.5	0	0	0	0	0	0	0	0.5	0	0	0	0	0	0	0	-1	0	0	0	0	0	0
19	23	1.63581	TACCAGTAAAATTGAAGCCAGGGA	2	1	0.5	0	0	0	0	0	0	0	0	0.5	0	0	0	0	0	0	0	-1	0	0	0	0	0	0
20	23	1.63581	TGCCAGTAAAATTAAAGCCAGGGA	1	0.5	0	0	0	0	0	0	0	0	0	0.5	0	0	0	0	0	0	0	-1	0	0	0	0	0	0
21	23	1.63581	TACCAGTAAGACTAAAACCAGGAG	1	1	0.5	0	0	0	0	0	0	0	0	0.5	0	0	0	0	0	0	0	-1	0	0	0	0	0	0
22	23	1.63581	TACCAGTAACATTAAAGCCAGGAA	2	1.5	0.5	0.5	0	0	0	0	0	0	0	0.5	0	0	0	0	0	0	0	-1	0	0	0	0	0	0
23	23	1.63581	TACCAGTTAAATTAAAGCCAGGAA	1	0.5	0.5	0.5	0	0	0	0	0	0	0	0.5	0	0	0	0	0	0	0	-1	0	0	-1	0	0	0
24	23	1.63581	TACCAGTGAAATTAAAGCCAGGGA	1	1	0.5	0	0	0	0	0	0	0	0	0.5	0	0	0	0	0	0	0	-1	0	0	0	0	0	0
25	23	1.63581	TACCAGTAAGATTAAAACCAGGAA	2	1.5	0.5	0.5	0	0	0	0	0	0	0	0.5	0	0	0	0	0	0	0	-1	0	0	0	0	0	0
26	23	1.63581	TACCAGCAAAATTAAAGCCAGGAA	7	1.5	0.5	0.5	0	0	0	0	0	0	0	0.5	0	0	0	0	0	0	0	-1	0	0	0	0	0	0
27	23	1.63581	TACCAGTAAGATTAAAGCCAGGAA	9	1.5	0.5	0.5	0	0	0	0	0	0	0	0.5	0	0	0	0	0	0	0	-1	0	0	0	0	0	0
28	23	1.63581	TACCAGTAAGACTAAAACCCGGAA	2	1.5	0.5	0.5	0	0	0	0	0	0	0	0.5	0	0	0	0	0	0	0	-1	0	0	0	0	0	0
29	23	1.63581	TACCAGTAAGATTAAAGCCAGGGA	1	1	0.5	0	0	0	0	0	0	0	0	0.5	0	0	0	0	0	0	0	-1	0	0	0	0	0	0
30	23	1.63581	TACCAGCAAAATTAAAGCCAGGTA	6	1.5	0.5	0.5	0	0	0	0	0	0	0	0.5	0	0	0	0	0	0	0	-1	0	0	0	0	0	0
31	23	1.63581	TACCAGTAAAGTTAAAGCCAGGAA	17	1.5	0.5	0.5	0	0	0	0	0	0	0	0.5	0	0	0	0	0	0	0	-1	0	0	0	0	0	0
32	23	1.63581	TACCAGTAAAACTAAAACCAGGAA	2	1.5	0.5	0.5	0	0	0	0	0	0	0	0.5	0	0	0	0	0	0	0	-1	0	0	0	0	0	0
33	23	1.63581	TACCAGTGAAGTTAAAGCCAGGAA	1	1.5	0.5	0.5	0	0	0	0	0	0	0	0.5	0	0	0	0	0	0	0	-1	0	0	0	0	0	0
34	23	1.63581	TACCAGTAAAATTAAGGCCAGGAA	7	1.5	0.5	0.5	0	0	0	0	0	0	0	0.5	0	0	0	0	0	0	0	-1	0	0	0	0	0	0
35	23	1.63581	TACCTGTAAAATTAAAGCCAGGAA	14	1	0.5	0.5	0	0	0	0	0	0	0	0.5	0	0	0	0	0	0	0	-1	-0.5	0	0	0	0	0
36	23	1.63581	TGCCAGTGAGATTAAAGCCAGGAA	5	0	0	0.5	0	0	0	0	0	0	0	0.5	0	0	0	0	0	0	0	-1	0	0	0	0	0	0
37	23	1.63581	TACCAGTAAAACTAGAGCCAGGAA	1	2.5	0.5	0.5	0	0	0	0	0	0	0	0.5	0	0	0	0	1	0	0	-1	0	0	0	0	0	0
38	23	1.63581	TACCGGTAAAATTAAAGCCAGGAA	4	2	0.5	0.5	0	0	0	0	0	0.5	0	0.5	0	0	0	0	0	0	0	-1	0	0	0	0	0	0
39	23	1.63581	TACCAGTAGAATTAAAGCCAGGAA	1	1.5	0.5	0.5	0	0	0	0	0	0	0	0.5	0	0	0	0	0	0	0	-1	0	0	0	0	0	0
40	23	1.63581	TACCAGTAAAGTTAAAACCAGGAA	3	1.5	0.5	0.5	0	0	0	0	0	0	0	0.5	0	0	0	0	0	0	0	-1	0	0	0	0	0	0
41	23	1.63581	TACCAGTAAAATTGAAGCCAGGAA	44	1.5	0.5	0.5	0	0	0	0	0	0	0	0.5	0	0	0	0	0	0	0	-1	0	0	0	0	0	0
42	23	1.63581	TACCAGCAAAATTAAAACCAGGAA	1	1.5	0.5	0.5	0	0	0	0	0	0	0	0.5	0	0	0	0	0	0	0	-1	0	0	0	0	0	0
43	23	1.63581	TGCCAGTGAAATTAAAGCCAGGAA	8	1	0	0.5	0	0	0	0	0	0	0	0.5	0	0	0	0	0	0	0	-1	0	0	0	0	0	0
44	23	1.63581	TGCCAGTAAAATTAAAGCCGGGAA	1	1	0	0.5	0	0	0	0	0	0	0	0.5	0	0	0	0	0	0	0	-1	0	0	0	0	0	0
45	23	1.63581	TACCAGTGAAATTAAAGCCAGGAA	19	1.5	0.5	0.5	0	0	0	0	0	0	0	0.5	0	0	0	0	0	0	0	-1	0	0	0	0	0	0
46	23	1.63581	TACCAGTAAAATTAAAGCCAGGAC	2	1	0.5	0	0	0	0	0	0	0	0	0.5	0	0	0	0	0	0	0	-1	0	0	0	0	0	0
47	23	1.63581	TACCAGTAAAATTAAAGCCAGGAG	11	1	0.5	0	0	0	0	0	0	0	0	0.5	0	0	0	0	0	0	0	-1	0	0	0	0	0	0
48	23	1.63581	TACCAGTAAAATTAAAGCCAGGGA	23	1	0.5	0	0	0	0	0	0	0	0	0.5	0	0	0	0	0	0	0	-1	0	0	0	0	0	0
49	23	1.63581	TACCAGTAAAATCAAAGCCAGGAA	1	1	0.5	0.5	0	0	0	0	0	0	0	0	0	0	0	0	0	0	0	-1	0	0	0	0	0	0
50	23	1.63581	TGCCAGTAAAATTGAAGCCAGGAA	4	1	0	0.5	0	0	0	0	0	0	0	0.5	0	0	0	0	0	0	0	-1	0	0	0	0	0	0
51	23	1.63581	CACCGGTGAAATTAAAGCCAGGAA	1	0.5	0	0.5	0	0	0	0	0	0.5	0	0.5	0	0	0	0	0	0	0	-1	0	0	0	0	0	0
52	23	1.63581	TACCAGTAAAATTAAAGCCGGGAA	1	1.5	0.5	0.5	0	0	0	0	0	0	0	0.5	0	0	0	0	0	0	0	-1	0	0	0	0	0	0
W3 for ZDV-3TC-EFV
d No. V	e Win start	f Info_E.	g Sequence	h No. seqs	I Score	1	2	3	4	5	6	7	8	9	10	11	12	13	14	15	16	17	18	19	20	21	22	23	24
1	24	1.62732	ACCGGTGAAATTAAAGCCAGGAAT	9	2	0	0.5	0	0	0	0	0	0.5	0.5	0.5	0	0	0	0	0	0	0	-1	0	0	0	0	0	0		2753-2796
2	24	1.62732	ACCAGTAAAATTAAAGCCAGGTAT	9	0.5	0	0.5	0	0	0	0	0	0.5	0	0.5	0	0	0	0	0	0	0	-1	0	-1	0	0	0	0
3	24	1.62732	ACCAGCAAGATTAAAACCAGGTAT	1	2.5	0	0.5	1	0	0	0	0	0.5	0	0.5	0	0	0	0	0	0	0	-1	0	0	0	0	0	0
4	24	1.62732	ACCAGTAAAATTGAAACCAGGAAT	15	2	0	0.5	1	0	0	0	0	0.5	0	0	0	0	0	1	0	0	0	-1	0	-1	0	0	0	0
5	24	1.62732	GCCAGTAAAATTAAAGCCAGGTAT	4	0.5	0	0.5	0	0	0	0	0	0.5	0	0.5	0	0	0	0	0	0	0	-1	0	-1	0	0	0	0
6	24	1.62732	ACCAGTAAAATTAAAGCCAGGAAT	908	0.5	0	0.5	0	0	0	0	0	0.5	0	0.5	0	0	0	0	0	0	0	-1	0	-1	0	0	0	0
7	24	1.62732	ACCTGTAAAATTAAAGCCAGGAAT	14	0.5	0	0.5	0	0	0	0	0	0.5	0	0.5	0	0	0	0	0	0	0	-1	0	-1	0	0	0	0
8	24	1.62732	GCCAGTGAGATTAAAGCCAGGAAT	5	1	0	0.5	0	0	0	0	0	0.5	0.5	0.5	0	0	0	0	0	0	0	-1	0	0	0	0	0	0
9	24	1.62732	GCCAGTGAAATTAAAGCCAGGAAT	8	2	0	0.5	0	0	0	0	0	0.5	0.5	0.5	0	0	0	0	0	0	0	-1	0	0	0	0	0	0
10	24	1.62732	ACCAGTAAAATTAAAGCCAGGCAT	1	0.5	0	0.5	0	0	0	0	0	0.5	0	0.5	0	0	0	0	0	0	0	-1	0	-1	0	0	0	0
11	24	1.62732	ACCAGTTAAATTAAAGCCAGGAAT	1	1.5	0	0.5	0	0	0	0	0	0.5	0	0.5	0	0	0	0	0	0	0	-1	0	0	0	0	0	0
12	24	1.62732	GCCAGTAAAATTGAAGCCAGGAAT	4	1	0	0.5	0	0	0	0	0	0.5	0	0	0	0	0	1	0	0	0	-1	0	-1	0	0	0	0
13	24	1.62732	GCCAGTACAATTAAAGCCAGGAAT	2	1.5	0	0.5	0	0	0	0	0	0.5	0	0.5	0	1	0	0	0	0	0	-1	0	-1	0	0	0	0
14	24	1.62732	ACCAGTGAAATTAAAACCAGGAAT	1	3	0	0.5	1	0	0	0	0	0.5	0.5	0.5	0	0	0	0	0	0	0	-1	0	0	0	0	0	0
15	24	1.62732	ACCAGTAAAATTAAAGCCAGGAGT	11	0	0	0	0	0	0	0	0	0.5	0	0.5	0	0	0	0	0	0	0	-1	0	-1	0	0	0	0
16	24	1.62732	ACCAGTAAAATCAAAGCCAGGAAT	1	0.5	0	0.5	0	0	0	0	0	0.5	0	0.5	0	0	0	0	0	0	0	-1	0	-1	0	0	0	0
17	24	1.62732	ACCAGTGAAATTAAAGCCAGGAAT	19	2	0	0.5	0	0	0	0	0	0.5	0.5	0.5	0	0	0	0	0	0	0	-1	0	0	0	0	0	0
18	24	1.62732	ACCAGTAAAGTTAAAGCCAGGAAT	17	0.5	0	0.5	0	0	0	0	0	0.5	0	0.5	0	0	0	0	0	0	0	-1	0	-1	0	0	0	0
19	24	1.62732	ACCAGTAAAACTAGAGCCAGGAAT	1	0.5	0	0.5	0	0	0	0	0	0.5	0	0.5	0	0	0	0	0	0	0	-1	0	-1	0	0	0	0
20	24	1.62732	ACCAGTAGAATTAAAGCCAGGAAT	1	0.5	0	0.5	0	0	0	0	0	0.5	0	0.5	0	0	0	0	0	0	0	-1	0	-1	0	0	0	0
21	24	1.62732	ACCAGTAAGACTAAAACCAGGAGT	1	1	0	0	1	0	0	0	0	0.5	0	0.5	0	0	0	0	0	0	0	-1	0	-1	0	0	0	0
22	24	1.62732	ACCAGTAAAATTAGAGCCAGGAAT	2	0.5	0	0.5	0	0	0	0	0	0.5	0	0.5	0	0	0	0	0	0	0	-1	0	-1	0	0	0	0
23	24	1.62732	ACCGGTAAAATTAAAGCCAGGAAT	4	0.5	0	0.5	0	0	0	0	0	0.5	0	0.5	0	0	0	0	0	0	0	-1	0	-1	0	0	0	0
24	24	1.62732	ACCAGTAAAGTTAAAACCAGGAAT	3	1.5	0	0.5	1	0	0	0	0	0.5	0	0.5	0	0	0	0	0	0	0	-1	0	-1	0	0	0	0
25	24	1.62732	ACCAGTGAAATTGAAACCAGGAAT	1	3.5	0	0.5	1	0	0	0	0	0.5	0.5	0	0	0	0	1	0	0	0	-1	0	0	0	0	0	0
26	24	1.62732	ACCAGTAAAATTGAGGCCAGGAAT	3	1	0	0.5	0	0	0	0	0	0.5	0	0	0	0	0	1	0	0	0	-1	0	-1	0	0	0	0
27	24	1.62732	ACCAGTAAGGCTAAAACCAGGAAT	1	1.5	0	0.5	1	0	0	0	0	0.5	0	0.5	0	0	0	0	0	0	0	-1	0	-1	0	0	0	0
28	24	1.62732	ACCAGCAAAATTAAAACCAGGAAT	1	2.5	0	0.5	1	0	0	0	0	0.5	0	0.5	0	0	0	0	0	0	0	-1	0	0	0	0	0	0
29	24	1.62732	ACCAGTGAAGTTAAAGCCAGGAAT	1	2	0	0.5	0	0	0	0	0	0.5	0.5	0.5	0	0	0	0	0	0	0	-1	0	0	0	0	0	0
30	24	1.62732	ACCAGTAAAACTAAAGCCAGGAAT	3	0.5	0	0.5	0	0	0	0	0	0.5	0	0.5	0	0	0	0	0	0	0	-1	0	-1	0	0	0	0
31	24	1.62732	ACCAGTAAAATTAAGGCCAGGAAT	7	0.5	0	0.5	0	0	0	0	0	0.5	0	0.5	0	0	0	0	0	0	0	-1	0	-1	0	0	0	0
32	24	1.62732	ACCAGTAAAATTAAAGCCAGGACT	2	0	0	0	0	0	0	0	0	0.5	0	0.5	0	0	0	0	0	0	0	-1	0	-1	0	0	0	0
33	24	1.62732	ACCAGTAAAACTAAAACCAGGAAT	2	1.5	0	0.5	1	0	0	0	0	0.5	0	0.5	0	0	0	0	0	0	0	-1	0	-1	0	0	0	0
34	24	1.62732	ACCAGTAACATTAAAGCCAGGAAT	2	0.5	0	0.5	0	0	0	0	0	0.5	0	0.5	0	0	0	0	0	0	0	-1	0	-1	0	0	0	0
35	24	1.62732	ACCAGCAAAATTAAAGCCAGGTAT	6	1.5	0	0.5	0	0	0	0	0	0.5	0	0.5	0	0	0	0	0	0	0	-1	0	0	0	0	0	0
36	24	1.62732	GCCAGTAAAATTAAAGCCAGGAAT	17	0.5	0	0.5	0	0	0	0	0	0.5	0	0.5	0	0	0	0	0	0	0	-1	0	-1	0	0	0	0
37	24	1.62732	ACCAGTAAAATTGAAGCCAGGAAT	44	1	0	0.5	0	0	0	0	0	0.5	0	0	0	0	0	1	0	0	0	-1	0	-1	0	0	0	0
38	24	1.62732	ACCAGTAAGATTAAAACCAGGAAT	2	1.5	0	0.5	1	0	0	0	0	0.5	0	0.5	0	0	0	0	0	0	0	-1	0	-1	0	0	0	0
39	24	1.62732	ACCAGTAAGACTAAAACCAGGAAT	13	1.5	0	0.5	1	0	0	0	0	0.5	0	0.5	0	0	0	0	0	0	0	-1	0	-1	0	0	0	0
40	24	1.62732	ACCAGCAAAATTAAAGCCAGGAAT	7	1.5	0	0.5	0	0	0	0	0	0.5	0	0.5	0	0	0	0	0	0	0	-1	0	0	0	0	0	0
41	24	1.62732	ACCAGTAAGATTAAAGCCAGGAAT	9	0.5	0	0.5	0	0	0	0	0	0.5	0	0.5	0	0	0	0	0	0	0	-1	0	-1	0	0	0	0
42	24	1.62732	ACCAGTAAGACTAAAACCCGGAAT	2	0.5	0	0.5	0	0	0	0	0	0.5	0	0.5	0	0	0	0	0	0	0	-1	0	-1	0	0	0	0
W4 for ZDV-3TC-EFV
d No. V	e Win start	f Info_E.	g Sequence	h No. seqs	I Score	1	2	3	4	5	6	7	8	9	10	11	12	13	14	15	16	17	18	19	20	21	22	23	24
1	25	1.51836	CCAGTAAAGTTAAAACCAGGAATG	3	3	0	0	1	0	0	0	1	0	0	0.5	0	0	0	0	0	0	0	0	-0.5	0	0	0	0	0		2574-2597
2	25	1.51836	CCAGTAACATTAAAGCCAGGAATG	2	3	0	0	0	0	0	0	1	0	0	0.5	0	1	0	0	0	0	0	0	-0.5	0	0	0	0	0
3	25	1.51836	CCAGTAAGACTAAAACCAGGAATG	13	3	0	0	1	0	0	0	1	0	0	0.5	0	0	0	0	0	0	0	0	-0.5	0	0	0	0	0
4	25	1.51836	CCAGTAAAATTAGAGCCAGGAATG	2	1.5	0	0	0	0	0	0	1	0	0	0	0	0	0	0	0	0	0	0	-0.5	0	0	0	0	0
5	25	1.51836	CCAGCAAAATTAAAGCCAGGAATG	7	3	0	0	0	0	0	0	1	0.5	0	0.5	0	0	0	0	0	0	0	0	0	0	0	0	0	0
6	25	1.51836	CCAGTGAAGTTAAAGCCAGGAATG	1	1	0	0	0	0	0	0	1	0	0	0.5	0	0	0	0	0	0	0	0	-0.5	0	0	0	0	0
7	25	1.51836	CCAGTAAGATTAAAGCCAGGAATG	9	2	0	0	0	0	0	0	1	0	0	0.5	0	0	0	0	0	0	0	0	-0.5	0	0	0	0	0
8	25	1.51836	CCGGTGAAATTAAAGCCAGGAATG	9	1	0	0	0	0	0	0	1	0	0	0.5	0	0	0	0	0	0	0	0	-0.5	0	0	0	0	0
9	25	1.51836	CCAGCAAGATTAAAACCAGGTATG	1	4	0	0	1	0	0	0	1	0.5	0	0.5	0	0	0	0	0	0	0	0	0	0	0	0	0	0
10	25	1.51836	CCAGTAAAATTAAAACCAGGAATG	60	3	0	0	1	0	0	0	1	0	0	0.5	0	0	0	0	0	0	0	0	-0.5	0	0	0	0	0
11	25	1.51836	CCAGTAAGGCTAAAACCAGGAATG	1	2	0	0	1	0	0	0	1	0	0	0.5	0	0	0	0	0	0	0	0	-0.5	0	0	0	0	0
12	25	1.51836	CCAGTAAAATTAAAGCCAGGCATG	1	0	0	0	0	0	0	0	0	0	0	0.5	0	0	0	0	0	0	0	-1	-0.5	0	0	0	0	0
13	25	1.51836	CCAGTAAGACTAAAACCCGGAATG	2	1	0	0	0	0	0	0	1	0	0	0.5	0	0	0	0	0	0	0	0	-0.5	0	0	0	0	0
14	25	1.51836	CCAGTAAGATTAAAACCAGGAATG	2	3	0	0	1	0	0	0	1	0	0	0.5	0	0	0	0	0	0	0	0	-0.5	0	0	0	0	0
15	25	1.51836	CCAGTAAAATTAAAGCCAGGAATG	926	2	0	0	0	0	0	0	1	0	0	0.5	0	0	0	0	0	0	0	0	-0.5	0	0	0	0	0
16	25	1.51836	CCAGTAGAATTAAAGCCAGGAATG	1	2.5	0	0	0	0	0	0	1	0	0.5	0.5	0	0	0	0	0	0	0	0	-0.5	0	0	0	0	0
17	25	1.51836	CCAGTTAAATTAAAGCCAGGAATG	1	1	0	0	0	0	0	0	1	0	0	0.5	0	0	0	0	0	0	0	0	-0.5	-1	0	0	0	0
18	25	1.51836	CCAGTAAAATTAAAGCCAGGTATG	13	2	0	0	0	0	0	0	1	0	0	0.5	0	0	0	0	0	0	0	0	-0.5	0	0	0	0	0
19	25	1.51836	CCAGTGAAATTAAAGCCAGGAATG	27	2	0	0	0	0	0	0	1	0	0	0.5	0	0	0	0	0	0	0	0	-0.5	0	0	0	0	0
20	25	1.51836	CCAGTAAAATTAAAGCTAGGAATG	1	3	0	0	1	0	0	0	1	0	0	0.5	0	0	0	0	0	0	0	0	-0.5	0	0	0	0	0
21	25	1.51836	CCAGCAAAATTAAAACCAGGAATG	1	4	0	0	1	0	0	0	1	0.5	0	0.5	0	0	0	0	0	0	0	0	0	0	0	0	0	0
22	25	1.51836	CCAGTGAAATTAAAACCAGGAATG	1	3	0	0	1	0	0	0	1	0	0	0.5	0	0	0	0	0	0	0	0	-0.5	0	0	0	0	0
23	25	1.51836	CCGGTAAAATTAAAGCCAGGAATG	4	2	0	0	0	0	0	0	1	0	0	0.5	0	0	0	0	0	0	0	0	-0.5	0	0	0	0	0
24	25	1.51836	CCAGTAAAATTGAAACCAGGAATG	15	3	0	0	1	0	0	0	1	0	0	0.5	0	0	0	0	0	0	0	0	-0.5	0	0	0	0	0
25	25	1.51836	CCAGTGAAATTGAAACCAGGAATG	1	3	0	0	1	0	0	0	1	0	0	0.5	0	0	0	0	0	0	0	0	-0.5	0	0	0	0	0
26	25	1.51836	CCAGTAAAATCAAAGCCAGGAATG	1	2	0	0	0	0	0	0	1	0	0	0.5	0	0	0	0	0	0	0	0	-0.5	0	0	0	0	0
27	25	1.51836	CCAGCAAAATTAAAGCCAGGTATG	6	3	0	0	0	0	0	0	1	0.5	0	0.5	0	0	0	0	0	0	0	0	0	0	0	0	0	0
28	25	1.51836	CCAGTAAAACTAAAGCCAGGAATG	3	2	0	0	0	0	0	0	1	0	0	0.5	0	0	0	0	0	0	0	0	-0.5	0	0	0	0	0
29	25	1.51836	CCAGTACAATTAAAGCCAGGAATG	2	2	0	0	0	0	0	0	1	0	0	0.5	0	0	0	0	0	0	0	0	-0.5	0	0	0	0	0
30	25	1.51836	CCAGTAAGACTAAAACCAGGAGTG	1	1	0	0	0	0	0	0	1	0	0	0.5	0	0	0	0	0	0	0	0	-0.5	0	0	0	0	0
31	25	1.51836	CCAGTAAAATTAAAGCCAGGACTG	2	2	0	0	0	0	0	0	1	0	0	0.5	0	0	0	0	0	0	0	0	-0.5	0	0	0	0	0
32	25	1.51836	CCAGTGAGATTAAAGCCAGGAATG	5	1	0	0	0	0	0	0	1	0	0	0.5	0	0	0	0	0	0	0	0	-0.5	0	0	0	0	0
33	25	1.51836	CCAGTAAAGTTAAAGCCAGGAATG	17	2	0	0	0	0	0	0	1	0	0	0.5	0	0	0	0	0	0	0	0	-0.5	0	0	0	0	0
34	25	1.51836	CCAGTAAAATTGAAGCCAGGAATG	48	2	0	0	0	0	0	0	1	0	0	0.5	0	0	0	0	0	0	0	0	-0.5	0	0	0	0	0
35	25	1.51836	CCAGTAAAATTGAGGCCAGGAATG	3	1	0	0	0	0	0	0	1	0	0	0.5	0	0	0	0	0	0	0	0	-0.5	0	0	0	0	0
36	25	1.51836	CCAGTAAAACTAAAACCAGGAATG	2	3	0	0	1	0	0	0	1	0	0	0.5	0	0	0	0	0	0	0	0	-0.5	0	0	0	0	0
37	25	1.51836	CCAGTAAAATTAAGGCCAGGAATG	7	2	0	0	0	0	0	0	1	0	0	0.5	0	0	0	0	0	0	0	0	-0.5	0	0	0	0	0
38	25	1.51836	CCTGTAAAATTAAAGCCAGGAATG	14	2	0	0	0	0	0	0	1	0	0	0.5	0	0	0	0	0	0	0	0	-0.5	0	0	0	0	0
39	25	1.51836	CCAGTAAAATTAAAGCCAGGAGTG	11	2	0	0	0	0	0	0	1	0	0	0.5	0	0	0	0	0	0	0	0	-0.5	0	0	0	0	0
40	25	1.51836	CCAGTAAAACTAGAGCCAGGAATG	1	0.5	0	0	0	0	0	0	1	0	0	0	0	0	0	0	0	0	0	0	-0.5	0	0	0	0	0
W5 for ZDV-3TC-EFV
d No. V	e Win start	f Info_E.	g Sequence	h No. seqs	I Score	1	2	3	4	5	6	7	8	9	10	11	12	13	14	15	16	17	18	19	20	21	22	23	24
1	153	1.93957	GCCTGAAAATCCATACAACACTCC	29	2	0	0	1	1	0	0	0	0.5	0	0.5	0	0	0	0	0	0	0	-1	0	0	0	0	0	0		2702-2725
2	153	1.93957	GCCTGAGAATCCATATAATACTCC	8	7	0	0	1	1	1	1	0	0.5	0.5	0.5	0.5	0	0	0	0	1	0	-1	0	0	0	0	0	0
3	153	1.93957	GCCTGAAAATCCGCACAATACTCC	1	3.5	0	0	1	1	1	0	0	0.5	0	0	0	0	0	0	0	1	0	-1	0	0	0	0	0	0
4	153	1.93957	GCCTGAAAATCCATACAACACACC	1	2	0	0	1	1	0	0	0	0.5	0	0.5	0	0	0	0	0	0	0	-1	0	0	0	0	0	0
5	153	1.93957	GCCTGAGAATCCATACAACACTCC	4	2.5	0	0	1	1	0	0	0	0.5	0.5	0.5	0	0	0	0	0	0	0	-1	0	0	0	0	0	0
6	153	1.93957	GCCTGAAAATCCATATAATACTCC	223	6.5	0	0	1	1	1	1	0	0.5	0	0.5	0.5	0	0	0	0	1	0	-1	0	0	0	0	0	0
7	153	1.93957	GCCTGAAAATCCATATAACACGCC	1	0.5	0	0	0	0	0	0	0	0.5	0	0.5	0.5	0	0	0	0	0	0	-1	0	0	0	0	0	0
8	153	1.93957	GGCTGAAAATCCATACAATACTCC	1	5	0	0	1	1	1	0	0	0.5	0	0.5	0	0	0	0	0	1	0	-1	0	0	0	0	0	0
9	153	1.93957	GCCTGAGAACCCATACAATACTCC	2	5.5	0	0	1	1	1	0	0	0.5	0.5	0.5	0	0	1	0	0	1	0	-1	0	0	0	0	0	0
10	153	1.93957	GCCTGGAAATCCGTACAATACTCC	1	3.5	0	0	1	1	1	0	0	0.5	0	0	0	0	0	0	0	1	0	-1	0	0	0	0	0	0
11	153	1.93957	GCCTGAAGACCCATACAATACTCC	1	5	0	0	1	1	1	0	0	0.5	0	0.5	0	0	1	0	0	1	0	-1	0	0	0	0	0	0
12	153	1.93957	GCCTGAAGATCCATACAATACTCC	1	4	0	0	1	1	1	0	0	0.5	0	0.5	0	0	0	0	0	1	0	-1	0	0	0	0	0	0
13	153	1.93957	GCCTGAGAATCCATACAATACTCC	22	4.5	0	0	1	1	1	0	0	0.5	0.5	0.5	0	0	0	0	0	1	0	-1	0	0	0	0	0	0
14	153	1.93957	GCCTGAAATCCCATACAATACTCC	1	5	0	0	1	1	1	0	0	0.5	0	0.5	0	0	1	0	0	1	0	-1	0	0	0	0	0	0
15	153	1.93957	GCCTGAAAGTCCATATAATACTCC	2	6.5	0	0	1	1	1	1	0	0.5	0	0.5	0.5	0	0	0	0	1	0	-1	0	0	0	0	0	0
16	153	1.93957	GCCTGAAAATCCATACAATCCTCC	1	2	0	0	1	1	0	0	0	0.5	0	0.5	0	0	0	0	0	0	0	-1	0	0	0	0	0	0
17	153	1.93957	GCCTGAAAATCCATACAATACTCC	741	5	0	0	1	1	1	0	0	0.5	0	0.5	0	0	0	0	0	1	0	-1	0	0	0	0	0	0
18	153	1.93957	GCCCGAAAATCCGTACAATACTCC	2	3.5	0	0	1	1	1	0	0	0.5	0	0	0	0	0	0	0	1	0	-1	0	0	0	0	0	0
19	153	1.93957	GCCTGAAAATCCATACAGCACTCC	1	1	0	0	1	0	0	0	0	0.5	0	0.5	0	0	0	0	0	0	0	-1	0	0	0	0	0	0
20	153	1.93957	GCCTGAAAATCCGTACAATACTCC	42	3.5	0	0	1	1	1	0	0	0.5	0	0	0	0	0	0	0	1	0	-1	0	0	0	0	0	0
21	153	1.93957	GCCTGACAACCCATATAACACTCC	1	4.5	0	0	1	1	1	0	0	0.5	0	0.5	0.5	0	1	0	0	0	0	-1	0	0	0	0	0	0
22	153	1.93957	ACCTGAAAATCCATATAATACTCC	2	6.5	0	0	1	1	1	1	0	0.5	0	0.5	0.5	0	0	0	0	1	0	-1	0	0	0	0	0	0
23	153	1.93957	GCCCGAAAATCCATACAACACTCC	1	2	0	0	1	1	0	0	0	0.5	0	0.5	0	0	0	0	0	0	0	-1	0	0	0	0	0	0
24	153	1.93957	GCCTGAAAGTCCCTACAATACTCC	1	3.5	0	0	1	1	1	0	0	0.5	0	0	0	0	0	0	0	1	0	-1	0	0	0	0	0	0
25	153	1.93957	GCCTGACAATCCATATAATACTCC	1	6.5	0	0	1	1	1	1	0	0.5	0	0.5	0.5	0	0	0	0	1	0	-1	0	0	0	0	0	0
26	153	1.93957	GCCTGAAAATCCATATAGTACTCC	1	5.5	0	0	1	1	1	0	0	0.5	0	0.5	0.5	0	0	0	0	1	0	-1	0	0	0	0	0	0
27	153	1.93957	GCCTGAAAACCCATACAATACTCC	62	5	0	0	1	1	1	0	0	0.5	0	0.5	0	0	1	0	0	1	0	-1	0	0	0	0	0	0
28	153	1.93957	ACCTGAAAATCCATACAATACTCC	43	5	0	0	1	1	1	0	0	0.5	0	0.5	0	0	0	0	0	1	0	-1	0	0	0	0	0	0
29	153	1.93957	GCCTGAGAATCCATACAATGCTCC	1	2.5	0	0	1	1	0	0	0	0.5	0.5	0.5	0	0	0	0	0	0	0	-1	0	0	0	0	0	0
30	153	1.93957	GCCTGAAAATCCATACGATACTCC	2	3	0	0	1	1	0	0	0	0.5	0	0.5	0	0	0	0	0	1	0	-1	0	0	0	0	0	0
31	153	1.93957	GCCTGGAAACCCATACAATACTCC	1	5	0	0	1	1	1	0	0	0.5	0	0.5	0	0	1	0	0	1	0	-1	0	0	0	0	0	0
32	153	1.93957	GCCTGAAAATCCTTACAATACTCC	1	5	0	0	1	1	1	0	0	0.5	0	0.5	0	0	0	0	0	1	0	-1	0	0	0	0	0	0
33	153	1.93957	GCCTGAAAATCCCTACAATACTCC	67	3.5	0	0	1	1	1	0	0	0.5	0	0	0	0	0	0	0	1	0	-1	0	0	0	0	0	0
34	153	1.93957	GCCTGAAAATCCATACAGTACTCC	4	3	0	0	1	1	0	0	0	0.5	0	0.5	0	0	0	0	0	1	0	-1	0	0	0	0	0	0
35	153	1.93957	GCCCGAGAATCCATACAATACTCC	4	4.5	0	0	1	1	1	0	0	0.5	0.5	0.5	0	0	0	0	0	1	0	-1	0	0	0	0	0	0
36	153	1.93957	GCCTGAAAACCCATATAACACTCC	3	4.5	0	0	1	1	1	0	0	0.5	0	0.5	0.5	0	1	0	0	0	0	-1	0	0	0	0	0	0
37	153	1.93957	GCCTGAAAGCCCATACAATACTCC	1	5	0	0	1	1	1	0	0	0.5	0	0.5	0	0	1	0	0	1	0	-1	0	0	0	0	0	0
38	153	1.93957	GCCCGAAAATCCATATAATACTCC	1	6.5	0	0	1	1	1	1	0	0.5	0	0.5	0.5	0	0	0	0	1	0	-1	0	0	0	0	0	0
39	153	1.93957	GCCTGAAAACCCATATAATACTCC	5	7.5	0	0	1	1	1	1	0	0.5	0	0.5	0.5	0	1	0	0	1	0	-1	0	0	0	0	0	0
40	153	1.93957	GCCTGGGAATCCATACAATACTCC	1	4.5	0	0	1	1	1	0	0	0.5	0.5	0.5	0	0	0	0	0	1	0	-1	0	0	0	0	0	0
41	153	1.93957	ACCTGAAAATCCATATAACACTCC	7	4.5	0	0	1	1	1	0	0	0.5	0	0.5	0.5	0	0	0	0	0	0	-1	0	0	0	0	0	0
42	153	1.93957	GCCTGAAAATCCCTATAATACTCC	1	6	0	0	1	1	1	1	0	0.5	0	0	0.5	0	0	0	0	1	0	-1	0	0	0	0	0	0
43	153	1.93957	GCCCGAAAATCCATACAATACTCC	10	4	0	0	1	1	1	0	0	0.5	0	0.5	0	0	0	0	0	1	0	-1	0	0	0	0	0	0
44	153	1.93957	GCCTGAAAATCTATACAATACTCC	1	5	0	0	1	1	1	0	0	0.5	0	0.5	0	0	0	0	0	1	0	-1	0	0	0	0	0	0
45	153	1.93957	GCCTGAAAGTCCATACAATACTCC	5	4	0	0	1	1	1	0	0	0.5	0	0.5	0	0	0	0	0	1	0	-1	0	0	0	0	0	0
46	153	1.93957	GCCTGAACATCCATATAATACTCC	1	7.5	0	0	1	1	1	1	0	0.5	0	0.5	0.5	1	0	0	0	1	0	-1	0	0	0	0	0	0
47	153	1.93957	GCCTGAAAACCCATACAACACTCC	3	3	0	0	1	1	0	0	0	0.5	0	0.5	0	0	1	0	0	0	0	-1	0	0	0	0	0	0
48	153	1.93957	GCCTGACAATCCATACAATACTCC	1	4	0	0	1	1	1	0	0	0.5	0	0.5	0	0	0	0	0	1	0	-1	0	0	0	0	0	0
49	153	1.93957	ACCTGAAAATCCATACAACACTCC	8	3	0	0	1	1	0	0	0	0.5	0	0.5	0	0	0	0	0	0	0	-1	0	0	0	0	0	0
50	153	1.93957	GCCTGAAAATTCATACAATACTCC	1	5	0	0	1	1	1	0	0	0.5	0	0.5	0	0	0	0	0	1	0	-1	0	0	0	0	0	0
51	153	1.93957	GCCTGAAAATCCATATAACACTCC	19	4.5	0	0	1	1	1	0	0	0.5	0	0.5	0.5	0	0	0	0	0	0	-1	0	0	0	0	0	0
52	153	1.93957	GCCTGGAAATCCATACAATACTCC	2	4	0	0	1	1	1	0	0	0.5	0	0.5	0	0	0	0	0	1	0	-1	0	0	0	0	0	0
53	153	1.93957	GCCTGAAAATCCCTACGATACTCC	1	2.5	0	0	1	1	0	0	0	0.5	0	0	0	0	0	0	0	1	0	-1	0	0	0	0	0	0
54	153	1.93957	GCCTGAAAATCCACACAATACTCC	1	4	0	0	1	1	1	0	0	0.5	0	0.5	0	0	0	0	0	1	0	-1	0	0	0	0	0	0
55	153	1.93957	GCCTGAAAATCCATACAATACGCC	2	1	0	0	0	0	0	0	0	0.5	0	0.5	0	0	0	0	0	1	0	-1	0	0	0	0	0	0
56	153	1.93957	GCCTGAAAATCAATACAACACTCC	1	3	0	0	1	1	0	0	0	0.5	0	0.5	0	0	0	0	0	0	0	-1	0	0	0	0	0	0
a MSA	2299_Resistant_Isolates
b Size	2299
c In_Seqs	1552	1564
d No. V	e Win start	f Info_E.	g Sequence	h No. seqs	I Score	1	2	3	4	5	6	7	8	9	10	11	12	13	14	15	16	17	18	19	20	21	22	23	24
1	2582	1.71671	CCAGTGACATTAAAGCCAGGAATG	1	2	0	0	0	0	0	0	1	0	0	0.5	0	1	0	0	0	0	0	0	-0.5	0	0	0	0	0		2574-2597
2	2582	1.71671	CCAGTAAAGTTAAAACCAGGAATG	2	3	0	0	1	0	0	0	1	0	0	0.5	0	0	0	0	0	0	0	0	-0.5	0	0	0	0	0
3	2582	1.71671	CCAGTAACATTAAAGCCAGGAATG	14	3	0	0	0	0	0	0	1	0	0	0.5	0	1	0	0	0	0	0	0	-0.5	0	0	0	0	0
4	2582	1.71671	CCAGTAAGATTAAAACCAGGAATG	1	3	0	0	1	0	0	0	1	0	0	0.5	0	0	0	0	0	0	0	0	-0.5	0	0	0	0	0
5	2582	1.71671	CCAGTAAAATTAAAGCCAGGAATG	1254	2	0	0	0	0	0	0	1	0	0	0.5	0	0	0	0	0	0	0	0	-0.5	0	0	0	0	0
6	2582	1.71671	CCAGTAAAATTAAAGCCAGGTATG	2	2	0	0	0	0	0	0	1	0	0	0.5	0	0	0	0	0	0	0	0	-0.5	0	0	0	0	0
7	2582	1.71671	CCAGTTAAATTAAAGCCAGGAATG	6	1	0	0	0	0	0	0	1	0	0	0.5	0	0	0	0	0	0	0	0	-0.5	-1	0	0	0	0
8	2582	1.71671	CCAGTACCATTAAAACCAGGAATG	1	4	0	0	1	0	0	0	1	0	0	0.5	0	1	0	0	0	0	0	0	-0.5	0	0	0	0	0
9	2582	1.71671	CCAGTAAAACTAAAGCCTGGAATG	1	2	0	0	0	0	0	0	1	0	0	0.5	0	0	0	0	0	0	0	0	-0.5	0	0	0	0	0
10	2582	1.71671	CCTGTAAAACTGAAGCCAGGAATG	1	1	0	0	0	0	0	0	1	0	0	0.5	0	0	0	0	0	0	0	0	-0.5	0	0	0	0	0
11	2582	1.71671	CCAGTAAAAGGAAAGCCAGGAATG	1	0	0	0	0	0	0	0	1	0	0	0.5	0	0	0	0	0	0	0	0	-0.5	0	0	-1	0	0
12	2582	1.71671	CCAGTGAAACTAAAGCCAGGAATG	1	1	0	0	0	0	0	0	1	0	0	0.5	0	0	0	0	0	0	0	0	-0.5	0	0	0	0	0
13	2582	1.71671	CCAGTACAATTAAAGCCAGGAATG	2	2	0	0	0	0	0	0	1	0	0	0.5	0	0	0	0	0	0	0	0	-0.5	0	0	0	0	0
14	2582	1.71671	CCAGTAAAGTTAAAGCCAGGAATG	16	2	0	0	0	0	0	0	1	0	0	0.5	0	0	0	0	0	0	0	0	-0.5	0	0	0	0	0
15	2582	1.71671	CCAGTAAAATTGAAGCCAGGAATG	77	2	0	0	0	0	0	0	1	0	0	0.5	0	0	0	0	0	0	0	0	-0.5	0	0	0	0	0
16	2582	1.71671	CCAGTAAAACTAAAACCAGGAATG	2	3	0	0	1	0	0	0	1	0	0	0.5	0	0	0	0	0	0	0	0	-0.5	0	0	0	0	0
17	2582	1.71671	CCAGTAACATTAAAGCCAGGCATG	1	0	0	0	0	0	0	0	0	0	0	0.5	0	1	0	0	0	0	0	-1	-0.5	0	0	0	0	0
18	2582	1.71671	CCTGTAAAATTAAAACCAGGAATG	2	3	0	0	1	0	0	0	1	0	0	0.5	0	0	0	0	0	0	0	0	-0.5	0	0	0	0	0
19	2582	1.71671	CCAGTAAAATTAAACCCAGGAATG	6	2	0	0	0	0	0	0	1	0	0	0.5	0	0	0	0	0	0	0	0	-0.5	0	0	0	0	0
20	2582	1.71671	CCAGTAAGATTAAAGCCAGGAATG	12	2	0	0	0	0	0	0	1	0	0	0.5	0	0	0	0	0	0	0	0	-0.5	0	0	0	0	0
21	2582	1.71671	CCAGTAAAATTAAAACCAGGAATG	74	3	0	0	1	0	0	0	1	0	0	0.5	0	0	0	0	0	0	0	0	-0.5	0	0	0	0	0
22	2582	1.71671	CCAGTAAAATTAAAGCCAGGCATG	2	0	0	0	0	0	0	0	0	0	0	0.5	0	0	0	0	0	0	0	-1	-0.5	0	0	0	0	0
23	2582	1.71671	CCAGTAAAACTGAAGCCAGGAATG	2	1	0	0	0	0	0	0	1	0	0	0.5	0	0	0	0	0	0	0	0	-0.5	0	0	0	0	0
24	2582	1.71671	CCAGTGAAATTAAAGCCAGGAATG	18	2	0	0	0	0	0	0	1	0	0	0.5	0	0	0	0	0	0	0	0	-0.5	0	0	0	0	0
25	2582	1.71671	CCAGTGAAATTAAAACCAGGAATG	2	3	0	0	1	0	0	0	1	0	0	0.5	0	0	0	0	0	0	0	0	-0.5	0	0	0	0	0
26	2582	1.71671	CCGGTAAAATTAAAGCCAGGAATG	4	2	0	0	0	0	0	0	1	0	0	0.5	0	0	0	0	0	0	0	0	-0.5	0	0	0	0	0
27	2582	1.71671	CCAGTAACATTGAAGCCAGGAATG	1	2	0	0	0	0	0	0	1	0	0	0.5	0	1	0	0	0	0	0	0	-0.5	0	0	0	0	0
28	2582	1.71671	CCAGTAAAATTGAAACCAGGAATG	8	3	0	0	1	0	0	0	1	0	0	0.5	0	0	0	0	0	0	0	0	-0.5	0	0	0	0	0
29	2582	1.71671	CCAGTGAAATTGAAACCAGGAATG	1	3	0	0	1	0	0	0	1	0	0	0.5	0	0	0	0	0	0	0	0	-0.5	0	0	0	0	0
30	2582	1.71671	CCAGTAAAACTAAAGCCAGGAATG	23	2	0	0	0	0	0	0	1	0	0	0.5	0	0	0	0	0	0	0	0	-0.5	0	0	0	0	0
31	2582	1.71671	CCAGTAAAATTAAAGCCAGGAGTG	8	2	0	0	0	0	0	0	1	0	0	0.5	0	0	0	0	0	0	0	0	-0.5	0	0	0	0	0
32	2582	1.71671	CCTGTAAAATTAAAGCCAGGAATG	14	2	0	0	0	0	0	0	1	0	0	0.5	0	0	0	0	0	0	0	0	-0.5	0	0	0	0	0
33	2582	1.71671	CCAGTAACATTAAAACCAGGAATG	5	4	0	0	1	0	0	0	1	0	0	0.5	0	1	0	0	0	0	0	0	-0.5	0	0	0	0	0
W2 for 2299_Resistant_Isolates
d No. V	e Win start	f Info_E.	g Sequence	h No. seqs	I Score	1	2	3	4	5	6	7	8	9	10	11	12	13	14	15	16	17	18	19	20	21	22	23	24
1	10324	1.70772	CCAGTAAAATTAAAGCCAGGCATG	2	0	0	0	0	0	0	0	0	0	0	0.5	0	0	0	0	0	0	0	-1	-0.5	0	0	0	0	0		2574-2597
2	10324	1.70772	CCTGTAAAATTAAAGCCAGGAATG	14	2	0	0	0	0	0	0	1	0	0	0.5	0	0	0	0	0	0	0	0	-0.5	0	0	0	0	0
3	10324	1.70772	CCAGTAAAGTTAAAACCAGGAATG	2	3	0	0	1	0	0	0	1	0	0	0.5	0	0	0	0	0	0	0	0	-0.5	0	0	0	0	0
4	10324	1.70772	CCAGTGAAACTAAAGCCAGGAATG	1	1	0	0	0	0	0	0	1	0	0	0.5	0	0	0	0	0	0	0	0	-0.5	0	0	0	0	0
5	10324	1.70772	CCAGTAAAATTAAACCCAGGAATG	6	2	0	0	0	0	0	0	1	0	0	0.5	0	0	0	0	0	0	0	0	-0.5	0	0	0	0	0
6	10324	1.70772	CCAGTGAAATTAAAGCCAGGAATG	18	2	0	0	0	0	0	0	1	0	0	0.5	0	0	0	0	0	0	0	0	-0.5	0	0	0	0	0
7	10324	1.70772	CCAGTAACATTAAAACCAGGAATG	5	4	0	0	1	0	0	0	1	0	0	0.5	0	1	0	0	0	0	0	0	-0.5	0	0	0	0	0
8	10324	1.70772	CCAGTAAAGTTAAAGCCAGGAATG	16	2	0	0	0	0	0	0	1	0	0	0.5	0	0	0	0	0	0	0	0	-0.5	0	0	0	0	0
9	10324	1.70772	CCAGTAAAATTGAAGCCAGGAATG	77	2	0	0	0	0	0	0	1	0	0	0.5	0	0	0	0	0	0	0	0	-0.5	0	0	0	0	0
10	10324	1.70772	CCAGTAACATTGAAGCCAGGAATG	1	2	0	0	0	0	0	0	1	0	0	0.5	0	1	0	0	0	0	0	0	-0.5	0	0	0	0	0
11	10324	1.70772	CCAGTAAAATTGAAACCAGGAATG	8	3	0	0	1	0	0	0	1	0	0	0.5	0	0	0	0	0	0	0	0	-0.5	0	0	0	0	0
12	10324	1.70772	CCTGTAAAACTGAAGCCAGGAATG	1	1	0	0	0	0	0	0	1	0	0	0.5	0	0	0	0	0	0	0	0	-0.5	0	0	0	0	0
13	10324	1.70772	CCAGTAAAACTGAAGCCAGGAATG	2	1	0	0	0	0	0	0	1	0	0	0.5	0	0	0	0	0	0	0	0	-0.5	0	0	0	0	0
14	10324	1.70772	CCAGTGAAATTAAAACCAGGAATG	2	3	0	0	1	0	0	0	1	0	0	0.5	0	0	0	0	0	0	0	0	-0.5	0	0	0	0	0
15	10324	1.70772	CCAGTGACATTAAAGCCAGGAATG	1	2	0	0	0	0	0	0	1	0	0	0.5	0	1	0	0	0	0	0	0	-0.5	0	0	0	0	0
16	10324	1.70772	CCAGTAAAACTAAAGCCTGGAATG	1	2	0	0	0	0	0	0	1	0	0	0.5	0	0	0	0	0	0	0	0	-0.5	0	0	0	0	0
17	10324	1.70772	CCAGTAAAATTAAAGCCAGGAGTG	8	2	0	0	0	0	0	0	1	0	0	0.5	0	0	0	0	0	0	0	0	-0.5	0	0	0	0	0
18	10324	1.70772	CCAGTAAAAGGAAAGCCAGGAATG	1	0	0	0	0	0	0	0	1	0	0	0.5	0	0	0	0	0	0	0	0	-0.5	0	0	-1	0	0
19	10324	1.70772	CCTGTAAAATTAAAACCAGGAATG	2	3	0	0	1	0	0	0	1	0	0	0.5	0	0	0	0	0	0	0	0	-0.5	0	0	0	0	0
20	10324	1.70772	CCAGTAAAATTAAAACCAGGAATG	74	3	0	0	1	0	0	0	1	0	0	0.5	0	0	0	0	0	0	0	0	-0.5	0	0	0	0	0
21	10324	1.70772	CCAGTGAAATTGAAACCAGGAATG	1	3	0	0	1	0	0	0	1	0	0	0.5	0	0	0	0	0	0	0	0	-0.5	0	0	0	0	0
22	10324	1.70772	CCAGTAAAATTAAAGCCAGGTATG	2	2	0	0	0	0	0	0	1	0	0	0.5	0	0	0	0	0	0	0	0	-0.5	0	0	0	0	0
23	10324	1.70772	CCAGTAAAACTAAAACCAGGAATG	2	3	0	0	1	0	0	0	1	0	0	0.5	0	0	0	0	0	0	0	0	-0.5	0	0	0	0	0
24	10324	1.70772	CCAGTAACATTAAAGCCAGGCATG	1	0	0	0	0	0	0	0	0	0	0	0.5	0	1	0	0	0	0	0	-1	-0.5	0	0	0	0	0
25	10324	1.70772	CCGGTAAAATTAAAGCCAGGAATG	4	2	0	0	0	0	0	0	1	0	0	0.5	0	0	0	0	0	0	0	0	-0.5	0	0	0	0	0
26	10324	1.70772	CCAGTAACATTAAAGCCAGGAATG	14	3	0	0	0	0	0	0	1	0	0	0.5	0	1	0	0	0	0	0	0	-0.5	0	0	0	0	0
27	10324	1.70772	CCAGTAAGATTAAAACCAGGAATG	1	3	0	0	1	0	0	0	1	0	0	0.5	0	0	0	0	0	0	0	0	-0.5	0	0	0	0	0
28	10324	1.70772	CCAGTAAAATTAAAGCCAGGAATG	1266	2	0	0	0	0	0	0	1	0	0	0.5	0	0	0	0	0	0	0	0	-0.5	0	0	0	0	0
29	10324	1.70772	CCAGTTAAATTAAAGCCAGGAATG	6	1	0	0	0	0	0	0	1	0	0	0.5	0	0	0	0	0	0	0	0	-0.5	-1	0	0	0	0
30	10324	1.70772	CCAGTACCATTAAAACCAGGAATG	1	4	0	0	1	0	0	0	1	0	0	0.5	0	1	0	0	0	0	0	0	-0.5	0	0	0	0	0
31	10324	1.70772	CCAGTACAATTAAAGCCAGGAATG	2	2	0	0	0	0	0	0	1	0	0	0.5	0	0	0	0	0	0	0	0	-0.5	0	0	0	0	0
32	10324	1.70772	CCAGTAAGATTAAAGCCAGGAATG	12	2	0	0	0	0	0	0	1	0	0	0.5	0	0	0	0	0	0	0	0	-0.5	0	0	0	0	0
33	10324	1.70772	CCAGTAAAACTAAAGCCAGGAATG	23	2	0	0	0	0	0	0	1	0	0	0.5	0	0	0	0	0	0	0	0	-0.5	0	0	0	0	0
a MSA	Name of the multiple sequence alignment (MSA) tested
b Size	Numer of initial sequences in the alignment. Some these sequences are rejected
c In_Seqs	Number of sequences used in the analysis
d No. V	Each of the different sequences found for a sliding window of 23 nts
e Win start	Position of the window in the analyzed alignment, not with respect HXB2
f Info_E	Information Entropy
g Sequence	Nucleotide sequence for each viral variant in the 23 sliding window
h No. seqs	Number of sequences that have that sequence, frequency
I Score	total value from adding individual sequence features

## Sheet: Score_punctuation
Supplementary Material
Score parameters, sequence features that enhance silencing :
No.	Score: sequence features parameters	Punctuation
1	1-2 is AA/AT/TT/TA (Initiation of transcription)	+0.5
2	22-23 is AA/AT/TT/TA (3’ overhangs)	+0.5
3	4 A/T in 15-21	+1, and +1 for any additional A or T
4	5 A/T in 15-21	+1, and +1 for any additional A or T
5	6 A/T in 15-21	+1, and +1 for any additional A or T
6	7 A/T in 15-21	+1, and +1 for any additional A or T
7	A/T at 21	+1
8	G/C at 5	+0.5
9	G at 7	+0.5
10	A at 13	+0.5
11	T at 16	+0.5
12	CA at 8-9	+1
13	CC at 10-11	+1
14	TG at 12-13	+1
15	GA at 15-16	+1
16	TA at 19-20	+1
17	TA at 20-21	+1
18	No G/C at 21	-1
19	No T at 5	-0.5
20	No TA at 6-7	-1
21	No TA at 8-9	-1
22	No GG at 10-11	-1
23	No GC at 11-12	-1
24	No GA at 19-20	-1
